# Supplementary material for: Effect of home-based high-intensity interval training and behavioural modification using information and communication technology on cardiorespiratory fitness and exercise habits among sedentary breast cancer survivors: habit-B study protocol for a randomised controlled trial
Source: PubMed Central journal article supplement — BMJ Open. 2019 Aug 22;9(8):e030911. doi: 10.1136/bmjopen-2019-030911 (PMC6707761; doi:10.1136/bmjopen-2019-030911), 2019-08-22
Supplement: bmjopen-2019-030911.draft_revisions.pdf [file bmjopen-2019-030911.draft_revisions.pdf]

# BMJ Open

BMJ Open is committed to open peer review. As part of this commitment we make the peer review history of every article we publish publicly available.

When an article is published we post the peer reviewers' comments and the authors' responses online. We also post the versions of the paper that were used during peer review. These are the versions that the peer review comments apply to.

The versions of the paper that follow are the versions that were submitted during the peer review process. They are not the versions of record or the final published versions. They should not be cited or distributed as the published version of this manuscript.

BMJ Open is an open access journal and the full, final, typeset and author-corrected version of record of the manuscript is available on our site with no access controls, subscription charges or pay-per-view fees (<http://bmjopen.bmj.com>).

If you have any questions on BMJ Open's open peer review process please email [info.bmjopen@bmj.com](mailto:info.bmjopen@bmj.com)

# BMJ Open

**Effect of home-based high-intensity interval training and behavioral modification using information and communication technology on cardiorespiratory fitness and exercise habits among sedentary breast cancer survivors: the habit-B study protocol for a randomized controlled trial**

|                               |                                                                                                                                                                                                                                                                                                                                                                                                                                                                                                                                                                                                                                                                                                                                                                                                                                                                                                                                                                                                                                                                                                                                                              |
|-------------------------------|--------------------------------------------------------------------------------------------------------------------------------------------------------------------------------------------------------------------------------------------------------------------------------------------------------------------------------------------------------------------------------------------------------------------------------------------------------------------------------------------------------------------------------------------------------------------------------------------------------------------------------------------------------------------------------------------------------------------------------------------------------------------------------------------------------------------------------------------------------------------------------------------------------------------------------------------------------------------------------------------------------------------------------------------------------------------------------------------------------------------------------------------------------------|
| Journal:                      | <i>BMJ Open</i>                                                                                                                                                                                                                                                                                                                                                                                                                                                                                                                                                                                                                                                                                                                                                                                                                                                                                                                                                                                                                                                                                                                                              |
| Manuscript ID                 | bmjopen-2019-030911                                                                                                                                                                                                                                                                                                                                                                                                                                                                                                                                                                                                                                                                                                                                                                                                                                                                                                                                                                                                                                                                                                                                          |
| Article Type:                 | Protocol                                                                                                                                                                                                                                                                                                                                                                                                                                                                                                                                                                                                                                                                                                                                                                                                                                                                                                                                                                                                                                                                                                                                                     |
| Date Submitted by the Author: | 08-Apr-2019                                                                                                                                                                                                                                                                                                                                                                                                                                                                                                                                                                                                                                                                                                                                                                                                                                                                                                                                                                                                                                                                                                                                                  |
| Complete List of Authors:     | <p>Tsuji, Katsunori; National Cancer Center Japan, Division of Health Care Research, Center for Public Health Sciences<br/> Ochi, Eisuke; National Cancer Center Japan, Division of Health Care Research, Center for Public Health Sciences; Hosei University, Faculty of Bioscience and Applied Chemistry<br/> Okubo, Ryo; National Cancer Center Japan, Division of Health Care Research, Center for Public Health Sciences<br/> Shimizu, Yoichi; National Cancer Center Japan, Division of Health Care Research, Center for Public Health Sciences<br/> Kuchiba, Aya; National Cancer Center Japan, Division of Biostatistical Research, Center for Public Health Sciences; National Cancer Center Japan, Biostatistics Division, Center for Research Administration and Support<br/> Shimazu, Taichi; National Cancer Center Japan, Division of Prevention, Center for Public Health Sciences<br/> Kinoshita, Takayuki; National Cancer Center Hospital, Department of Breast Surgery<br/> Sakurai, Naomi; Cancer Solutions<br/> Matsuoka, Yutaka; National Cancer Center Japan, Division of Health Care Research, Center for Public Health Sciences</p> |
| Keywords:                     | Breast tumours < ONCOLOGY, SPORTS MEDICINE, PREVENTIVE MEDICINE, CLINICAL PHYSIOLOGY                                                                                                                                                                                                                                                                                                                                                                                                                                                                                                                                                                                                                                                                                                                                                                                                                                                                                                                                                                                                                                                                         |
|                               |                                                                                                                                                                                                                                                                                                                                                                                                                                                                                                                                                                                                                                                                                                                                                                                                                                                                                                                                                                                                                                                                                                                                                              |

SCHOLARONE™  
Manuscripts

## BMJ Open Study protocols

Effect of home-based high-intensity interval training and behavioral modification using information and communication technology on cardiorespiratory fitness and exercise habits among sedentary breast cancer survivors: the habit-B study protocol for a randomized controlled trial

Katsunori Tsuji<sup>1\*</sup>, Eisuke Ochi<sup>1, 2\*</sup>, Ryo Okubo<sup>1</sup>, Yoichi Shimizu<sup>1</sup>, Aya Kuchiba<sup>3,4</sup>, Taichi Shimazu<sup>5</sup>, Takayuki Kinoshita<sup>6</sup>, Naomi Sakurai<sup>7</sup>, Yutaka J. Matsuoka<sup>1</sup>

1. Division of Health Care Research, Center for Public Health Sciences, National Cancer Center Japan, Tokyo, Japan
2. Faculty of Bioscience and Applied Chemistry, Hosei University, Tokyo, Japan
3. Division of Biostatistical Research, Center for Public Health Sciences, National Cancer Center Japan, Tokyo, Japan
4. Biostatistics Division, Center for Research Administration and Support, National Cancer Center Japan, Tokyo, Japan
5. Division of Prevention, Center for Public Health Sciences, National Cancer Center Japan, Tokyo, Japan
6. Department of Breast Surgery, National Cancer Center Hospital, Tokyo, Japan
7. Cancer Solutions, Tokyo, Japan

\* These two authors contributed equally to this work

Corresponding author

Yutaka J. Matsuoka, MD, PhD

Division of Health Care Research, Center for Public Health Sciences, National Cancer Center Japan, Tokyo, Japan

E-mail address: yumatsuo@ncc.go.jp, Phone: +81-3-3547-5201 ext. 3382

## ABSTRACT

### Introduction

Maintaining high levels of physical activity not only helps to maintain and improve physical health and quality of life, but also plays a role in reducing short- and long-term adverse effects due to cancer treatments. Moreover, a greater degree of cardiorespiratory fitness is associated with reduced risk of all-cause mortality. However, there are no home-based programs for improving cardiorespiratory fitness using body weight exercises for breast cancer survivors. This study will assess the efficacy of the newly developed habit-B program on maximum oxygen uptake compared with treatment as usual. The effects of this program on exercise habits, level of physical activity, physical fitness, and subjective indices will also be investigated.

### Methods and analysis

This is a 12-week, parallel-group, single blind, randomized controlled trial. Allocation will be managed by a central server using a computer-generated random allocation sequence provided by an independent data center. Participants will be assigned to the Habit-B Program (high-intensity interval training [HIIT] exercise, exercise counseling + guidance, home-based exercise support using information and communication technology [ICT], and a wearable device) or treatment as usual with a wearable device. Subjects will be sedentary women aged 20 to 59 years who have received breast surgery in the past 2 to 13 months after diagnosis of invasive breast cancer (Stage I-IIa) and have never received neo-

1  
2  
3  
4  
5  
6  
7  
8  
9  
10  
11  
12  
13  
14  
15  
16  
17  
18  
19  
20  
21  
22  
23  
24  
25  
26  
27  
28  
29  
30  
31  
32  
33  
34  
35  
36  
37  
38  
39  
40  
41  
42  
43  
44  
45  
46  
47  
48  
49  
50  
51  
52  
53  
54  
55  
56  
57  
58  
59  
60

adjuvant or adjuvant chemo-therapy except for hormone therapy. The primary endpoint is the amount of change in peak oxygen uptake ( $VO_{2peak}$ ; mL/kg/min) between the groups after 12 weeks of intervention.

### **Ethics and dissemination**

The study protocol was approved by the Institutional Review Board of the National Cancer Center Japan on 28 February 2019 (ID: 2018-274).

**Trial status** Study enrolment, intervention, and data collection are ongoing. The estimated end date for this study is on March 31, 2021.

**Trial registration number** UMIN000036400; Pre-results.

### **Strengths and limitations of this study**

1. If the findings of this trial suggest that the intervention is effective, it is expected to lead to establishing an effective exercise program for breast cancer survivors in Asia;  $VO_{2peak}$  of breast cancer survivors will be improved and exercise habits will be formed.
2. By achieving the trial objectives, it will become possible to suggest a home exercise program.
3. Data on clinical problems and participants' opinions obtained in this study can subsequently be utilized in the dissemination and implementation of future programs.

- 1  
2  
3  
4  
5  
6  
7  
8  
9  
10  
11  
12  
13  
14  
15  
16  
17  
18  
19  
20  
21  
22  
23  
24  
25  
26  
27  
28  
29  
30  
31  
32  
33  
34  
35  
36  
37  
38  
39  
40  
41  
42  
43  
44  
45  
46  
47  
48  
49  
50  
51  
52  
53  
54  
55  
56  
57  
58  
59  
60
4. Even if implementation, effectiveness, or usefulness are not demonstrated, analyzing the cause of this should contribute to planning a new exercise program.
  5. Collaborative work with professionals in the field of clinical oncology, exercise science, mental health, rehabilitation, public health, nursing, and cancer survivors constitutes a new model for cancer survivorship care.

## INTRODUCTION

Breast cancer, which is one of the most common cancers affecting women, newly affects over 86,000 women each year<sup>1</sup>. Advances in early detection and treatment have improved survival rates, with the current 10-year survival rate at over 90%<sup>1</sup>. It is recommended that cancer survivors acquire and maintain healthy behaviors to extend survival, such as staying reasonably fit through appropriate physical exercise and having a healthy diet<sup>2</sup>. High levels of physical activity not only help to maintain and improve physical health and quality of life (QOL), but also play a role in reducing short- and long-term side effects of cancer treatment<sup>3</sup>. The American Cancer Society guidelines recommend a minimum of 150 min moderate physical activity or 75 min intensive physical activity per week, in addition to usual physical activity in daily life<sup>4</sup>, and the Japan Breast Cancer Society's Clinical Guidelines for Breast Cancer strongly recommend maintaining a high level of physical activity<sup>5 6</sup>. Exercise is effective in treating breast cancer because it significantly improves physical function, mental health, and physiological markers before, during, and after cancer treatment<sup>5 6</sup>. A US study previously reported that following breast cancer diagnosis, less than half of patients maintained a level of physical activity at or above the recommended standards<sup>7</sup>. We assume that the proportion of individuals with a habit of exercising is low among breast cancer survivors as well and that very few maintain a high level of physical activity in Japan.

1  
2  
3  
4  
5  
6 Previous studies of physical activity and exercise intervention among breast  
7  
8 cancer survivors have mainly focused on weight gain<sup>8 9</sup>, impairment of endothelial  
9  
10 function<sup>10</sup>, lower bone density in post-menopausal women<sup>11</sup>, and lower physical  
11  
12 fitness<sup>12 13</sup>. The ENERGY Trial, an early and representative study conducted in the  
13  
14 US, demonstrated the effectiveness of a home exercise program and nutritional  
15  
16 advice to promote weight loss among breast cancer survivors<sup>8</sup>. However, because  
17  
18 the proportion of overweight adults in Japan is lower than that in the US<sup>14</sup>, it is not  
19  
20 appropriate to adopt the US-developed program in Japan. It would appear suitable  
21  
22 though to develop intervention around measurements of  $VO_{2peak}$ , the globally  
23  
24 important health indicator of cardiorespiratory fitness<sup>15 16</sup>.

25  
26  
27  
28  
29  
30  
31  $VO_{2peak}$  decreases with age, and a meta-analysis has suggested that women  
32  
33 who are sedentary have a decrease of 3.2 mL/kg/min over 10 years<sup>17</sup>. A cohort  
34  
35 study suggested that the all-cause mortality rate decreased by 17% for each 1  
36  
37 metabolic equivalent (MET) increase (3.5 mL/kg/min) in  $VO_{2peak}$  for women<sup>18</sup>.  
38  
39 Also, individuals who met the standards for physical activity had a relative risk of  
40  
41 0.76 compared with those engaging in no physical activity, and individuals with a  
42  
43 moderate  $VO_{2peak}$  had a relative risk of 0.56 compared with those with a low  
44  
45  $VO_{2peak}$ . Thus, maintaining a high  $VO_{2peak}$  has great benefits in terms of all-cause  
46  
47 mortality rate<sup>19</sup>. A systematic review demonstrated that the median  $VO_{2peak}$  of  
48  
49 breast cancer survivors not receiving chemotherapy was lower than that of  
50  
51 healthy sedentary women (25.3 mL/kg/min vs. 29.7 mL/kg/min)<sup>13</sup>. In a 16-year  
52  
53 follow-up study of breast cancer survivors<sup>13</sup>, hazard ratios were 0.67 for the  
54  
55  
56  
57  
58  
59  
60



1  
2  
3  
4  
5  
6 moderate  $VO_{2peak}$  group (8.5 METs) and 0.45 for the high group (11.1 METs)  
7  
8 compared with the low  $VO_{2peak}$  group (6.7 METs). In this report, the mortality rate  
9  
10 was reduced by maintaining a  $VO_{2peak}$  of 8 METs or above<sup>13</sup>. Against this  
11  
12 background, it is necessary to develop an exercise program that will increase  
13  
14  
15  
16  $VO_{2peak}$  in breast cancer survivors.

17  
18  
19 When considering how to increase  $VO_{2peak}$ , research has advanced in recent  
20  
21 years with the use of HIIT for athletes and sedentary populations<sup>20-22</sup>. HIIT allows  
22  
23 subjects to exercise at vigorous intensity within 10 min, resulting in improved  
24  
25 cardiorespiratory fitness<sup>16 23</sup>. A recent systematic review showed, based on the  
26  
27 findings of 12 studies of HITT conducted in supervised experimental settings, that  
28  
29 HITT appeared to be more beneficial than treatment as usual for improving  
30  
31 physical fitness and health-related outcomes in cancer survivors during any stage  
32  
33 of treatment and aftercare<sup>23</sup>. To our knowledge, only one study has evaluated  
34  
35 changes in cardiorespiratory fitness following a home-based HITT program, which  
36  
37 involved healthy young women<sup>24</sup>. Given that no home-based HIIT programs with  
38  
39 body weight exercises have been reported for breast cancer survivors to date, it is  
40  
41 necessary to develop such programs and examine their efficacy and feasibility.  
42  
43  
44  
45  
46  
47

48  
49 Recent emerging technologies such as apps and wearable devices are  
50  
51 promising tools for the monitoring of cancer patients' daily activity levels and for  
52  
53 facilitating coaching, self-monitoring, feedback, and encouragement to  
54  
55 exercise<sup>25,26</sup>. Apps<sup>27</sup> and wearable devices<sup>28</sup> are being used for both subjective and  
56  
57 objective measures in the field of clinical oncology. However, further investigations  
58  
59  
60

1  
2  
3  
4  
5  
6 are needed of their potential utility in objective evaluations of physical activity as  
7  
8 well as in lifestyle modification and maintenance and enhancement of QOL in real-  
9  
10 world settings.  
11  
12

13 The aim of this study is to investigate the effect of the newly developed  
14 habit-B program, comprising home-based high-intensity interval training and  
15 behavioral modification using information and communication technology on  
16 cardiorespiratory fitness and exercise habits for sedentary breast cancer  
17 survivors. We will investigate whether the habit-B program improves  $VO_{2peak}$   
18 compared with a control group as well as investigate the safety and feasibility of  
19 program. The secondary objectives are to investigate the effect of this program on  
20 exercise habits, physical activity level, physical function, and subjective measures.  
21  
22  
23  
24  
25  
26  
27  
28  
29  
30  
31  
32  
33  
34  
35  
36  
37  
38  
39  
40  
41  
42  
43  
44  
45  
46  
47  
48  
49  
50  
51  
52  
53  
54  
55  
56  
57  
58  
59  
60

## METHODS AND ANALYSIS

### Trial design (Figure 1)

In this study 12-week, parallel-group, single blind, randomized controlled trial, participants will be randomly assigned to intervention either with the habit-B program (HIIT exercise, exercise counseling + guidance, home-based exercise support using ICT, and a wearable device) or treatment as usual with a wearable device. An independent data center will provide computer-generated random allocation. The allocation sequences will be maintained centrally and the results of the assignment will be automatically displayed on each participant's app.

### Participants

The eligibility criteria for participants are as follows: (1) female, aged between 20 and 59 years at diagnosis (stages I-IIa); (2) diagnosed with invasive breast cancer within 2 to 13 months after surgery; (3) not requiring cancer chemotherapy aside from hormone therapy; (4) currently engages in not more than moderate intensity exercise for 30 min on 2 separate days per week (total of 60 min); (5) ability to complete an electronic patient reported outcome (e-PRO) questionnaire via a smartphone; (6) consent to trial participation obtained in writing from the patient themselves; and (7) ability to read, write, and understand Japanese. The exclusion criteria are as follows: (1) judged to have severely reduced cognitive function by a primary physician; (2) exercise judged to be risky by a primary physician; (3) history of smoking within the previous 12 months; (4) body

1  
2  
3  
4  
5  
6 mass index of 30 or above; (5) abnormal electrocardiogram in preoperative  
7  
8 testing, resting heart rate (HR) below 60 beats/min or above 100 beats/min, or  
9  
10 stage III hypertension or above (diastolic blood pressure over 110 mmHg or  
11  
12 systolic blood pressure over 180 mmHg); and (6) judged unfit for the trial by a  
13  
14 primary physician for other reasons.  
15  
16  
17  
18  
19  
20

## 21 **Interventions**

22  
23 This will be a randomized, single-blind study. Participants will be  
24  
25 enrolled and assigned using an electronic data capture system with an app. The  
26  
27 protocol intervention will be started within 21 days of enrollment. If for some  
28  
29 reason the start is delayed beyond 21 days, the reason will be entered into the  
30  
31 electronic Case Report Form (eCRF). If it is determined that the intervention  
32  
33 cannot be started, the details will be noted in the eCRF as “protocol intervention  
34  
35 stopped.”  
36  
37  
38  
39  
40  
41  
42  
43

44 The habit-B program group

45  
46 The habit-B program comprises home-based exercise support utilizing 6  
47  
48 weeks of exercise counseling/exercise guidance and 12 weeks of ICT intervention  
49  
50 (e-mail, app, wearable device; shown in Figure 2). Participants will be encouraged  
51  
52 to complete the following program HIIT using specific body weight exercises for a  
53  
54 10-min training session 3 times a week for 12 weeks (total of 36 sessions during the  
55  
56 trial period; Figure 3): (1) one 10-min session of exercises focused on the lower  
57  
58  
59  
60

1  
2  
3  
4  
5  
6 limbs; (2) a total of 10 min exercises, comprising a 3-min warm-up, 4-min training  
7  
8 (8 sets of 20 s exercise + 10 s rest), and a 3-min cool-down; (3) these training  
9  
10 exercises are designed to increase in intensity each week; and (4) the details of these  
11  
12 exercises are divided into three stages according to cardiorespiratory fitness  
13  
14 ( $VO_{2peak}$ ) at Week 0 and the contents of training are designed to increase physical  
15  
16 strength incrementally in accordance with the individual's level of strength. In  
17  
18 addition, we will continue to follow up on the between-group differences in e-PRO  
19  
20 data of change from baseline to 24 and 36 weeks post-intervention.  
21  
22  
23  
24  
25

26 The social cognitive theory proposed by Bandura et al. may be helpful to  
27  
28 apply when considering interventions for behavioral change<sup>29</sup>, chiefly in that it  
29  
30 affords a framework for understanding the underlying reasons for making and  
31  
32 maintaining health behaviors<sup>30</sup>. Its key concepts involve (1) understanding of health  
33  
34 risks and benefits, (2) perceived self-efficacy of being able to control one's own  
35  
36 health habits, (3) projected costs and benefits or expected outcomes, (4) specified  
37  
38 health goals with short- and long-term intentions to engage in the behavior, (5)  
39  
40 perceived facilitators and social support, and (6) barriers to instituting change<sup>29 30</sup>.  
41  
42 In the present study, we developed the exercise program applying the first 5  
43  
44 concepts.  
45  
46  
47  
48  
49

50  
51 We will also provide the participant a brochure as a reminder to exercise and  
52  
53 will check the type of physical activity they engage in in daily life (Figure 4). When  
54  
55 developing the habit-B program, we collaborated closely with exercise scientists,  
56  
57 oncologists, physical therapists, nurses, mental health practitioners, and breast  
58  
59  
60

1  
2  
3  
4  
5  
6 cancer survivors.  
7  
8  
9

## 10 Control group

11  
12  
13 The control group will be provided a wearable device and setup support  
14  
15  
16 at the start of intervention. Self-monitoring using the wearable device will be  
17  
18 recommended during the trial period. While there are no reports of increasing  
19  
20  $VO_{2peak}$  with the use of a wearable device alone, other reports have ruled out their  
21  
22 efficacy with regard to effects on exercise habits<sup>31</sup>. In this study, the wearable  
23  
24 devices are used only to monitor physical activity in the control group.  
25  
26  
27  
28  
29  
30

## 31 PROCEDURE

### 32 Data collection, management, monitoring, and auditing

33  
34 We will collect all data except qualitative interview data, blood samples,  
35  
36 fecal samples, and medical economic costs through the e-PRO system. Those who  
37  
38 provide consent will be enrolled in the app-based e-PRO system on their  
39  
40 smartphone. If the entered data is insufficient, enrollment will not be accepted  
41  
42 until all fields are completed at baseline. The electronic data capture system will be  
43  
44 used for data management and central monitoring. Because this exercise program  
45  
46 will not be invasive, there is no need to establish a data monitoring committee or  
47  
48 to complete auditing in this study.  
49  
50  
51  
52  
53  
54  
55  
56  
57  
58  
59  
60

### Random assignment and assignment adjustment factors

1  
2  
3  
4  
5  
6 After enrollment and the additional input of the  $VO_{2peak}$  value, patients  
7  
8 will be randomly assigned. In the process of random assignment,  $VO_{2peak}$  (obtained  
9  
10 from the baseline measurement performed after obtaining informed consent) and  
11  
12 age will be used as assignment adjustment factors, and automatic assignment will  
13  
14 be performed using the data center's assignment feature. Only the measurer will  
15  
16 be blinded in this study, because interventions differ for the intervention group  
17  
18 and control group.  
19  
20  
21  
22  
23  
24  
25

### 26 **Dataset availability**

27  
28 The data sharing policy in this study is defined with reference to the  
29  
30 example proposed by the International Committee of Medical Journal Editors  
31  
32 (ICMJE): Individual participant data will be made publicly available for a 5-year  
33  
34 period through the University Hospital Medical Information Network – Individual  
35  
36 Case Data Repository (UMIN-ICDR) (<https://www.umin.ac.jp/icdr/index-j.html>).  
37  
38  
39  
40  
41  
42  
43

### 44 **Concomitant treatments**

45  
46 There are no regulated concomitant therapies or supportive therapies in  
47  
48 this study.  
49  
50  
51  
52

### 53 **Stopping rules for participants**

54  
55 Situations in which the intervention protocol is terminated for any of the  
56  
57 following reasons will be defined as stopping of the protocol intervention: (1)  
58  
59  
60

1  
2  
3  
4  
5  
6 dropping out due to withdrawal of consent or inability to measure the primary  
7  
8 endpoint ( $VO_{2peak}$ ); (2) if a primary physician deems it necessary to stop the  
9  
10 protocol intervention for a participant due to adverse events such as stress; (3)  
11  
12 death of the patient during the protocol intervention period; (4) sudden worsening  
13  
14 of the participant's condition after enrollment or discovery of a protocol violation  
15  
16 or ineligibility. A researcher will report the reason for stopping the protocol  
17  
18 intervention to the data center. In this event, as long as consent is not withdrawn,  
19  
20 follow-up including the questionnaire survey will be continued.  
21  
22  
23  
24  
25  
26  
27  
28

### 29 **Stopping of the assessment**

30  
31 Situations in which the participant declines assessment will effectively  
32  
33 stop the assessment. A researcher will confirm the possibility of implementing the  
34  
35 remaining parts of the intervention and follow-up with the participant. Stopping of  
36  
37 the assessment will be recorded along with the details of the reason for stopping.  
38  
39 As a rule, the remaining aspect of follow-up will be implemented as stipulated per  
40  
41 protocol.  
42  
43  
44  
45  
46  
47  
48

### 49 **Assessment measures**

50  
51 Table 1 shows the outcome measurement schedule.  
52  
53  
54  
55

56 Primary outcome measure: Cardiorespiratory fitness ( $VO_{2peak}$ )  
57  
58  
59  
60



1  
2  
3  
4  
5  
6  $VO_{2peak}$  is the maximum oxygen uptake observed during exercise  
7  
8 tolerance testing and is used as an indicator of cardiorespiratory fitness<sup>32 33</sup>. For  
9  
10 each participant,  $VO_{2peak}$  will be measured using the incremental multistage load  
11  
12 method with a bicycle ergometer (Ergomedic 828E, Monark, Stockholm, Sweden)  
13  
14 at 60 revolutions per min (rpm). The test will begin at 0.5 kp and increase by 0.25  
15  
16 kp per min until exhaustion. When the participant's pedal rotation speed drops  
17  
18 below 55 rpm 3 times, the test will be deemed concluded. Respiratory gases will be  
19  
20 analyzed using an automatic gas analyzer (Air Monitor AE-310S, Minato Medical  
21  
22 Science Co., Ltd., Osaka, Japan). Rated perceived exertion and HR will be recorded  
23  
24 after 45 s in each stage. The maximum value of  $VO_2$  observed during exercise will  
25  
26 be used as the  $VO_{2peak}$ .  
27  
28  
29  
30  
31  
32  
33  
34  
35

## 36 Secondary outcome measures

### 37 *Physical function*

38  
39 An alternative indicator of  $VO_{2peak}$ , the 6-min walk test (m), will be  
40  
41 performed<sup>34</sup>. Walking speed (m/s), a diagnostic criterion for sarcopenia, will also  
42  
43 be measured. A 5-m section in the middle of an 11-m line will be measured to  
44  
45 calculate walking speed<sup>35</sup>. One-repetition maximum for leg press, which reflects  
46  
47 muscle strength in the lower body, will be assessed using a leg press machine<sup>36 37</sup>.  
48  
49 After a thorough warm-up, measurements will be performed by incrementally  
50  
51 increasing the load until a weight, which can be lifted only once, is reached. Load  
52  
53 will be increased by two levels at a time. Grip strength will also be measured<sup>37 38</sup>.  
54  
55  
56  
57  
58  
59  
60

1  
2  
3  
4  
5  
6 The chair stand test, which reflects combined leg strength for the lower limbs as a  
7 whole, will be performed<sup>37 39</sup>. Participants will sit and stand from a chair for 10 s  
8 and the number of chair stands will be measured. The timed up and go test, which  
9 is used in clinical settings as an assessment of functionality as well as muscular  
10 strength, will also be performed<sup>37</sup>. The functional reach test, which as a method of  
11 assessing dynamic balance is considered an indicator of expected fall risk, will also  
12 be performed<sup>40</sup>. While keeping the hand at the same height, the participant will  
13 extend their arm forward as far as possible, without moving the feet, to make a  
14 mark at the farthest point they can reach. Lifting the heels and standing on tiptoe is  
15 allowed. The two-step test will also be performed<sup>41</sup>. This test comprehensively  
16 assesses ability to walk, including leg strength, balance, and flexibility. Based on  
17 bioelectrical impedance analysis, a body composition meter (MC-780A-N, TANITA,  
18 Japan) will be used to send a weak electrical current through the body via  
19 electrodes.  
20  
21  
22  
23  
24  
25  
26  
27  
28  
29  
30  
31  
32  
33  
34  
35  
36  
37  
38  
39  
40  
41  
42  
43

#### 44 *Physical activity level*

45  
46 The Global Physical Activity Questionnaire (GPAQ) was developed in  
47 2002 as an internationally standardized questionnaire for surveying physical  
48 activity level. The GPAQ is widely used in policy development by the World Health  
49 Organization<sup>42-44</sup>. The face validity of the Japanese version has been confirmed<sup>45</sup>.  
50  
51 In addition, as an objective measure of physical activity during the research period,  
52 resting HR, steps, distance, calorie expenditure, and the duration of each sleep  
53  
54  
55  
56  
57  
58  
59  
60

1  
2  
3  
4  
5  
6 stage as well as wake up time will be measured using an activity monitor and  
7  
8 logged for 24-h periods (Fitbit versa, Fitbit Inc., San Francisco, CA). Maximum HR  
9  
10 during exercise will also be measured to confirm whether the intensity of the  
11  
12 exercise being implemented is appropriate. The accurately measured group will be  
13  
14 defined as the group who wears the Fitbit versa at least 60% of the time during the  
15  
16 12-week intervention period.  
17  
18  
19  
20  
21  
22

### 23 *Subjective measures*

24  
25  
26 Fear of cancer recurrence (FCR) will be assessed by the overall fear index  
27  
28 score on the Concerns About Recurrence Scale<sup>46 47</sup>. This instrument comprises 4  
29  
30 items scored on a 6-point Likert scale (range, 1–6), with a higher score indicating  
31  
32 worse FCR. Depression will be assessed using the Patient Health Questionnaire-9  
33  
34 <sup>48</sup>. Fatigue will be assessed by the Cancer Fatigue Scale. Sleep will be assessed by  
35  
36 the Athens Insomnia Scale<sup>49 50</sup>. Health-related QOL will be assessed using the  
37  
38 EuroQol 5 Dimensions questionnaire<sup>51 52</sup>.  
39  
40  
41  
42  
43  
44  
45

### 46 *Biological assessments*

47  
48 To assess changes in gut microbiota, intestinal metabolites, and intestinal  
49  
50 immunity, a 1-g fecal sample will be obtained at baseline and at 12 weeks. Blood  
51  
52 concentrations of polyunsaturated fatty acids will be assessed from capillary dried  
53  
54 blood spot samples (approximately 80  $\mu$ L) at baseline<sup>53</sup>.  
55  
56  
57  
58  
59  
60

### *Medical economic costs*

For cost-benefit analysis, the number of staff, working hours, labor costs, equipment costs, office expenses, number of unexpected medical consultations, direct medical costs, and costs of other medical services used will be obtained.

### **Harms**

The intervention in this research will potentially place stress on participants physically and in terms of their time, because it will take approximately 1 h and 30 min. There will also be temporary exhaustion, although individual differences will be considered in exercise implementation. There are no financial risks associated with participation in the study.

### **Compensation**

If participants develop unexpected health issues due to study participation during or after completion of the study, treatment will be provided appropriately in the same way as standard medical care. Medical expenses at that time will be handled within the medical insurance to which the participant is enrolled. No financial compensation, except for providing the wearable device, will be given in this study.

### **DATA ANALYSIS**

1  
2  
3  
4  
5  
6 The primary endpoint,  $VO_{2peak}$ , will be calculated as follows.  
7

8  
9 Measurements will be taken at the start of the intervention (0 week) and at the  
10  
11 conclusion of the intervention (12 weeks). The analysis set for primary analyses  
12  
13 will consist of all randomized subjects. After completing primary endpoint data  
14  
15 locking, analyses centering on the primary endpoint will be performed. The  
16  
17 objective of primary analysis in this study is to investigate whether the habit-B  
18  
19 program group (trial treatment group) surpasses the group receiving treatment as  
20  
21 usual (control) in  $VO_{2peak}$  the primary endpoint. One-sided tests will be used,  
22  
23 because, if the trial intervention group is inferior to the control group, it is not  
24  
25 important in this trial whether that difference is statistically significant. The trial  
26  
27 will adopt a one-sided significance level of 2.5%. A between-groups comparison  
28  
29 will be performed using an independent two-sample t-test to determine the  
30  
31 significance of amount of change in  $VO_{2peak}$  (mL/kg/min) from 0 week to 12 weeks  
32  
33 (after intervention completion) between the trial intervention and the control  
34  
35 groups. Secondary endpoint analyses will be performed with the goal of  
36  
37 supplementing the primary analyses. Once all data has been locked following  
38  
39 conclusion of the primary analysis period and follow-up, final analyses will be  
40  
41 performed.  
42  
43  
44  
45  
46  
47  
48  
49  
50  
51

### 52 53 **Sample size estimation**

54  
55  
56 The main hypothesis of this study is that the intervention group will  
57  
58 significantly surpass the control group in terms of the amount of change in  $VO_{2peak}$   
59  
60

1  
2  
3  
4  
5  
6 from 0 week to 12 weeks. Regarding the clinical significance of the results of an  
7  
8 exercise program, it is common to use an increase of 10% in  $VO_{2peak}$  to evaluate the  
9  
10 effects of an exercise program<sup>54</sup>. As such, an increase of 10% from  $VO_{2peak}$  at the  
11  
12 start of exercise has been established for this trial. According to a previous study of  
13  
14 intervention similar to that in the present study<sup>55</sup>, the standard deviation for the  
15  
16  $VO_{2peak}$  of the intervention group was 2.6 mL/kg/min. Based on the above  
17  
18 hypothesis, by estimating the number of subjects required for a one-sided 2.5%  
19  
20 and a power of 80% in the analysis, 28 individuals per group are necessary for a  
21  
22 total of 56 in both groups (SAS 9.4 software; SAS Institute Inc., Cary, NC). With the  
23  
24 estimation that 4 participants will drop out, enrollment of 60 patients is planned.  
25  
26  
27  
28  
29  
30  
31  
32

### 33 **Study period**

34  
35  
36 The study period of this trial will be from April 2019 to March 2021; the  
37  
38 participant entry period will be from April 2019 to March 2020. Study enrolment,  
39  
40 intervention, and data collection are ongoing.  
41  
42  
43  
44  
45

### 46 **PATIENT AND PUBLIC INVOLVEMENT STATEMENT**

47  
48 This study protocol was designed with the involvement of a breast cancer  
49  
50 survivor who participated in this study as a researcher and coauthor. She  
51  
52 discussed issues with other survivors in instances where survivors' preferences  
53  
54 and opinions should be considered. In the process of creating the habit-B program,  
55  
56  
57  
58  
59  
60

1  
2  
3  
4  
5  
6 we conducted a preliminary confirmation of the feasibility and safety of this  
7  
8 program in 5 breast cancer survivors.  
9

### 10 11 12 13 **ETHICAL CONSIDERATIONS AND DISSEMINATION** 14

15  
16 The protocol was approved by the Institutional Review Board of the  
17  
18 National Cancer Center Research Ethical Review Committee on 28 February 2019  
19  
20 (ID: 2018-274). The results obtained will be submitted for publication in a peer-  
21  
22 reviewed international journal, and the main relevant findings will be presented at  
23  
24 conferences.  
25  
26  
27  
28  
29  
30  
31  
32  
33  
34  
35  
36  
37  
38  
39  
40  
41  
42  
43  
44  
45  
46  
47  
48  
49  
50  
51  
52  
53  
54  
55  
56  
57  
58  
59  
60

## DISCUSSION

An excellent review by Shapiro et al. affirms the positive role that high levels of physical activity play in improving not only health-related QOL and symptom management (e.g., chronic pain, fatigue, insomnia, sexual dysfunction, metabolic syndrome, bone loss, cognitive dysfunction, and depression), but also return to work in cancer survivors<sup>3</sup>. In addition, increased cardiorespiratory fitness may decrease all-cause mortality among cancer survivors<sup>12,56</sup>. However, there are currently no effective home-based exercise programs available for improving cardiorespiratory fitness for breast cancer survivors. No studies have precisely investigated cardiorespiratory fitness<sup>57</sup>, although a small pilot study did estimate  $VO_2$  based on subjective exercise intensity among Japanese breast cancer survivors. Accordingly, the present study seeks to confirm whether our originally developed home-based exercise program (habit-B program) improves  $VO_{2peak}$  compared with treatment as usual in sedentary breast cancer survivors in Japan. With the assumption that the program will be widely implemented if successful, it was designed to be (1) home based, (2) quick to implement (only 10 min in total), (3) use only body weight exercises involving the lower limbs, and (4) utilize a wearable device for which personalized ICT support is available. We believe that no similar studies have been implemented.

If it is found that the habit-B program is effective in increasing  $VO_{2peak}$ , we will then proceed to the next trial, aiming for its widespread implementation in society. Specifically, the aims of the next study will be (1) to investigate whether



1  
2  
3  
4  
5  
6 intervention using the program developed in this research but presented in a  
7  
8 simpler format is effective in establishing exercise habits and (2) to assess whether  
9  
10 the program can be implemented in societies in Eastern Asia, including in both  
11  
12 urban and rural Japan and other East Asian countries.  
13  
14

15  
16 We strongly believe that a successful support team comprising specialists in  
17  
18 the field of exercise science, medicine, rehabilitation, nursing, and patient  
19  
20 advocacy, as involved in this study, will provide a new horizon in cancer  
21  
22 survivorship care.  
23  
24  
25  
26  
27  
28  
29  
30  
31  
32  
33  
34  
35  
36  
37  
38  
39  
40  
41  
42  
43  
44  
45  
46  
47  
48  
49  
50  
51  
52  
53  
54  
55  
56  
57  
58  
59  
60

## Acknowledgements

We sincerely thank Dr. Hiroji Iwata, Dr. Hirokazu Arai, Ms. Noriko Watanabe, Dr. Noriaki Tatematsu, Dr. Hikaru Ihira, Mr. Tomoyasu Chigahara, Dr. Taro Ueno, Dr. Shinji Fukuda, and Dr. Eiko Saito for their generous support for the study. We also thank Ms. Ayako Sato for her role as an exercise model.

**Contributors** KT, EO, RO, YS, TK, and YM conceived the study and drafted the original protocol. KT, EO, RO, YS, TS, AK, TK, and YM participated in refining the protocol. AK played a major role in the statistical analysis. KT, EO, TK, and NS contributed to developing the exercise program. EO and YM drafted the manuscript. All authors participated in, read, and approved the final manuscript.

**Funding** This study is supported by a National Cancer Center Research and Development Fund (30-A-17).

**Competing interests** EO has received research support from Nippon Suisan Kaisha, Ltd. YJM has received speaker fees from Pfizer, Mochida, Eli Lilly, Morinaga Milk, and NTT Data and is conducting collaborative research with Morinaga Milk. AK has received speaking fees from Chugai Pharmaceutical Co., Ltd. All other authors declare that they have no competing interests regarding this work.

**Ethics approval.** The protocol was approved by the Institutional Review Board of the National Cancer Center on 28 February 2019 (ID: 2018-274).

## FIGURE LEGENDS

Figure 1. Flow diagram of study participants. HIIT, high-intensity interval training; ICT, information and communication technology.

Figure 2. Study design of the habit-b program (**h**ome-based high-intensity interval training **and** **b**ehavioral modification using **i**nformation and communication **t**echnology on cardiorespiratory fitness and exercise habits for sedentary **b**reast cancer survivors). HIIT, high-intensity interval training; ICT, information and communication technology.

Figure 3. Sample of high-intensity interval training using body weight exercise.

Figure 4. Brochure reminding participants about the importance of exercise and providing instructions about physical activity in daily life.

## References

1. Denlinger CS, Sanft T, Baker KS, et al. Survivorship, Version 2.2017, NCCN Clinical Practice Guidelines in Oncology. *J Natl Compr Canc Netw* 2017;15(9):1140-63. doi: 10.6004/jnccn.2017.0146 [published Online First: 2017/09/07]
2. Public survey about cancer control in Japan. (*the Cabinet Office*); (<https://survey.gov-online.go.jp/h26/h26-gantaisaku/5.html>) (accessed on 2018/Aug./10)
3. Shapiro CL, Recht A. Side effects of adjuvant treatment of breast cancer. *The New England journal of medicine* 2001;344(26):1997-2008. doi: 10.1056/nejm200106283442607 [published Online First: 2001/06/30]
4. Denlinger CS, Carlson RW, Are M, et al. Survivorship: Introduction and Definition: Clinical Practice Guidelines in Oncology. *Journal of the National Comprehensive Cancer Network : JNCCN* 2014;12(1):34-45.
5. Rock Cheryl L, Doyle C, Demark-Wahnefried W, et al. Nutrition and physical activity guidelines for cancer survivors. *CA: A Cancer Journal for Clinicians* 2012;62(4):242-74. doi: 10.3322/caac.21142
6. Hori M MT, Shibata A, Katanoda K, Sobue T, Nishimoto H, et al. Cancer incidence and incidence rates in Japan in 2009: a study of 32 population-based cancer registries for the Monitoring of Cancer Incidence in Japan (MCIJ) project. *Japanese journal of clinical oncology* 2015;45(9):884-91.
7. Tao MH, Hainaut P, Marian C, et al. Association of prediagnostic physical activity with survival following breast cancer diagnosis: influence of TP53 mutation status. *Cancer Causes Control* 2013;24(12):2177-86. doi: 10.1007/s10552-013-0294-x [published Online First: 2013/09/27]
8. Rock CL, Flatt SW, Byers TE, et al. Results of the Exercise and Nutrition to Enhance Recovery and Good Health for You (ENERGY) Trial: A Behavioral Weight Loss Intervention in Overweight or Obese Breast Cancer Survivors. *J Clin Oncol* 2015;33(28):3169-76. doi: 10.1200/JCO.2015.61.1095 [published Online First: 2015/08/19]

- 1  
2  
3  
4  
5  
6 9. Demark-Wahnefried W, Campbell KL, Hayes SC. Weight management and its role  
7 in breast cancer rehabilitation. *Cancer* 2012;118(8 Suppl):2277-87. doi:  
8 10.1002/cncr.27466 [published Online First: 2012/04/18]  
9
- 10 10. Lee K, Kang I, Mortimer JE, et al. Effects of high-intensity interval training on  
11 vascular function in breast cancer survivors undergoing anthracycline  
12 chemotherapy: design of a pilot study. *BMJ Open* 2018;8(6):e022622. doi:  
13 10.1136/bmjopen-2018-022622 [published Online First: 2018/07/02]  
14
- 15 11. Saarto T, Sievanen H, Kellokumpu-Lehtinen P, et al. Effect of supervised and  
16 home exercise training on bone mineral density among breast cancer  
17 patients. A 12-month randomised controlled trial. *Osteoporosis*  
18 *international : a journal established as result of cooperation between the*  
19 *European Foundation for Osteoporosis and the National Osteoporosis*  
20 *Foundation of the USA* 2012;23(5):1601-12. doi: 10.1007/s00198-011-  
21 1761-4 [published Online First: 2011/09/06]  
22
- 23 12. Peel JB, Sui X, Adams SA, et al. A prospective study of cardiorespiratory fitness  
24 and breast cancer mortality. *Med Sci Sports Exerc* 2009;41(4):742-8. doi:  
25 10.1249/MSS.0b013e31818edac7 [published Online First: 2009/03/12]  
26
- 27 13. Peel AB, Thomas SM, Dittus K, et al. Cardiorespiratory fitness in breast cancer  
28 patients: a call for normative values. *Journal of the American Heart*  
29 *Association* 2014;3(1):e000432. doi: 10.1161/jaha.113.000432 [published  
30 Online First: 2014/01/15]  
31
- 32 14. Kuwabara M, Kuwabara R, Niwa K, et al. Different Risk for Hypertension,  
33 Diabetes, Dyslipidemia, and Hyperuricemia According to Level of Body  
34 Mass Index in Japanese and American Subjects. *Nutrients* 2018;10(8) doi:  
35 10.3390/nu10081011 [published Online First: 2018/08/08]  
36
- 37 15. Rogers LQ, Courneya KS, Anton PM, et al. Effects of the BEAT Cancer physical  
38 activity behavior change intervention on physical activity, aerobic fitness,  
39 and quality of life in breast cancer survivors: a multicenter randomized  
40 controlled trial. *Breast Cancer Res Treat* 2015;149(1):109-19. doi:  
41 10.1007/s10549-014-3216-z [published Online First: 2014/11/25]  
42
- 43 16. Dolan LB, Campbell K, Gelmon K, et al. Interval versus continuous aerobic  
44 exercise training in breast cancer survivors--a pilot RCT. *Support Care*  
45  
46  
47  
48  
49  
50  
51  
52  
53  
54  
55  
56  
57  
58  
59  
60

- 1  
2  
3  
4  
5  
6 *Cancer* 2016;24(1):119-27. doi: 10.1007/s00520-015-2749-y [published  
7 Online First: 2015/05/10]  
8
- 9 17. Tanaka H, Desouza CA, Jones PP, et al. Greater rate of decline in maximal  
10 aerobic capacity with age in physically active vs. sedentary healthy women.  
11 *Journal of applied physiology (Bethesda, Md : 1985)* 1997;83(6):1947-53.  
12 doi: 10.1152/jappl.1997.83.6.1947 [published Online First: 1998/02/14]  
13  
14 18. Gulati M, Pandey DK, Arnsdorf MF, et al. Exercise capacity and the risk of death  
15 in women: the St James Women Take Heart Project. *Circulation*  
16 2003;108(13):1554-9. doi: 10.1161/01.Cir.0000091080.57509.E9  
17 [published Online First: 2003/09/17]  
18  
19 19. Lee DC, Sui X, Ortega FB, et al. Comparisons of leisure-time physical activity and  
20 cardiorespiratory fitness as predictors of all-cause mortality in men and  
21 women. *British journal of sports medicine* 2011;45(6):504-10. doi:  
22 10.1136/bjism.2009.066209 [published Online First: 2010/04/27]  
23  
24 20. Tabata I, Nishimura K, Kouzaki M, et al. Effects of moderate-intensity  
25 endurance and high-intensity intermittent training on anaerobic capacity  
26 and VO2max. *Med Sci Sports Exerc* 1996;28(10):1327-30. [published Online  
27 First: 1996/10/01]  
28  
29 21. Batacan RB, Jr., Duncan MJ, Dalbo VJ, et al. Effects of high-intensity interval  
30 training on cardiometabolic health: a systematic review and meta-analysis  
31 of intervention studies. *British journal of sports medicine* 2017;51(6):494-  
32 503. doi: 10.1136/bjsports-2015-095841 [published Online First:  
33 2016/11/01]  
34  
35 22. Mallol M, Bentley DJ, Norton L, et al. Comparison of Reduced-Volume High-  
36 Intensity Interval Training and High-Volume Training on Endurance  
37 Performance in Triathletes. *International journal of sports physiology and*  
38 *performance* 2019;14(2):239-45. doi: 10.1123/ijsp.2018-0359 [published  
39 Online First: 2018/08/07]  
40  
41 23. Mugele H, Freitag N, Wilhelmi J, et al. High-intensity interval training in the  
42 therapy and aftercare of cancer patients: a systematic review with meta-  
43 analysis. *J Cancer Surviv* 2019 doi: 10.1007/s11764-019-00743-3  
44 [published Online First: 2019/02/27]  
45  
46  
47  
48  
49  
50  
51  
52  
53  
54  
55  
56  
57  
58  
59  
60

- 1  
2  
3  
4  
5  
6 24. McRae G, Payne A, Zelt JG, et al. Extremely low volume, whole-body aerobic-  
7 resistance training improves aerobic fitness and muscular endurance in  
8 females. *Applied physiology, nutrition, and metabolism = Physiologie*  
9 *appliquee, nutrition et metabolisme* 2012;37(6):1124-31. doi:  
10 10.1139/h2012-093 [published Online First: 2012/09/22]  
11  
12  
13  
14 25. Gresham G, Hendifar AE, Spiegel B, et al. Wearable activity monitors to assess  
15 performance status and predict clinical outcomes in advanced cancer  
16 patients. *npj Digital Medicine* 2018;1(1):27. doi: 10.1038/s41746-018-  
17 0032-6  
18  
19  
20  
21 26. Piercy KL, Troiano RP, Ballard RM, et al. The Physical Activity Guidelines for  
22 AmericansPhysical Activity Guidelines for AmericansPhysical Activity  
23 Guidelines for Americans. *JAMA* 2018;320(19):2020-28. doi:  
24 10.1001/jama.2018.14854  
25  
26  
27 27. Akechi T, Yamaguchi T, Uchida M, et al. Smartphone problem-solving and  
28 behavioural activation therapy to reduce fear of recurrence among patients  
29 with breast cancer (SMartphone Intervention to Lessen fear of cancer  
30 recurrence: SMILE project): protocol for a randomised controlled trial. *BMJ*  
31 *Open* 2018;8(11):e024794. doi: 10.1136/bmjopen-2018-024794 [published  
32 Online First: 2018/11/11]  
33  
34  
35  
36  
37 28. Gresham G, Schrack J, Gresham LM, et al. Wearable activity monitors in  
38 oncology trials: Current use of an emerging technology. *Contemp Clin Trials*  
39 2018;64:13-21. doi: 10.1016/j.cct.2017.11.002 [published Online First:  
40 2017/11/14]  
41  
42  
43  
44 29. Bandura A. Health promotion by social cognitive means. *Health education &*  
45 *behavior : the official publication of the Society for Public Health Education*  
46 2004;31(2):143-64. doi: 10.1177/1090198104263660 [published Online  
47 First: 2004/04/20]  
48  
49  
50  
51 30. Stacey FG, James EL, Chapman K, et al. A systematic review and meta-analysis  
52 of social cognitive theory-based physical activity and/or nutrition behavior  
53 change interventions for cancer survivors. *J Cancer Surviv* 2015;9(2):305-  
54 38. doi: 10.1007/s11764-014-0413-z [published Online First: 2014/11/30]  
55  
56  
57 31. Abedtash H, Holden RJ. Systematic review of the effectiveness of health-related  
58 behavioral interventions using portable activity sensing devices (PASDs).  
59  
60

- 1  
2  
3  
4  
5  
6 *Journal of the American Medical Informatics Association : JAMIA*  
7 2017;24(5):1002-13. doi: 10.1093/jamia/ocx006 [published Online First:  
8 2017/03/25]  
9
- 10  
11 32. Taylor HL, Buskirk E, Henschel A. Maximal oxygen intake as an objective  
12 measure of cardio-respiratory performance. *Journal of applied physiology*  
13 1955;8(1):73-80. doi: 10.1152/jappl.1955.8.1.73 [published Online First:  
14 1955/07/01]  
15  
16  
17 33. Whipp BJ, Davis JA, Torres F, et al. A test to determine parameters of aerobic  
18 function during exercise. *Journal of applied physiology: respiratory,*  
19 *environmental and exercise physiology* 1981;50(1):217-21. doi:  
20 10.1152/jappl.1981.50.1.217 [published Online First: 1981/01/01]  
21  
22  
23 34. Ross RM, Murthy JN, Wollak ID, et al. The six minute walk test accurately  
24 estimates mean peak oxygen uptake. *BMC pulmonary medicine* 2010;10:31.  
25 doi: 10.1186/1471-2466-10-31 [published Online First: 2010/05/28]  
26  
27  
28 35. Chen LK, Liu LK, Woo J, et al. Sarcopenia in Asia: consensus report of the Asian  
29 Working Group for Sarcopenia. *J Am Med Dir Assoc* 2014;15(2):95-101. doi:  
30 10.1016/j.jamda.2013.11.025 [published Online First: 2014/01/28]  
31  
32  
33 36. Schmitz KH, Ahmed RL, Troxel A, et al. Weight lifting in women with breast-  
34 cancer-related lymphedema. *The New England journal of medicine*  
35 2009;361(7):664-73. doi: 10.1056/NEJMoa0810118 [published Online  
36 First: 2009/08/14]  
37  
38  
39 37. Neil-Sztramko SE, Kirkham AA, Hung SH, et al. Aerobic capacity and upper limb  
40 strength are reduced in women diagnosed with breast cancer: a systematic  
41 review. *Journal of physiotherapy* 2014;60(4):189-200. doi:  
42 10.1016/j.jphys.2014.09.005 [published Online First: 2014/12/03]  
43  
44  
45 38. Van der Weijden-Van Doornik EM, Slot DE, Burtin C, et al. Grip Strength in  
46 Women Being Treated for Breast Cancer and Receiving Adjuvant Endocrine  
47 Therapy: Systematic Review. *Phys Ther* 2017;97(9):904-14. doi:  
48 10.1093/ptj/pzx069 [published Online First: 2017/10/04]  
49  
50  
51 39. Herrero F, San Juan AF, Fleck SJ, et al. Combined aerobic and resistance training  
52 in breast cancer survivors: A randomized, controlled pilot trial.  
53 *International journal of sports medicine* 2006;27(7):573-80. doi: 10.1055/s-  
54 2005-865848 [published Online First: 2006/06/28]  
55  
56  
57  
58  
59  
60



- 1  
2  
3  
4  
5  
6 40. Foley MP, Hasson SM. Effects of a Community-Based Multimodal Exercise  
7 Program on Health-Related Physical Fitness and Physical Function in Breast  
8 Cancer Survivors:A Pilot Study. *Integrative Cancer Therapies*  
9 2016;15(4):446-54. doi: 10.1177/1534735416639716  
10  
11  
12 41. Maruya K, Fujita H, Arai T, et al. Identifying elderly people at risk for cognitive  
13 decline by using the 2-step test. *J Phys Ther Sci* 2018;30(1):145-49. doi:  
14 10.1589/jpts.30.145  
15  
16 42. Organization WH. Global Physical Activity Surveillance [Available from:  
17 <http://www.who.int/ncds/surveillance/steps/GPAQ/en/> accessed Aug. 10  
18 2018.  
19  
20  
21  
22 43. Cleland CL, Hunter RF, Kee F, et al. Validity of the global physical activity  
23 questionnaire (GPAQ) in assessing levels and change in moderate-vigorous  
24 physical activity and sedentary behaviour. *BMC Public Health*  
25 2014;14:1255. doi: 10.1186/1471-2458-14-1255 [published Online First:  
26 2014/12/11]  
27  
28  
29  
30 44. Chu AH, Ng SH, Koh D, et al. Reliability and Validity of the Self- and Interviewer-  
31 Administered Versions of the Global Physical Activity Questionnaire  
32 (GPAQ). *PLoS One* 2015;10(9):e0136944. doi:  
33 10.1371/journal.pone.0136944 [published Online First: 2015/09/04]  
34  
35  
36  
37 45. Bull FC, Maslin TS, Armstrong T. Global physical activity questionnaire (GPAQ):  
38 nine country reliability and validity study. *Journal of physical activity &*  
39 *health* 2009;6(6):790-804. [published Online First: 2010/01/28]  
40  
41  
42 46. Vickberg SM. The Concerns About Recurrence Scale (CARS): a systematic  
43 measure of women's fears about the possibility of breast cancer recurrence.  
44 *Ann Behav Med* 2003;25(1):16-24.  
45  
46  
47 47. Momino K, Akechi T, Yamashita T, et al. Psychometric Properties of the  
48 Japanese Version of the Concerns About Recurrence Scale (CARS-J).  
49 *Japanese Journal of Clinical Oncology* 2014;44(5):456-62. doi:  
50 10.1093/jjco/hyu032  
51  
52  
53 48. Muramatsu K, Miyaoka H, Kamijima K, et al. The patient health questionnaire,  
54 Japanese version: validity according to the mini-international  
55 neuropsychiatric interview-plus. *Psychological reports* 2007;101(3 Pt  
56  
57  
58  
59  
60

- 1  
2  
3  
4  
5  
6 1):952-60. doi: 10.2466/pr0.101.3.952-960 [published Online First:  
7 2008/02/01]  
8  
9  
10 49. Okajima I, Nakajima S, Kobayashi M, et al. Development and validation of the  
11 Japanese version of the Athens Insomnia Scale. *Psychiatry and clinical*  
12 *neurosciences* 2013;67(6):420-25. doi: 10.1111/pcn.12073 [published  
13 Online First: 2013/08/05]  
14  
15 50. Soldatos CR, Dikeos DG, Paparrigopoulos TJ. Athens Insomnia Scale: validation  
16 of an instrument based on ICD-10 criteria. *Journal of psychosomatic research*  
17 2000;48(6):555-60.  
18  
19 51. Rabin R, de Charro F. EQ-5D: a measure of health status from the EuroQol  
20 Group. *Annals of medicine* 2001;33(5):337-43. [published Online First:  
21 2001/08/09]  
22  
23 52. Tsuchiya A, Ikeda S, Ikegami N, et al. Estimating an EQ-5D population value set:  
24 the case of Japan. *Health economics* 2002;11(4):341-53. doi:  
25 10.1002/hec.673 [published Online First: 2002/05/15]  
26  
27 53. Liu G, Muhlhausler BS, Gibson RA. A method for long term stabilisation of long  
28 chain polyunsaturated fatty acids in dried blood spots and its clinical  
29 application. *Prostaglandins, leukotrienes, and essential fatty acids*  
30 2014;91(6):251-60. doi: 10.1016/j.plefa.2014.09.009 [published Online  
31 First: 2014/12/03]  
32  
33 54. Scribbans TD, Vecsey S, Hankinson PB, et al. The Effect of Training Intensity on  
34 VO2max in Young Healthy Adults: A Meta-Regression and Meta-Analysis.  
35 *International journal of exercise science* 2016;9(2):230-47. [published  
36 Online First: 2016/05/18]  
37  
38 55. Courneya KS, Mackey JR, Bell GJ, et al. Randomized controlled trial of exercise  
39 training in postmenopausal breast cancer survivors: cardiopulmonary and  
40 quality of life outcomes. *J Clin Oncol* 2003;21(9):1660-8. doi:  
41 10.1200/jco.2003.04.093 [published Online First: 2003/05/02]  
42  
43 56. Jones LW, Courneya KS, Mackey JR, et al. Cardiopulmonary function and age-  
44 related decline across the breast cancer survivorship continuum. *J Clin*  
45 *Oncol* 2012;30(20):2530-7. doi: 10.1200/JCO.2011.39.9014 [published  
46 Online First: 2012/05/23]  
47  
48  
49  
50  
51  
52  
53  
54  
55  
56  
57  
58  
59  
60

1  
2  
3  
4  
5  
6 57. Okumatsu K, Tsujimoto T, Wakaba K, et al. Physical fitness level in Japanese  
7 breast cancer survivors. *Japanese Journal of Physical Fitness and Sports*  
8 *Medicine* 2018;67(2):169-76. doi: 10.7600/jspfsm.67.169  
9  
10  
11  
12  
13  
14  
15  
16  
17  
18  
19  
20  
21  
22  
23  
24  
25  
26  
27  
28  
29  
30  
31  
32  
33  
34  
35  
36  
37  
38  
39  
40  
41  
42  
43  
44  
45  
46  
47  
48  
49  
50  
51  
52  
53  
54  
55  
56  
57  
58  
59  
60

For peer review only



1  
2  
3  
4  
5  
6  
7  
8  
9  
10  
11  
12  
13  
14  
15  
16  
17  
18  
19  
20  
21  
22  
23  
24  
25  
26  
27  
28  
29  
30  
31  
32  
33  
34  
35  
36  
37  
38  
39  
40  
41  
42  
43  
44  
45  
46  
47  
48  
49  
50  
51  
52  
53  
54  
55  
56  
57  
58  
59  
60

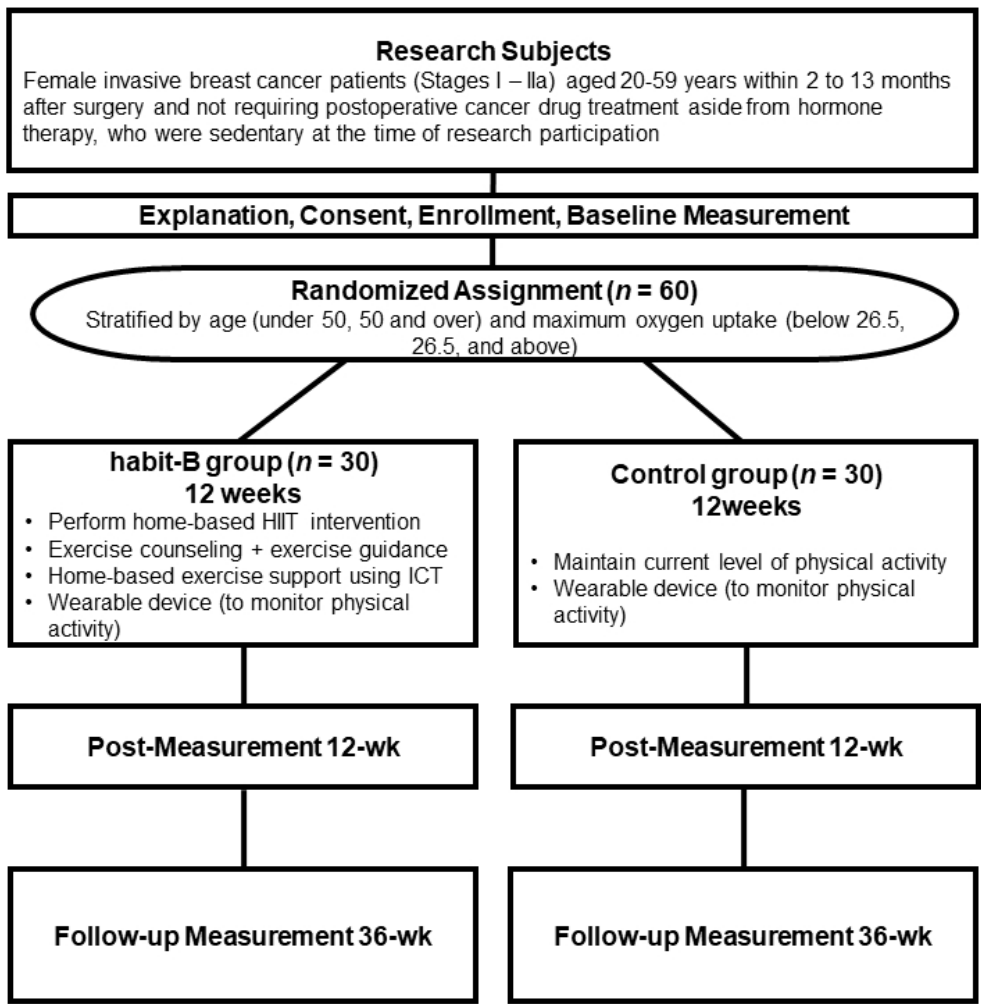

190x191mm (96 x 96 DPI)

1  
2  
3  
4  
5  
6  
7  
8  
9  
10  
11  
12  
13  
14  
15  
16  
17  
18  
19  
20  
21  
22  
23  
24  
25  
26  
27  
28  
29  
30  
31  
32  
33  
34  
35  
36  
37  
38  
39  
40  
41  
42  
43  
44  
45  
46  
47  
48  
49  
50  
51  
52  
53  
54  
55  
56  
57  
58  
59  
60

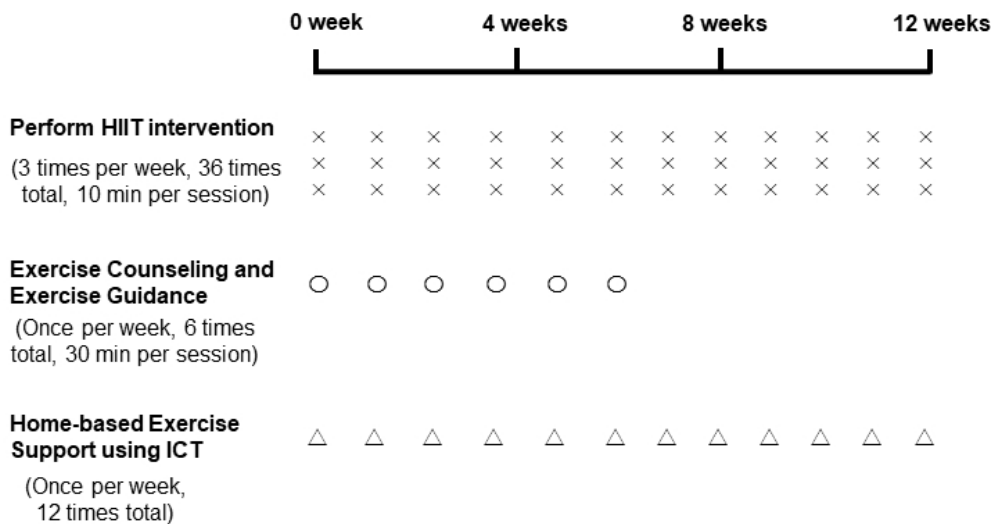

190x101mm (96 x 96 DPI)

1  
2  
3  
4  
5  
6  
7  
8  
9  
10  
11  
12  
13  
14  
15  
16  
17  
18  
19  
20  
21  
22  
23  
24  
25  
26  
27  
28  
29  
30  
31  
32  
33  
34  
35  
36  
37  
38  
39  
40  
41  
42  
43  
44  
45  
46  
47  
48  
49  
50  
51  
52  
53  
54  
55  
56  
57  
58  
59  
60

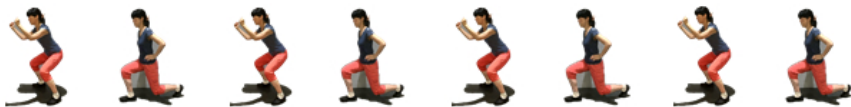

|                             |       |      |       |      |       |      |       |      |       |      |       |      |       |      |       |                       |
|-----------------------------|-------|------|-------|------|-------|------|-------|------|-------|------|-------|------|-------|------|-------|-----------------------|
| 3 min and 10 sec<br>Warm up | Squat | rest | Lunge | rest | Squat | rest | Lunge | rest | Squat | rest | Lunge | rest | Squat | rest | Lunge | 3 min<br>cool<br>down |
|                             | 20 s  | 10 s | 20 s  |                       |

10 min

184x43mm (96 x 96 DPI)

1  
2  
3  
4  
5  
6  
7  
8  
9  
10  
11  
12  
13  
14  
15  
16  
17  
18  
19  
20  
21  
22  
23  
24  
25  
26  
27  
28  
29  
30  
31  
32  
33  
34  
35  
36  
37  
38  
39  
40  
41  
42  
43  
44  
45  
46  
47  
48  
49  
50  
51  
52  
53  
54  
55  
56  
57  
58  
59  
60



NCC 法政大学  
habit-B

1人ではなくみんなで頑張りましょう!

【TSUKIDA habit-B プロジェクト】  
癌後、乳がんや乳がんサバイバー向けの運動習慣を身につけるための運動プログラムを開発しています。

〒104-8504 東京都中央区豊洲4-1-1  
https://www.ncc.go.jp/StepB/06main/06habits\_bproject/01/01/010178020.html  
番号：17000000 habit-Bプロジェクト  
実行責任者：中野 悠子 実行委員：中野 悠子 法政大学 健康増進部



*Let's training*

乳がんサバイバーのあなたへ

## 体力向上のためのトレーニング

自宅で簡単・安心トレーニングのご案内



こんなことはありませんか？

|                                                                                                                                                                                   |                                                                                                                                                                                       |
|-----------------------------------------------------------------------------------------------------------------------------------------------------------------------------------|---------------------------------------------------------------------------------------------------------------------------------------------------------------------------------------|
| <ul style="list-style-type: none"> <li><input type="checkbox"/> 体力の低下を感じている</li> <li><input type="checkbox"/> 疲れやすくなる</li> <li><input type="checkbox"/> そろそろ運動をはじめてみたい</li> </ul> | <ul style="list-style-type: none"> <li><input type="checkbox"/> いつもの体力に戻したい</li> <li><input type="checkbox"/> 一人でトレーニングは不安だ</li> <li><input type="checkbox"/> 毎日を楽しんで過ごしたい</li> </ul> |
|-----------------------------------------------------------------------------------------------------------------------------------------------------------------------------------|---------------------------------------------------------------------------------------------------------------------------------------------------------------------------------------|

毎日の生活に運動を取り入れましょう!

### 疲れにくいカラダをつくる4つの運動

心臓機能を高く維持することは疲れにくいカラダをつくり、乳がんサバイバーにとってきわめて重要です。下記の運動は、ふとももやおしりの筋肉を鍛錬しながら丁寧に実施することで運動中に心拍数を上昇させて心臓機能を向上させます。さらにこれらの運動は肥満やサルコペニアの予防にも役立ちます。

**Step 1**



**Point**  
膝よりつま先が伸びないように注意してください。

**Step 2**



**Point**  
膝よりつま先が伸びないように注意してください。

**Step 3**



**Point**  
膝よりつま先が伸びないように注意してください。

**Step 4**



**Point**  
肘が肩の真下に来るように注意してください。

|                                                                                         |                                                                                  |                                                                                                                  |                                                                                                                                                                               |
|-----------------------------------------------------------------------------------------|----------------------------------------------------------------------------------|------------------------------------------------------------------------------------------------------------------|-------------------------------------------------------------------------------------------------------------------------------------------------------------------------------|
| <p><b>スクワット</b></p> <p>足を肩幅からやや広めに並び、お尻を後ろに突き出すながら、上半身を倒さないように膝の角度が伸びないように注意してください。</p> | <p><b>フロントランジ</b></p> <p>片足ずつ足を前に出します。両足を伸ばして、膝が出た側の膝がつま先より前に出ないように膝を曲げましょう。</p> | <p><b>スクーターズランジ</b></p> <p>両足のジャンプ動作ができません。膝へ落とすは股関節を伸ばすように注意しましょう。腰骨の動き、膝とつま先の動きを確認して、両足同時にスクーターズランジにしましょう。</p> | <p><b>プッシュアップ</b></p> <p>両足を肩幅より狭く開く運動です。<br/>①しゃがみこんで立ち上がり<br/>②手を肩幅より狭く開いて足を肩幅に伸ばして、両足で足先の姿勢をとる<br/>③両肘を肩の真下に来るように注意して、しゃがみこんで立ち上がり<br/>④両肘を肩の真下に来るように注意して、しゃがみこんで立ち上がり</p> |
|-----------------------------------------------------------------------------------------|----------------------------------------------------------------------------------|------------------------------------------------------------------------------------------------------------------|-------------------------------------------------------------------------------------------------------------------------------------------------------------------------------|

166x236mm (96 x 96 DPI)



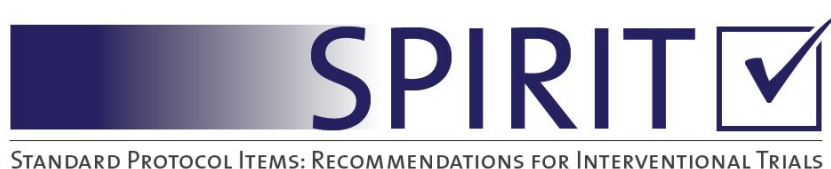

STANDARD PROTOCOL ITEMS: RECOMMENDATIONS FOR INTERVENTIONAL TRIALS

SPIRIT 2013 Checklist: Recommended items to address in a clinical trial protocol and related documents\*

| Section/item                      | Item No | Description                                                                                                                                                                                                                                                                              |
|-----------------------------------|---------|------------------------------------------------------------------------------------------------------------------------------------------------------------------------------------------------------------------------------------------------------------------------------------------|
| <b>Administrative information</b> |         |                                                                                                                                                                                                                                                                                          |
| Title                             | 1       | Descriptive title identifying the study design, population, interventions, and, if applicable, trial acronym                                                                                                                                                                             |
| Trial registration                | 2a      | Trial identifier and registry name. If not yet registered, name of intended registry                                                                                                                                                                                                     |
|                                   | 2b      | All items from the World Health Organization Trial Registration Data Set                                                                                                                                                                                                                 |
| Protocol version                  | 3       | Date and version identifier                                                                                                                                                                                                                                                              |
| Funding                           | 4       | Sources and types of financial, material, and other support                                                                                                                                                                                                                              |
| Roles and responsibilities        | 5a      | Names, affiliations, and roles of protocol contributors                                                                                                                                                                                                                                  |
|                                   | 5b      | Name and contact information for the trial sponsor                                                                                                                                                                                                                                       |
|                                   | 5c      | Role of study sponsor and funders, if any, in study design; collection, management, analysis, and interpretation of data; writing of the report; and the decision to submit the report for publication, including whether they will have ultimate authority over any of these activities |
|                                   | 5d      | Composition, roles, and responsibilities of the coordinating centre, steering committee, endpoint adjudication committee, data management team, and other individuals or groups overseeing the trial, if applicable (see Item 21a for data monitoring committee)                         |
| <b>Introduction</b>               |         |                                                                                                                                                                                                                                                                                          |
| Background and rationale          | 6a      | Description of research question and justification for undertaking the trial, including summary of relevant studies (published and unpublished) examining benefits and harms for each intervention                                                                                       |
|                                   | 6b      | Explanation for choice of comparators                                                                                                                                                                                                                                                    |
| Objectives                        | 7       | Specific objectives or hypotheses                                                                                                                                                                                                                                                        |
| Trial design                      | 8       | Description of trial design including type of trial (eg, parallel group, crossover, factorial, single group), allocation ratio, and framework (eg, superiority, equivalence, noninferiority, exploratory)                                                                                |

## Methods: Participants, interventions, and outcomes

|                      |     |                                                                                                                                                                                                                                                                                                                                                                                |
|----------------------|-----|--------------------------------------------------------------------------------------------------------------------------------------------------------------------------------------------------------------------------------------------------------------------------------------------------------------------------------------------------------------------------------|
| Study setting        | 9   | Description of study settings (eg, community clinic, academic hospital) and list of countries where data will be collected. Reference to where list of study sites can be obtained                                                                                                                                                                                             |
| Eligibility criteria | 10  | Inclusion and exclusion criteria for participants. If applicable, eligibility criteria for study centres and individuals who will perform the interventions (eg, surgeons, psychotherapists)                                                                                                                                                                                   |
| Interventions        | 11a | Interventions for each group with sufficient detail to allow replication, including how and when they will be administered                                                                                                                                                                                                                                                     |
|                      | 11b | Criteria for discontinuing or modifying allocated interventions for a given trial participant (eg, drug dose change in response to harms, participant request, or improving/worsening disease)                                                                                                                                                                                 |
|                      | 11c | Strategies to improve adherence to intervention protocols, and any procedures for monitoring adherence (eg, drug tablet return, laboratory tests)                                                                                                                                                                                                                              |
|                      | 11d | Relevant concomitant care and interventions that are permitted or prohibited during the trial                                                                                                                                                                                                                                                                                  |
| Outcomes             | 12  | Primary, secondary, and other outcomes, including the specific measurement variable (eg, systolic blood pressure), analysis metric (eg, change from baseline, final value, time to event), method of aggregation (eg, median, proportion), and time point for each outcome. Explanation of the clinical relevance of chosen efficacy and harm outcomes is strongly recommended |
| Participant timeline | 13  | Time schedule of enrolment, interventions (including any run-ins and washouts), assessments, and visits for participants. A schematic diagram is highly recommended (see Figure)                                                                                                                                                                                               |
| Sample size          | 14  | Estimated number of participants needed to achieve study objectives and how it was determined, including clinical and statistical assumptions supporting any sample size calculations                                                                                                                                                                                          |
| Recruitment          | 15  | Strategies for achieving adequate participant enrolment to reach target sample size                                                                                                                                                                                                                                                                                            |

## Methods: Assignment of interventions (for controlled trials)

### Allocation:

|                     |     |                                                                                                                                                                                                                                                                                                                                                          |
|---------------------|-----|----------------------------------------------------------------------------------------------------------------------------------------------------------------------------------------------------------------------------------------------------------------------------------------------------------------------------------------------------------|
| Sequence generation | 16a | Method of generating the allocation sequence (eg, computer-generated random numbers), and list of any factors for stratification. To reduce predictability of a random sequence, details of any planned restriction (eg, blocking) should be provided in a separate document that is unavailable to those who enrol participants or assign interventions |
|---------------------|-----|----------------------------------------------------------------------------------------------------------------------------------------------------------------------------------------------------------------------------------------------------------------------------------------------------------------------------------------------------------|

|    |                |     |                                                                         |
|----|----------------|-----|-------------------------------------------------------------------------|
| 1  |                |     |                                                                         |
| 2  | Allocation     | 16b | Mechanism of implementing the allocation sequence (eg, central          |
| 3  | concealment    |     | telephone; sequentially numbered, opaque, sealed envelopes),            |
| 4  | mechanism      |     | describing any steps to conceal the sequence until interventions are    |
| 5  |                |     | assigned                                                                |
| 6  |                |     |                                                                         |
| 7  | Implementation | 16c | Who will generate the allocation sequence, who will enrol participants, |
| 8  |                |     | and who will assign participants to interventions                       |
| 9  |                |     |                                                                         |
| 10 | Blinding       | 17a | Who will be blinded after assignment to interventions (eg, trial        |
| 11 | (masking)      |     | participants, care providers, outcome assessors, data analysts), and    |
| 12 |                |     | how                                                                     |
| 13 |                |     |                                                                         |
| 14 |                |     |                                                                         |
| 15 |                | 17b | If blinded, circumstances under which unblinding is permissible, and    |
| 16 |                |     | procedure for revealing a participant's allocated intervention during   |
| 17 |                |     | the trial                                                               |
| 18 |                |     |                                                                         |

### Methods: Data collection, management, and analysis

|    |                 |     |                                                                          |
|----|-----------------|-----|--------------------------------------------------------------------------|
| 21 |                 |     |                                                                          |
| 22 | Data collection | 18a | Plans for assessment and collection of outcome, baseline, and other      |
| 23 | methods         |     | trial data, including any related processes to promote data quality (eg, |
| 24 |                 |     | duplicate measurements, training of assessors) and a description of      |
| 25 |                 |     | study instruments (eg, questionnaires, laboratory tests) along with      |
| 26 |                 |     | their reliability and validity, if known. Reference to where data        |
| 27 |                 |     | collection forms can be found, if not in the protocol                    |
| 28 |                 |     |                                                                          |
| 29 |                 |     |                                                                          |
| 30 |                 | 18b | Plans to promote participant retention and complete follow-up,           |
| 31 |                 |     | including list of any outcome data to be collected for participants who  |
| 32 |                 |     | discontinue or deviate from intervention protocols                       |
| 33 |                 |     |                                                                          |
| 34 | Data            | 19  | Plans for data entry, coding, security, and storage, including any       |
| 35 | management      |     | related processes to promote data quality (eg, double data entry;        |
| 36 |                 |     | range checks for data values). Reference to where details of data        |
| 37 |                 |     | management procedures can be found, if not in the protocol               |
| 38 |                 |     |                                                                          |
| 39 |                 |     |                                                                          |
| 40 | Statistical     | 20a | Statistical methods for analysing primary and secondary outcomes.        |
| 41 | methods         |     | Reference to where other details of the statistical analysis plan can be |
| 42 |                 |     | found, if not in the protocol                                            |
| 43 |                 |     |                                                                          |
| 44 |                 |     |                                                                          |
| 45 |                 | 20b | Methods for any additional analyses (eg, subgroup and adjusted           |
| 46 |                 |     | analyses)                                                                |
| 47 |                 |     |                                                                          |
| 48 |                 | 20c | Definition of analysis population relating to protocol non-adherence     |
| 49 |                 |     | (eg, as randomised analysis), and any statistical methods to handle      |
| 50 |                 |     | missing data (eg, multiple imputation)                                   |
| 51 |                 |     |                                                                          |

### Methods: Monitoring

|    |                 |     |                                                                      |
|----|-----------------|-----|----------------------------------------------------------------------|
| 52 |                 |     |                                                                      |
| 53 |                 |     |                                                                      |
| 54 | Data monitoring | 21a | Composition of data monitoring committee (DMC); summary of its role  |
| 55 |                 |     | and reporting structure; statement of whether it is independent from |
| 56 |                 |     | the sponsor and competing interests; and reference to where further  |
| 57 |                 |     | details about its charter can be found, if not in the protocol.      |
| 58 |                 |     | Alternatively, an explanation of why a DMC is not needed             |
| 59 |                 |     |                                                                      |
| 60 |                 |     |                                                                      |

|    |          |     |                                                                        |
|----|----------|-----|------------------------------------------------------------------------|
| 1  |          | 21b | Description of any interim analyses and stopping guidelines, including |
| 2  |          |     | who will have access to these interim results and make the final       |
| 3  |          |     | decision to terminate the trial                                        |
| 4  |          |     |                                                                        |
| 5  |          |     |                                                                        |
| 6  | Harms    | 22  | Plans for collecting, assessing, reporting, and managing solicited and |
| 7  |          |     | spontaneously reported adverse events and other unintended effects     |
| 8  |          |     | of trial interventions or trial conduct                                |
| 9  |          |     |                                                                        |
| 10 |          |     |                                                                        |
| 11 | Auditing | 23  | Frequency and procedures for auditing trial conduct, if any, and       |
| 12 |          |     | whether the process will be independent from investigators and the     |
| 13 |          |     | sponsor                                                                |
| 14 |          |     |                                                                        |

### 15 Ethics and dissemination

|    |                   |     |                                                                               |
|----|-------------------|-----|-------------------------------------------------------------------------------|
| 16 |                   |     |                                                                               |
| 17 | Research ethics   | 24  | Plans for seeking research ethics committee/institutional review board        |
| 18 | approval          |     | (REC/IRB) approval                                                            |
| 19 |                   |     |                                                                               |
| 20 |                   |     |                                                                               |
| 21 | Protocol          | 25  | Plans for communicating important protocol modifications (eg,                 |
| 22 | amendments        |     | changes to eligibility criteria, outcomes, analyses) to relevant parties      |
| 23 |                   |     | (eg, investigators, REC/IRBs, trial participants, trial registries, journals, |
| 24 |                   |     | regulators)                                                                   |
| 25 |                   |     |                                                                               |
| 26 | Consent or assent | 26a | Who will obtain informed consent or assent from potential trial               |
| 27 |                   |     | participants or authorised surrogates, and how (see Item 32)                  |
| 28 |                   |     |                                                                               |
| 29 |                   | 26b | Additional consent provisions for collection and use of participant data      |
| 30 |                   |     | and biological specimens in ancillary studies, if applicable                  |
| 31 |                   |     |                                                                               |
| 32 |                   |     |                                                                               |
| 33 | Confidentiality   | 27  | How personal information about potential and enrolled participants will       |
| 34 |                   |     | be collected, shared, and maintained in order to protect confidentiality      |
| 35 |                   |     | before, during, and after the trial                                           |
| 36 |                   |     |                                                                               |
| 37 | Declaration of    | 28  | Financial and other competing interests for principal investigators for       |
| 38 | interests         |     | the overall trial and each study site                                         |
| 39 |                   |     |                                                                               |
| 40 |                   |     |                                                                               |
| 41 | Access to data    | 29  | Statement of who will have access to the final trial dataset, and             |
| 42 |                   |     | disclosure of contractual agreements that limit such access for               |
| 43 |                   |     | investigators                                                                 |
| 44 |                   |     |                                                                               |
| 45 | Ancillary and     | 30  | Provisions, if any, for ancillary and post-trial care, and for                |
| 46 | post-trial care   |     | compensation to those who suffer harm from trial participation                |
| 47 |                   |     |                                                                               |
| 48 | Dissemination     | 31a | Plans for investigators and sponsor to communicate trial results to           |
| 49 | policy            |     | participants, healthcare professionals, the public, and other relevant        |
| 50 |                   |     | groups (eg, via publication, reporting in results databases, or other         |
| 51 |                   |     | data sharing arrangements), including any publication restrictions            |
| 52 |                   |     |                                                                               |
| 53 |                   |     |                                                                               |
| 54 |                   | 31b | Authorship eligibility guidelines and any intended use of professional        |
| 55 |                   |     | writers                                                                       |
| 56 |                   |     |                                                                               |
| 57 |                   | 31c | Plans, if any, for granting public access to the full protocol, participant-  |
| 58 |                   |     | level dataset, and statistical code                                           |
| 59 |                   |     |                                                                               |
| 60 |                   |     |                                                                               |

**Appendices**

|                            |    |                                                                                                                                                                                                |
|----------------------------|----|------------------------------------------------------------------------------------------------------------------------------------------------------------------------------------------------|
| Informed consent materials | 32 | Model consent form and other related documentation given to participants and authorised surrogates                                                                                             |
| Biological specimens       | 33 | Plans for collection, laboratory evaluation, and storage of biological specimens for genetic or molecular analysis in the current trial and for future use in ancillary studies, if applicable |

---

\*It is strongly recommended that this checklist be read in conjunction with the SPIRIT 2013 Explanation & Elaboration for important clarification on the items. Amendments to the protocol should be tracked and dated. The SPIRIT checklist is copyrighted by the SPIRIT Group under the Creative Commons "[Attribution-NonCommercial-NoDerivs 3.0 Unported](#)" license.

For peer review only

# BMJ Open

## Effect of home-based high-intensity interval training and behavioral modification using information and communication technology on cardiorespiratory fitness and exercise habits among sedentary breast cancer survivors: the habit-B study protocol for a randomized controlled trial

|                                 |                                                                                                                                                                                                                                                                                                                                                                                                                                                                                                                                                                                                                                                                                                                                                                                                                                                                                                                                                                                                                                                                                                                                                                                            |
|---------------------------------|--------------------------------------------------------------------------------------------------------------------------------------------------------------------------------------------------------------------------------------------------------------------------------------------------------------------------------------------------------------------------------------------------------------------------------------------------------------------------------------------------------------------------------------------------------------------------------------------------------------------------------------------------------------------------------------------------------------------------------------------------------------------------------------------------------------------------------------------------------------------------------------------------------------------------------------------------------------------------------------------------------------------------------------------------------------------------------------------------------------------------------------------------------------------------------------------|
| Journal:                        | <i>BMJ Open</i>                                                                                                                                                                                                                                                                                                                                                                                                                                                                                                                                                                                                                                                                                                                                                                                                                                                                                                                                                                                                                                                                                                                                                                            |
| Manuscript ID                   | bmjopen-2019-030911.R1                                                                                                                                                                                                                                                                                                                                                                                                                                                                                                                                                                                                                                                                                                                                                                                                                                                                                                                                                                                                                                                                                                                                                                     |
| Article Type:                   | Protocol                                                                                                                                                                                                                                                                                                                                                                                                                                                                                                                                                                                                                                                                                                                                                                                                                                                                                                                                                                                                                                                                                                                                                                                   |
| Date Submitted by the Author:   | 13-Jun-2019                                                                                                                                                                                                                                                                                                                                                                                                                                                                                                                                                                                                                                                                                                                                                                                                                                                                                                                                                                                                                                                                                                                                                                                |
| Complete List of Authors:       | <p>Tsuji, Katsunori; National Cancer Center Japan, Division of Health Care Research, Center for Public Health Sciences<br/> Ochi, Eisuke; National Cancer Center Japan, Division of Health Care Research, Center for Public Health Sciences; Hosei University, Faculty of Bioscience and Applied Chemistry<br/> Okubo, Ryo; National Cancer Center Japan, Division of Health Care Research, Center for Public Health Sciences<br/> Shimizu, Yoichi; National Cancer Center Japan, Division of Health Care Research, Center for Public Health Sciences<br/> Kuchiba, Aya; National Cancer Center Japan, Division of Biostatistical Research, Center for Public Health Sciences; National Cancer Center Japan, Biostatistics Division, Center for Research Administration and Support<br/> Ueno, Taro; SUSMED, Inc.<br/> Shimazu, Taichi; National Cancer Center Japan, Division of Prevention, Center for Public Health Sciences<br/> Kinoshita, Takayuki; National Cancer Center Hospital, Department of Breast Surgery<br/> Sakurai, Naomi; Cancer Solutions<br/> Matsuoka, Yutaka; National Cancer Center Japan, Division of Health Care Research, Center for Public Health Sciences</p> |
| <b>Primary Subject Heading</b>: | Sports and exercise medicine                                                                                                                                                                                                                                                                                                                                                                                                                                                                                                                                                                                                                                                                                                                                                                                                                                                                                                                                                                                                                                                                                                                                                               |
| Secondary Subject Heading:      | Mental health, Oncology                                                                                                                                                                                                                                                                                                                                                                                                                                                                                                                                                                                                                                                                                                                                                                                                                                                                                                                                                                                                                                                                                                                                                                    |
| Keywords:                       | Breast tumours < ONCOLOGY, SPORTS MEDICINE, PREVENTIVE MEDICINE, CLINICAL PHYSIOLOGY                                                                                                                                                                                                                                                                                                                                                                                                                                                                                                                                                                                                                                                                                                                                                                                                                                                                                                                                                                                                                                                                                                       |
|                                 |                                                                                                                                                                                                                                                                                                                                                                                                                                                                                                                                                                                                                                                                                                                                                                                                                                                                                                                                                                                                                                                                                                                                                                                            |

SCHOLARONE™  
Manuscripts

1  
2  
3  
4  
5  
6  
7  
8  
9  
10  
11  
12  
13  
14  
15  
16  
17  
18  
19  
20  
21  
22  
23  
24  
25  
26  
27  
28  
29  
30  
31  
32  
33  
34  
35  
36  
37  
38  
39  
40  
41  
42  
43  
44  
45  
46  
47  
48  
49  
50  
51  
52  
53  
54  
55  
56  
57  
58  
59  
60

## BMJ Open Study protocols

Effect of home-based high-intensity interval training and behavioral modification using information and communication technology on cardiorespiratory fitness and exercise habits among sedentary breast cancer survivors: the habit-B study protocol for a randomized controlled trial

Katsunori Tsuji<sup>1\*</sup>, Eisuke Ochi<sup>1, 2\*</sup>, Ryo Okubo<sup>1</sup>, Yoichi Shimizu<sup>1</sup>, Aya Kuchiba<sup>3,4</sup>, Taro Ueno<sup>5</sup>, Taichi Shimazu<sup>6</sup>, Takayuki Kinoshita<sup>7</sup>, Naomi Sakurai<sup>8</sup>, Yutaka J. Matsuoka<sup>1</sup>

1. Division of Health Care Research, Center for Public Health Sciences, National Cancer Center Japan, Tokyo, Japan
2. Faculty of Bioscience and Applied Chemistry, Hosei University, Tokyo, Japan
3. Division of Biostatistical Research, Center for Public Health Sciences, National Cancer Center Japan, Tokyo, Japan
4. Biostatistics Division, Center for Research Administration and Support, National Cancer Center Japan, Tokyo, Japan
5. SUSMED, Inc., Tokyo, Japan
6. Division of Prevention, Center for Public Health Sciences, National Cancer Center Japan, Tokyo, Japan
7. Department of Breast Surgery, National Cancer Center Hospital, Tokyo, Japan
8. Cancer Solutions, Tokyo, Japan

\* These two authors contributed equally to this work

Corresponding author

Yutaka J. Matsuoka, MD, PhD

Division of Health Care Research, Center for Public Health Sciences, National



1  
2  
3  
4  
5  
6  
7  
8  
9  
10  
11  
12  
13  
14  
15  
16  
17  
18  
19  
20  
21  
22  
23  
24  
25  
26  
27  
28  
29  
30  
31  
32  
33  
34  
35  
36  
37  
38  
39  
40  
41  
42  
43  
44  
45  
46  
47  
48  
49  
50  
51  
52  
53  
54  
55  
56  
57  
58  
59  
60

Cancer Center Japan, Tokyo, Japan

E-mail address: yumatsuo@ncc.go.jp, Phone: +81-3-3547-5201 ext. 3382

For peer review only

## ABSTRACT

### Introduction

Maintaining high levels of physical activity not only helps to maintain and improve physical health and quality of life, but also plays a role in reducing adverse effects due to cancer treatments. Moreover, a greater degree of cardiorespiratory fitness is associated with reduced risk of all-cause mortality. However, there are no home-based programs for improving cardiorespiratory fitness using body weight exercises for breast cancer survivors. This study will assess the efficacy of the newly developed habit-B program on maximum oxygen uptake compared with treatment as usual. The effects of this program on exercise habits, level of physical activity, physical fitness, and subjective indices will also be investigated.

### Methods and analysis

This is a 12-week, parallel-group, single blind, randomized controlled trial. Allocation will be managed by a central server using a computer-generated random allocation sequence provided by an independent data center. Participants will be assigned to the habit-B Program (high-intensity interval training exercise, exercise counseling + guidance, home-based exercise support using information and communication technology, and a wearable device) or treatment as usual with a wearable device. Subjects will be sedentary women aged 20 to 59 years who have received breast surgery in the past 2 to 13 months after diagnosis of invasive breast cancer (Stage I-IIa) and have never received chemo-therapy except for

1  
2  
3  
4  
5  
6 hormone therapy. The primary endpoint is the change in peak oxygen uptake  
7  
8 ( $VO_{2peak}$ ; mL/kg/min) between the groups after 12 weeks of intervention.  
9

### 10 **Ethics and dissemination**

11  
12  
13 The study protocol was approved by the Institutional Review Board of the National  
14  
15  
16 Cancer Center Japan on 28 February 2019 (ID: 2018-347). The findings will be  
17  
18  
19 disseminated through peer reviewed publications and conference presentations.  
20

21  
22  
23 **Trial status** Study enrolment, intervention, and data collection are ongoing. The  
24  
25  
26 estimated end date for this study is on March 31, 2021.  
27

28  
29 **Trial registration number** UMIN000036400; Pre-results.  
30

### 31 **Strengths and limitations of this study**

- 32  
33  
34  
35  
36  
37  
38  
39  
40  
41  
42  
43  
44  
45  
46  
47  
48  
49  
50  
51  
52  
53  
54  
55  
56  
57  
58  
59  
60
1. This clinical trial will be the world's first home-based HIIT program using ICT to increase cardiorespiratory fitness in sedentary breast cancer survivors.
  2. The habit-B program is designed based on the theory of Bandura for sedentary breast cancer survivors to develop exercise habits.
  3. Collaborative work with professionals in the field of clinical oncology, exercise science, mental health, rehabilitation, public health, nursing, and cancer survivors constitutes a new model for cancer survivorship care.
  4. We cannot rigorously exclude breast cancer survivors who may have exercise habits because the definition of sedentary subjects will be based on self-report.

## **INTRODUCTION**

1  
2  
3  
4  
5  
6 Breast cancer, which is one of the most common cancers affecting women,  
7  
8 newly affects over 86,000 women each year<sup>1</sup>. It is recommended that cancer  
9  
10 survivors acquire and maintain healthy behaviors to extend survival, such as  
11  
12 staying reasonably fit through appropriate physical exercise and having a healthy  
13  
14 diet <sup>2</sup>. High levels of physical activity not only help to maintain and improve  
15  
16 physical health and quality of life (QOL), but also play a role in reducing short- and  
17  
18 long-term side effects of cancer treatment. The American Cancer Society guidelines  
19  
20 recommend a minimum of 150 min moderate physical activity or 75 min intensive  
21  
22 physical activity per week, in addition to usual physical activity in daily life<sup>3</sup>, and  
23  
24 the Japan Breast Cancer Society's Clinical Guidelines for Breast Cancer strongly  
25  
26 recommend maintaining a high level of physical activity<sup>4 5</sup>.

27  
28  
29  
30  
31  
32  
33 The ENERGY Trial, an early and representative study conducted in the US,  
34  
35 demonstrated the effectiveness of a home exercise program and nutritional advice  
36  
37 to promote weight loss among breast cancer survivors<sup>6</sup>. However, because the  
38  
39 proportion of overweight adults in Japan is lower than that in the US<sup>7</sup>, it is not  
40  
41 appropriate to adopt the US-developed program in Japan. It would appear suitable  
42  
43 though to develop intervention around measurements of  $VO_{2peak}$ , the globally  
44  
45 important health indicator of cardiorespiratory fitness <sup>8 9</sup>.

46  
47  
48  
49  
50  
51  $VO_{2peak}$  decreases with age, and a meta-analysis has suggested that women  
52  
53 who are sedentary have a decrease of 3.2 mL/kg/min over 10 years<sup>10</sup>. A cohort  
54  
55 study suggested that the all-cause mortality rate decreased by 17% for each 1  
56  
57 metabolic equivalent (MET) increase (3.5 mL/kg/min) in  $VO_{2peak}$  for women<sup>11</sup>. A  
58  
59  
60

1  
2  
3  
4  
5  
6 systematic review demonstrated that the median  $VO_{2peak}$  of breast cancer  
7  
8 survivors not receiving chemotherapy was lower than that of healthy sedentary  
9  
10 women (25.3 mL/kg/min vs. 29.7 mL/kg/min)<sup>12</sup>. In a 16-year follow-up study of  
11  
12 breast cancer survivors<sup>12</sup>, hazard ratios were 0.67 for the moderate  $VO_{2peak}$  group  
13  
14 (8.5 METs) and 0.45 for the high group (11.1 METs) compared with the low  $VO_{2peak}$   
15  
16 group (6.7 METs). In this report, the mortality rate was reduced by maintaining a  
17  
18  $VO_{2peak}$  of 8 METs or above<sup>12</sup>. Against this background, it is necessary to develop an  
19  
20 exercise program that will increase  $VO_{2peak}$  in breast cancer survivors.  
21  
22  
23  
24  
25

26 When considering how to increase  $VO_{2peak}$ , research has advanced in recent  
27  
28 years with the use of HIIT for athletes and sedentary populations<sup>13-15</sup>. HIIT allows  
29  
30 subjects to exercise at vigorous intensity within 10 min, resulting in improved  
31  
32 cardiorespiratory fitness<sup>9 16</sup>. A recent systematic review showed, based on the  
33  
34 findings of 12 studies of HIIT conducted in supervised experimental settings, that  
35  
36 HIIT appeared to be more beneficial than treatment as usual for improving  
37  
38 physical fitness and health-related outcomes in cancer survivors during any stage  
39  
40 of treatment and aftercare<sup>16</sup>. To our knowledge, only one study has evaluated  
41  
42 changes in cardiorespiratory fitness following a home-based HIIT program, which  
43  
44 involved healthy young women<sup>17</sup>. Given that no home-based HIIT programs with  
45  
46 body weight exercises have been reported for breast cancer survivors to date, it is  
47  
48 necessary to develop such programs and examine their efficacy and feasibility.  
49  
50  
51  
52  
53  
54

55 Recent emerging technologies such as smartphone applications (apps) and  
56  
57 wearable devices are promising tools for the monitoring of cancer patients' daily  
58  
59  
60

1  
2  
3  
4  
5  
6 activity levels and for facilitating coaching, self-monitoring, feedback, and  
7  
8 encouragement to exercise<sup>18,19</sup>. Apps<sup>20</sup> and wearable devices<sup>21</sup> are being used for  
9  
10 both subjective and objective measures in the field of clinical oncology. However,  
11  
12 further investigations are needed of their potential utility in objective evaluations  
13  
14 of physical activity as well as in lifestyle modification and maintenance and  
15  
16 enhancement of QOL in real-world settings.  
17  
18  
19

20  
21 The aim of this study is to investigate the effect of the newly developed  
22  
23 habit-B program, comprising **h**ome-based high-intensity interval training **a**nd  
24  
25 **b**ehavioral modification using **i**nformation and communication **t**echnology on  
26  
27 cardiorespiratory fitness and exercise habits for sedentary **b**reast cancer  
28  
29 survivors. We will investigate whether the habit-B program improves  $VO_{2peak}$   
30  
31 compared with a control group as well as investigate the safety and feasibility of  
32  
33 program. The secondary objectives are to investigate the effect of this program on  
34  
35 exercise habits, physical activity level, physical function, and subjective measures.  
36  
37  
38  
39  
40  
41  
42  
43  
44  
45  
46  
47  
48  
49  
50  
51  
52  
53  
54  
55  
56  
57  
58  
59  
60

## METHODS AND ANALYSIS

### Trial design

In this study 12-week, parallel-group, single blind, randomized controlled trial (Figure 1), participants will be randomly assigned to intervention either with the habit-B program (HIIT exercise, exercise counseling + guidance, home-based exercise support using ICT, and a wearable device) or treatment as usual with a wearable device (Fitbit Versa smart watch; Fitbit Inc., San Francisco, CA). An independent data center will provide computer-generated random allocation. Participants will be assigned by the minimization method, a form of dynamic randomization, using two prognostic factors:  $VO_{2peak}$  and age. Based on the allocation sequences, the contents of the app that participants use during the trial will be assigned automatically to either the habit-B program or control.

### Participants

The eligibility criteria for participants are as follows: (1) female, aged between 20 and 59 years at diagnosis (stages I-IIa); (2) diagnosed with invasive breast cancer within 2 to 13 months after surgery; (3) not requiring cancer chemotherapy aside from hormone therapy; (4) currently engages in not more than moderate intensity exercise for 30 min on 2 separate days per week (total of 60 min), which is based on the National Health and Nutrition Survey Japan<sup>22</sup>; (5) ability to complete an electronic patient reported outcome (e-PRO) questionnaire via a smartphone; (6) consent to trial participation obtained in writing from the

1  
2  
3  
4  
5  
6 patient themselves; and (7) ability to read, write, and understand Japanese. The  
7  
8 exclusion criteria are as follows: (1) judged to have severely reduced cognitive  
9  
10 function by a primary physician; (2) exercise judged to be risky by a primary  
11  
12 physician; (3) history of smoking within the previous 12 months; (4) body mass  
13  
14 index of 30 or above; (5) abnormal electrocardiogram in preoperative testing,  
15  
16 resting heart rate (HR) below 60 beats/min or above 100 beats/min, or stage III  
17  
18 hypertension or above (diastolic blood pressure over 110 mmHg or systolic blood  
19  
20 pressure over 180 mmHg); and (6) judged unfit for the trial by a primary physician  
21  
22 for other reasons.  
23  
24  
25  
26  
27  
28  
29  
30

### 31 **Interventions**

32  
33 This will be a randomized, single-blind study. Participants will be  
34  
35 enrolled and assigned using an electronic data capture system with an app. The  
36  
37 protocol intervention will be started within 21 days of enrollment. If for some  
38  
39 reason the start is delayed beyond 21 days, the reason will be entered into the  
40  
41 electronic Case Report Form (eCRF). If it is determined that the intervention  
42  
43 cannot be started, the details will be noted in the eCRF as “protocol intervention  
44  
45 stopped.”  
46  
47  
48  
49  
50  
51

#### 52 53 The habit-B program group

54  
55 The habit-B program (Figure 2) comprises home-based exercise support  
56  
57 utilizing 6 weeks of exercise counseling/exercise guidance (once per week, 6 times  
58  
59  
60



1  
2  
3  
4  
5  
6 total, 30 min per session) and 12 weeks of ICT interventions, which are provided  
7  
8 with personalized e-mail (once per week, 12 times in total), and a newly developed  
9  
10 exercise app (during each exercise session, shown in Figure 3). Participants will be  
11  
12 encouraged to complete the following program HIIT using specific body weight  
13  
14 exercises for one 10-min training session 3 times a week for 12 weeks (total of 36  
15  
16 sessions during the trial period, as shown in Figures 2 and 4): (1) one bout of 10-  
17  
18 min exercises; (2) a total of 10 min exercise, comprising a 3-min warm-up, 4-min  
19  
20 training (8 sets of 20 s exercise + 10 s rest), and a 3-min cool-down; (3) these  
21  
22 training exercises are designed to increase in intensity each week; and (4) the  
23  
24 details of these exercises are divided into three stages according to  
25  
26 cardiorespiratory fitness ( $VO_{2peak}$ ) at Week 0 and the contents of training are  
27  
28 designed to increase physical strength incrementally in accordance with the  
29  
30 individual's level of strength. In addition, we will continue to follow up on the  
31  
32 between-group differences in e-PRO data of change from baseline to 24 and 36  
33  
34 weeks post-intervention.  
35  
36  
37  
38  
39  
40  
41  
42  
43

44 The social cognitive theory proposed by Bandura et al. may be helpful to  
45  
46 apply when considering interventions for behavioral change<sup>23</sup>, chiefly in that it  
47  
48 affords a framework for understanding the underlying reasons for making and  
49  
50 maintaining health behaviors<sup>24</sup>. Its key concepts involve (1) understanding of health  
51  
52 risks and benefits, (2) perceived self-efficacy of being able to control one's own  
53  
54 health habits, (3) projected costs and benefits or expected outcomes, (4) specified  
55  
56 health goals with short- and long-term intentions to engage in the behavior, (5)  
57  
58  
59  
60

1  
2  
3  
4  
5  
6 perceived facilitators and social support, and (6) barriers to instituting change<sup>23 24</sup>.

7  
8 In the present study, we developed the exercise program applying the first 5  
9  
10 concepts.

11  
12  
13 We will also provide the participant a brochure as a reminder to exercise and  
14  
15 will check the type of physical activity they engage in in daily life (Figure 5). When  
16  
17 developing the habit-B program, we collaborated closely with exercise scientists,  
18  
19 oncologists, physical therapists, nurses, mental health practitioners, and breast  
20  
21 cancer survivors.  
22  
23  
24  
25  
26  
27

## 28 Control group

29  
30 The control group will be provided a wearable device and setup support  
31  
32 at the start of intervention. Self-monitoring using the wearable device will be  
33  
34 recommended during the trial period. While there are no reports of increasing  
35  
36  $VO_{2peak}$  with the use of a wearable device alone, other reports have ruled out their  
37  
38 efficacy with regard to effects on exercise habits<sup>25</sup>. In this study, the wearable  
39  
40 devices are used only to monitor physical activity in the control group.  
41  
42  
43  
44  
45  
46  
47

## 48 PROCEDURE

### 49 Data collection, management, monitoring, and auditing

50  
51 We will collect all data except qualitative interview data, blood samples,  
52  
53 fecal samples, and medical economic costs through the e-PRO system. Those who  
54  
55 provide consent will be enrolled in the app-based e-PRO system on their  
56  
57  
58  
59  
60

1  
2  
3  
4  
5  
6 smartphone. If the entered data is insufficient, enrollment will not be accepted  
7  
8 until all fields are completed at baseline. The electronic data capture system will be  
9  
10 used for data management and central monitoring. Because this exercise program  
11  
12 will not be invasive, there is no need to establish a data monitoring committee or  
13  
14 to complete auditing in this study.  
15  
16  
17  
18  
19  
20

### 21 **Random assignment and assignment adjustment factors**

22  
23 After enrollment and the additional input of the  $VO_{2peak}$  value, patients  
24  
25 will be randomly assigned. In the process of random assignment,  $VO_{2peak}$  (obtained  
26  
27 from the baseline measurement performed after obtaining informed consent) and  
28  
29 age will be used as assignment adjustment factors, and automatic assignment will  
30  
31 be performed using the data center's assignment feature. Only the measurer will  
32  
33 be blinded in this study, because interventions differ for the intervention group  
34  
35 and control group.  
36  
37  
38  
39  
40  
41  
42  
43

### 44 **Dataset availability**

45  
46 The data sharing policy in this study is defined with reference to the  
47  
48 example proposed by the International Committee of Medical Journal Editors  
49  
50 (ICMJE): Individual participant data will be made publicly available for a 5-year  
51  
52 period through the University Hospital Medical Information Network – Individual  
53  
54 Case Data Repository (UMIN-ICDR) (<https://www.umin.ac.jp/icdr/index-j.html>).  
55  
56  
57  
58  
59  
60

### **Concomitant treatments**

There are no regulated concomitant therapies or supportive therapies in this study.

### **Stopping rules for participants**

Situations in which the intervention protocol is terminated for any of the following reasons will be defined as stopping of the protocol intervention: (1) dropping out due to withdrawal of consent or inability to measure the primary endpoint ( $VO_{2peak}$ ); (2) if a primary physician deems it necessary to stop the protocol intervention for a participant due to adverse events such as stress; (3) death of the patient during the protocol intervention period; (4) sudden worsening of the participant's condition after enrollment or discovery of a protocol violation or ineligibility. A researcher will report the reason for stopping the protocol intervention to the data center. In this event, as long as consent is not withdrawn, follow-up including the questionnaire survey will be continued.

### **Stopping of the assessment**

Situations in which the participant declines assessment will effectively stop the assessment. A researcher will confirm the possibility of implementing the remaining parts of the intervention and follow-up with the participant. Stopping of the assessment will be recorded along with the details of the reason for stopping.

1  
2  
3  
4  
5  
6 As a rule, the remaining aspect of follow-up will be implemented as stipulated per  
7  
8 protocol.  
9

## 10 11 12 13 **Assessment measures**

14  
15  
16 Table 1 shows the outcome measurement schedule.  
17

18  
19  
20  
21 Primary outcome measure: Cardiorespiratory fitness ( $VO_{2peak}$ )  
22

23  
24  $VO_{2peak}$  is the maximum oxygen uptake observed during exercise  
25  
26 tolerance testing and is used as an indicator of cardiorespiratory fitness<sup>26 27</sup>. For  
27  
28 each participant,  $VO_{2peak}$  will be measured using the incremental multistage load  
29  
30 method with a bicycle ergometer (Ergomedic 828E, Monark, Stockholm, Sweden)  
31  
32 at 60 revolutions per min (rpm). The test will begin at 0.5 kp and increase by 0.25  
33  
34 kp per min until exhaustion. When the participant's pedal rotation speed drops  
35  
36 below 55 rpm 3 times, the test will be deemed concluded. Respiratory gases will be  
37  
38 analyzed using an automatic gas analyzer (Air Monitor AE-310S, Minato Medical  
39  
40 Science Co., Ltd., Osaka, Japan). Rated perceived exertion and HR will be recorded  
41  
42 after 45 s in each stage. The maximum value of  $VO_2$  observed during exercise will  
43  
44 be used as the  $VO_{2peak}$ .  
45  
46  
47  
48  
49  
50  
51  
52

53 Secondary outcome measures

54  
55  
56 *Physical function*  
57  
58  
59  
60

1  
2  
3  
4  
5  
6 An alternative indicator of  $VO_{2peak}$  the 6-min walk test (m), will be  
7  
8 performed<sup>28</sup>. Walking speed (m/s), a diagnostic criterion for sarcopenia, will also  
9  
10 be measured. A 5-m section in the middle of an 11-m line will be measured to  
11  
12 calculate walking speed<sup>29</sup>. One-repetition maximum for leg press, which reflects  
13  
14 muscle strength in the lower body, will be assessed using a leg press machine  
15  
16 (Powertec Leg Press P-LP16; Powertec, Paramount, CA)<sup>30 31</sup>. After a thorough  
17  
18 warm-up, measurements will be performed by incrementally increasing the load  
19  
20 until a weight, which can be lifted only once, is reached. Load will be increased by  
21  
22 two levels at a time. Grip strength (TKK 5401 Grip-D; Takei, Niigata, Japan) will  
23  
24 also be measured<sup>31 32</sup>. The chair stand test, which reflects combined leg strength  
25  
26 for the lower limbs as a whole, will be performed<sup>31 33</sup>. Participants will sit and  
27  
28 stand from a chair for 10 s and the number of chair stands will be measured. The  
29  
30 timed up and go test, which is used in clinical settings as an assessment of  
31  
32 functionality as well as muscular strength, will also be performed<sup>31</sup>. The functional  
33  
34 reach test, which as a method of assessing dynamic balance is considered an  
35  
36 indicator of expected fall risk, will also be performed<sup>34</sup>. While keeping the hand at  
37  
38 the same height, the participant will extend their arm forward as far as possible,  
39  
40 without moving the feet, to make a mark at the farthest point they can reach.  
41  
42 Lifting the heels and standing on tiptoe is allowed. The two-step test will also be  
43  
44 performed<sup>35</sup>. This test comprehensively assesses ability to walk, including leg  
45  
46 strength, balance, and flexibility. Based on bioelectrical impedance analysis, a body  
47  
48  
49  
50  
51  
52  
53  
54  
55  
56  
57  
58  
59  
60

1  
2  
3  
4  
5  
6 composition meter (MC-780A-N, TANITA, Japan) will be used to send a weak  
7  
8 electrical current through the body via electrodes.  
9

### 10 11 12 13 *Physical activity level*

14  
15  
16 The Global Physical Activity Questionnaire (GPAQ) was developed in  
17  
18 2002 as an internationally standardized questionnaire for surveying physical  
19  
20 activity level. The GPAQ is widely used in policy development by the World Health  
21  
22 Organization<sup>36-38</sup>. The face validity of the Japanese version has been confirmed<sup>39</sup>.  
23  
24 In addition, as an objective measure of physical activity during the research period,  
25  
26 resting HR, steps, distance, calorie expenditure, and the duration of each sleep  
27  
28 stage as well as wake up time will be measured using an activity monitor and  
29  
30 logged for 24-h periods (Fitbit versa, Fitbit Inc., San Francisco, CA). Maximum HR  
31  
32 during exercise will also be measured to confirm whether the intensity of the  
33  
34 exercise being implemented is appropriate. The accurately measured group will be  
35  
36 defined as the group who wears the Fitbit versa at least 60% of the time during the  
37  
38 12-week intervention period.  
39  
40  
41  
42  
43  
44  
45  
46  
47  
48

### 49 *Subjective measures*

50  
51 Fear of cancer recurrence (FCR) will be assessed by the overall fear index  
52  
53 score on the Concerns About Recurrence Scale<sup>40 41</sup>. This instrument comprises 4  
54  
55 items scored on a 6-point Likert scale (range, 1–6), with a higher score indicating  
56  
57 worse FCR. Depression will be assessed using the Patient Health Questionnaire-9  
58  
59  
60

1  
2  
3  
4  
5  
6 42. Fatigue will be assessed by the Cancer Fatigue Scale. Sleep will be assessed by  
7  
8 the Athens Insomnia Scale<sup>43 44</sup>. Health-related QOL will be assessed using the  
9  
10 EuroQol 5 Dimensions questionnaire<sup>45 46</sup>.  
11  
12  
13  
14  
15

### 16 *Biological assessments*

17  
18 To assess changes in gut microbiota, intestinal metabolites, and intestinal  
19 immunity<sup>47</sup>, a 1-g fecal sample will be obtained at baseline and at 12 weeks. Blood  
20  
21 compositions of n-3 polyunsaturated fatty acids<sup>48</sup> will be assessed from capillary  
22  
23 dried blood spot samples (approximately 80  $\mu$ L) at baseline<sup>49</sup>.  
24  
25  
26  
27  
28  
29  
30

### 31 *Medical economic costs*

32  
33 For cost-benefit analysis, the number of staff, working hours, labor costs,  
34  
35 equipment costs, office expenses, number of unexpected medical consultations,  
36  
37 direct medical costs, and costs of other medical services used will be obtained.  
38  
39  
40  
41  
42  
43

### 44 **Harms**

45  
46 The intervention in this research will potentially place stress on  
47  
48 participants physically and in terms of their time, because it will take  
49  
50 approximately 1 h and 30 min. There will also be temporary exhaustion, although  
51  
52 individual differences will be considered in exercise implementation. There are no  
53  
54 financial risks associated with participation in the study.  
55  
56  
57  
58  
59  
60



## Compensation

If participants develop unexpected health issues due to study participation during or after completion of the study, treatment will be provided appropriately in the same way as standard medical care. Medical expenses at that time will be handled within the medical insurance to which the participant is enrolled. No financial compensation, except for providing the wearable device, will be given in this study.

## DATA ANALYSIS

The primary endpoint,  $VO_{2peak}$ , will be calculated as follows. Measurements will be taken at the start of the intervention (0 week) and at the conclusion of the intervention (12 weeks). The analysis set for primary analyses will consist of all randomized subjects. Our primary analysis is intention-to-treat analysis and patients without outcome data will be excluded from the analyses. After completing primary endpoint data locking, analyses centering on the primary endpoint will be performed. The objective of primary analysis in this study is to investigate whether the habit-B program group (trial treatment group) surpasses the group receiving treatment as usual (control) in  $VO_{2peak}$ , the primary endpoint. One-sided tests will be used, because, if the trial intervention group is inferior to the control group, it is not important in this trial whether that difference is statistically significant. The trial will adopt a one-sided significance level of 2.5%. A between-groups comparison will be performed using an independent two-sample

1  
2  
3  
4  
5  
6 t-test to determine the significance of amount of change in  $VO_{2peak}$  (mL/kg/min)  
7  
8 from 0 week to 12 weeks (after intervention completion) between the trial  
9  
10 intervention and the control groups. Secondary endpoint analyses will be  
11  
12 performed with the goal of supplementing the primary analyses. The detailed  
13  
14 methods for supplementary analyses will be specified in the Statistical Analysis  
15  
16 Plan before the study data is fixed. Once all data has been locked following  
17  
18 conclusion of the primary analysis period and follow-up, final analyses will be  
19  
20 performed.  
21  
22  
23  
24  
25  
26  
27  
28

### 29 **Sample size estimation**

30  
31 The main hypothesis of this study is that the intervention group will  
32  
33 significantly surpass the control group in terms of the amount of change in  $VO_{2peak}$   
34  
35 from 0 week to 12 weeks. Regarding the clinical significance of the results of an  
36  
37 exercise program, it is common to use an increase of 10% in  $VO_{2peak}$  to evaluate the  
38  
39 effects of an exercise program<sup>50</sup>. As such, an increase of 10% from  $VO_{2peak}$  at the  
40  
41 start of exercise has been established for this trial. According to a previous study of  
42  
43 intervention similar to that in the present study<sup>51</sup>, the standard deviation for the  
44  
45  $VO_{2peak}$  of the intervention group was 2.6 mL/kg/min. Based on the above  
46  
47 hypothesis, by estimating the number of subjects required for a one-sided 2.5%  
48  
49 and a power of 80% in the analysis, 28 individuals per group are necessary for a  
50  
51 total of 56 in both groups (SAS 9.4 software; SAS Institute Inc., Cary, NC). With the  
52  
53 estimation that 4 participants will drop out, enrollment of 60 patients is planned.  
54  
55  
56  
57  
58  
59  
60

## Study period

The study period of this trial will be from April 2019 to March 2021; the participant entry period will be from April 2019 to March 2020. Study enrolment, intervention, and data collection are ongoing.

## PATIENT AND PUBLIC INVOLVEMENT STATEMENT

This study protocol was designed with the involvement of a breast cancer survivor who participated in this study as a researcher and coauthor. She discussed issues with other survivors in instances where survivors' preferences and opinions should be considered. In the process of creating the habit-B program, we conducted a preliminary confirmation of the feasibility and safety of this program in 5 breast cancer survivors.

## ETHICAL CONSIDERATIONS AND DISSEMINATION

The protocol was approved by the Institutional Review Board of the National Cancer Center Research Ethical Review Committee on 28 February 2019 (ID: 2018-274). The results obtained will be submitted for publication in a peer-reviewed international journal, and the main relevant findings will be presented at conferences.

## DISCUSSION

An excellent review by Shapiro et al. affirms the positive role that high levels of physical activity play in improving not only health-related QOL and symptom management (e.g., chronic pain, fatigue, insomnia, sexual dysfunction, metabolic syndrome, bone loss, cognitive dysfunction, and depression), but also return to work in cancer survivors<sup>52</sup>. In addition, increased cardiorespiratory fitness may decrease all-cause mortality among cancer survivors<sup>53,54</sup>. However, there are currently no effective home-based exercise programs available for improving cardiorespiratory fitness for breast cancer survivors. No studies have precisely investigated cardiorespiratory fitness<sup>55</sup>; however, a small pilot study did estimate  $VO_2$  based on subjective exercise intensity among Japanese breast cancer survivors. Accordingly, the present study seeks to confirm whether our originally developed home-based exercise program (habit-B program) improves  $VO_{2peak}$  compared with treatment as usual in sedentary breast cancer survivors in Japan. With the assumption that the program will be widely implemented if successful, it was designed to be (1) home based, (2) quick to implement (only 10 min in total), (3) use only body weight exercises involving the lower limbs, and (4) utilize a wearable device for which personalized ICT support is available. We believe that no similar studies have been implemented.

If it is found that the habit-B program is effective in increasing  $VO_{2peak}$ , we will then proceed to the next trial, aiming for its widespread implementation in society. Specifically, the aims of the next study will be (1) to investigate whether

1  
2  
3  
4  
5  
6 intervention using the program developed in this research but presented in a  
7  
8 simpler format is effective in establishing exercise habits and (2) to assess whether  
9  
10 the program can be implemented in societies in Eastern Asia, including in both  
11  
12 urban and rural Japan and other East Asian countries.  
13  
14

15  
16 We strongly believe that a successful support team comprising specialists in  
17  
18 the field of exercise science, medicine, rehabilitation, nursing, and patient  
19  
20 advocacy, as involved in this study, will provide a new horizon in cancer  
21  
22 survivorship care.  
23  
24  
25  
26  
27  
28  
29  
30  
31  
32  
33  
34  
35  
36  
37  
38  
39  
40  
41  
42  
43  
44  
45  
46  
47  
48  
49  
50  
51  
52  
53  
54  
55  
56  
57  
58  
59  
60

## Acknowledgements

We sincerely thank Dr. Hiroji Iwata, Dr. Hirokazu Arai, Ms. Noriko Watanabe, Dr. Noriaki Tatematsu, Dr. Hikaru Ihira, Mr. Tomoyasu Chigahara, Dr. Taro Ueno, Dr. Shinji Fukuda, and Dr. Eiko Saito for their generous support for the study. We also thank Ms. Ayako Sato for her role as an exercise model.

**Contributors** KT, EO, RO, YS, TK, and YM conceived the study and drafted the original protocol. KT, EO, RO, YS, TS, AK, TU, TK, and YM participated in refining the protocol. TU developed app and EDC system and managed datacenter. AK played a major role in the statistical analysis. KT, EO, TK, and NS contributed to developing the exercise program. KT, EO and YM drafted the manuscript. All authors participated in, read, and approved the final manuscript.

**Funding** This study is supported by a National Cancer Center Research and Development Fund (30-A-17).

**Competing interests** EO has received research support from Nippon Suisan Kaisha, Ltd. YJM has received speaker fees from Pfizer, Mochida, Eli Lilly, Morinaga Milk, and NTT Data and is conducting collaborative research with Morinaga Milk. AK has received speaking fees from Chugai Pharmaceutical Co., Ltd. All other authors declare that they have no competing interests regarding this work.

**Ethics approval.** The protocol was approved by the Institutional Review Board of the National Cancer Center on 28 February 2019 (ID: 2018-347).

## FIGURE LEGENDS

Figure 1. Flow diagram of study participants. HIIT, high-intensity interval training; ICT, information and communication technology.

Figure 2. Study design of the habit-b program (**h**ome-based high-intensity interval training **and** **b**ehavioral modification using **i**nformation and communication **t**echnology on cardiorespiratory fitness and exercise habits for sedentary **b**reast cancer survivors). HIIT, high-intensity interval training; ICT, information and communication technology.

Figure 3. Screenshots of the application for the smartphone-based exercise movie.

Figure 4. Sample of high-intensity interval training using body weight exercise.

Figure 5. Brochure reminding participants about the importance of exercise and providing instructions about physical activity in daily life.

## References

1. Denlinger CS, Sanft T, Baker KS, et al. Survivorship, Version 2.2017, NCCN Clinical Practice Guidelines in Oncology. *J Natl Compr Canc Netw* 2017;15(9):1140–63. doi: 10.6004/jnccn.2017.0146 [published Online First: 2017/09/07]
2. Public survey about cancer control in Japan. (*the Cabinet Office*), <https://survey.gov-online.go.jp/h26/h26-gantaisaku/5.html> (accessed on 2018/Aug./10)
3. Denlinger CS, Carlson RW, Are M, et al. Survivorship: Introduction and Definition: Clinical Practice Guidelines in Oncology. *Journal of the National Comprehensive Cancer Network : JNCCN* 2014;12(1):34–45.
4. Rock CL, Doyle C, Demark-Wahnefried W, et al. Nutrition and physical activity guidelines for cancer survivors. *CA: A Cancer Journal for Clinicians* 2012;62(4):242–74. doi: 10.3322/caac.21142
5. Hori M MT, Shibata A, Katanoda K, Sobue T, Nishimoto H, et al. Cancer incidence and incidence rates in Japan in 2009: a study of 32 population-based cancer registries for the Monitoring of Cancer Incidence in Japan (MCIJ) project. *Japanese journal of clinical oncology* 2015;45(9):884–91.
6. Rock CL, Flatt SW, Byers TE, et al. Results of the Exercise and Nutrition to Enhance Recovery and Good Health for You (ENERGY) Trial: A Behavioral Weight Loss Intervention in Overweight or Obese Breast Cancer Survivors. *J Clin Oncol* 2015;33(28):3169–76. doi: 10.1200/JCO.2015.61.1095 [published Online First: 2015/08/19]
7. Kuwabara M, Kuwabara R, Niwa K, et al. Different Risk for Hypertension, Diabetes, Dyslipidemia, and Hyperuricemia According to Level of Body Mass Index in Japanese and American Subjects. *Nutrients* 2018;10(8) doi: 10.3390/nu10081011 [published Online First: 2018/08/08]
8. Rogers LQ, Courneya KS, Anton PM, et al. Effects of the BEAT Cancer physical activity behavior change intervention on physical activity, aerobic fitness, and quality of life in breast cancer survivors: a multicenter randomized controlled



- 1  
2  
3  
4  
5  
6 trial. *Breast Cancer Res Treat* 2015;149(1):109–19. doi: 10.1007/s10549-014-  
7 3216-z [published Online First: 2014/11/25]  
8
- 9 9. Dolan LB, Campbell K, Gelmon K, et al. Interval versus continuous aerobic  
10 exercise training in breast cancer survivors—a pilot RCT. *Support Care*  
11 *Cancer* 2016;24(1):119–27. doi: 10.1007/s00520-015-2749-y [published  
12 Online First: 2015/05/10]  
13  
14  
15
- 16 10. Tanaka H, Desouza CA, Jones PP, et al. Greater rate of decline in maximal  
17 aerobic capacity with age in physically active vs. sedentary healthy women.  
18 *Journal of applied physiology (Bethesda, Md : 1985)* 1997;83(6):1947–53. doi:  
19 10.1152/jappl.1997.83.6.1947 [published Online First: 1998/02/14]  
20  
21  
22
- 23 11. Gulati M, Pandey DK, Arnsdorf MF, et al. Exercise capacity and the risk of death  
24 in women: the St James Women Take Heart Project. *Circulation*  
25 2003;108(13):1554–9. doi: 10.1161/01.Cir.0000091080.57509.E9 [published  
26 Online First: 2003/09/17]  
27  
28
- 29 12. Peel AB, Thomas SM, Dittus K, et al. Cardiorespiratory fitness in breast cancer  
30 patients: a call for normative values. *Journal of the American Heart*  
31 *Association* 2014;3(1):e000432. doi: 10.1161/jaha.113.000432 [published  
32 Online First: 2014/01/15]  
33  
34  
35
- 36 13. Tabata I, Nishimura K, Kouzaki M, et al. Effects of moderate-intensity endurance  
37 and high-intensity intermittent training on anaerobic capacity and VO2max.  
38 *Med Sci Sports Exerc* 1996;28(10):1327–30. [published Online First:  
39 1996/10/01]  
40  
41  
42
- 43 14. Batacan RB, Jr., Duncan MJ, Dalbo VJ, et al. Effects of high-intensity interval  
44 training on cardiometabolic health: a systematic review and meta-analysis of  
45 intervention studies. *British journal of sports medicine* 2017;51(6):494–503.  
46 doi: 10.1136/bjsports-2015-095841 [published Online First: 2016/11/01]  
47  
48
- 49 15. Mallol M, Bentley DJ, Norton L, et al. Comparison of Reduced-Volume High-  
50 Intensity Interval Training and High-Volume Training on Endurance  
51 Performance in Triathletes. *International journal of sports physiology and*  
52 *performance* 2019;14(2):239–45. doi: 10.1123/ijsp.2018-0359 [published  
53 Online First: 2018/08/07]  
54  
55  
56  
57  
58  
59  
60

16. Mugele H, Freitag N, Wilhelmi J, et al. High-intensity interval training in the therapy and aftercare of cancer patients: a systematic review with meta-analysis. *J Cancer Surviv* 2019 doi: 10.1007/s11764-019-00743-3 [published Online First: 2019/02/27]
17. McRae G, Payne A, Zelt JG, et al. Extremely low volume, whole-body aerobic-resistance training improves aerobic fitness and muscular endurance in females. *Applied physiology, nutrition, and metabolism = Physiologie appliquee, nutrition et metabolisme* 2012;37(6):1124-31. doi: 10.1139/h2012-093 [published Online First: 2012/09/22]
18. Gresham G, Hendifar AE, Spiegel B, et al. Wearable activity monitors to assess performance status and predict clinical outcomes in advanced cancer patients. *npj Digital Medicine* 2018;1(1):27. doi: 10.1038/s41746-018-0032-6
19. Piercy KL, Troiano RP, Ballard RM, et al. The Physical Activity Guidelines for Americans Physical Activity Guidelines for Americans Physical Activity Guidelines for Americans. *JAMA* 2018;320(19):2020-28. doi: 10.1001/jama.2018.14854
20. Akechi T, Yamaguchi T, Uchida M, et al. Smartphone problem-solving and behavioural activation therapy to reduce fear of recurrence among patients with breast cancer (SMartphone Intervention to LEssen fear of cancer recurrence: SMILE project): protocol for a randomised controlled trial. *BMJ Open* 2018;8(11):e024794. doi: 10.1136/bmjopen-2018-024794 [published Online First: 2018/11/11]
21. Gresham G, Schrack J, Gresham LM, et al. Wearable activity monitors in oncology trials: Current use of an emerging technology. *Contemp Clin Trials* 2018;64:13-21. doi: 10.1016/j.cct.2017.11.002 [published Online First: 2017/11/14]
22. Ministry of Health, Labour and Welfare Summary of results of the national nutrition survey, Japan. 2017.;<https://www.mhlw.go.jp/toukei/itiran/gaiyo/k-eisei.html> (accessed on 2018/Aug./10 (in Japanese))
23. Bandura A. Health promotion by social cognitive means. *Health education & behavior : the official publication of the Society for Public Health Education*

- 2004;31(2):143–64. doi: 10.1177/1090198104263660 [published Online First: 2004/04/20]
24. Stacey FG, James EL, Chapman K, et al. A systematic review and meta-analysis of social cognitive theory-based physical activity and/or nutrition behavior change interventions for cancer survivors. *J Cancer Surviv* 2015;9(2):305–38. doi: 10.1007/s11764-014-0413-z [published Online First: 2014/11/30]
25. Abedtash H, Holden RJ. Systematic review of the effectiveness of health-related behavioral interventions using portable activity sensing devices (PASDs). *Journal of the American Medical Informatics Association : JAMIA* 2017;24(5):1002–13. doi: 10.1093/jamia/ocx006 [published Online First: 2017/03/25]
26. Taylor HL, Buskirk E, Henschel A. Maximal oxygen intake as an objective measure of cardio-respiratory performance. *Journal of applied physiology* 1955;8(1):73–80. doi: 10.1152/jappl.1955.8.1.73 [published Online First: 1955/07/01]
27. Whipp BJ, Davis JA, Torres F, et al. A test to determine parameters of aerobic function during exercise. *Journal of applied physiology: respiratory, environmental and exercise physiology* 1981;50(1):217–21. doi: 10.1152/jappl.1981.50.1.217 [published Online First: 1981/01/01]
28. Ross RM, Murthy JN, Wollak ID, et al. The six minute walk test accurately estimates mean peak oxygen uptake. *BMC pulmonary medicine* 2010;10:31. doi: 10.1186/1471-2466-10-31 [published Online First: 2010/05/28]
29. Chen LK, Liu LK, Woo J, et al. Sarcopenia in Asia: consensus report of the Asian Working Group for Sarcopenia. *J Am Med Dir Assoc* 2014;15(2):95–101. doi: 10.1016/j.jamda.2013.11.025 [published Online First: 2014/01/28]
30. Schmitz KH, Ahmed RL, Troxel A, et al. Weight lifting in women with breast-cancer-related lymphedema. *The New England journal of medicine* 2009;361(7):664–73. doi: 10.1056/NEJMoa0810118 [published Online First: 2009/08/14]
31. Neil-Sztramko SE, Kirkham AA, Hung SH, et al. Aerobic capacity and upper limb strength are reduced in women diagnosed with breast cancer: a systematic

- 1  
2  
3  
4  
5  
6 review. *Journal of physiotherapy* 2014;60(4):189–200. doi:  
7 10.1016/j.jphys.2014.09.005 [published Online First: 2014/12/03]  
8
- 9 32. Van der Weijden–Van Doornik EM, Slot DE, Burtin C, et al. Grip Strength in  
10 Women Being Treated for Breast Cancer and Receiving Adjuvant Endocrine  
11 Therapy: Systematic Review. *Phys Ther* 2017;97(9):904–14. doi:  
12 10.1093/ptj/pzx069 [published Online First: 2017/10/04]  
13
- 14 33. Herrero F, San Juan AF, Fleck SJ, et al. Combined aerobic and resistance  
15 training in breast cancer survivors: A randomized, controlled pilot trial.  
16 *International journal of sports medicine* 2006;27(7):573–80. doi: 10.1055/s-  
17 2005–865848 [published Online First: 2006/06/28]  
18
- 19 34. Foley MP, Hasson SM. Effects of a Community–Based Multimodal Exercise  
20 Program on Health–Related Physical Fitness and Physical Function in Breast  
21 Cancer Survivors:A Pilot Study. *Integrative Cancer Therapies*  
22 2016;15(4):446–54. doi: 10.1177/1534735416639716  
23
- 24 35. Maruya K, Fujita H, Arai T, et al. Identifying elderly people at risk for cognitive  
25 decline by using the 2–step test. *J Phys Ther Sci* 2018;30(1):145–49. doi:  
26 10.1589/jpts.30.145  
27
- 28 36. Organization WH. Global Physical Activity Surveillance [Available from:  
29 <http://www.who.int/ncds/surveillance/steps/GPAQ/en/> accessed Aug. 10  
30 2018.  
31
- 32 37. Cleland CL, Hunter RF, Kee F, et al. Validity of the global physical activity  
33 questionnaire (GPAQ) in assessing levels and change in moderate–vigorous  
34 physical activity and sedentary behaviour. *BMC Public Health* 2014;14:1255.  
35 doi: 10.1186/1471–2458–14–1255 [published Online First: 2014/12/11]  
36
- 37 38. Chu AH, Ng SH, Koh D, et al. Reliability and Validity of the Self– and Interviewer–  
38 Administered Versions of the Global Physical Activity Questionnaire (GPAQ).  
39 *PLoS One* 2015;10(9):e0136944. doi: 10.1371/journal.pone.0136944 [published  
40 Online First: 2015/09/04]  
41
- 42 39. Bull FC, Maslin TS, Armstrong T. Global physical activity questionnaire (GPAQ):  
43 nine country reliability and validity study. *Journal of physical activity & health*  
44 2009;6(6):790–804. [published Online First: 2010/01/28]  
45  
46  
47  
48  
49  
50  
51  
52  
53  
54  
55  
56  
57  
58  
59  
60

- 1  
2  
3  
4  
5  
6 40. Vickberg SM. The Concerns About Recurrence Scale (CARS): a systematic  
7 measure of women's fears about the possibility of breast cancer recurrence.  
8 *Ann Behav Med* 2003;25(1):16–24.  
9
- 10 41. Momino K, Akechi T, Yamashita T, et al. Psychometric Properties of the  
11 Japanese Version of the Concerns About Recurrence Scale (CARS–J).  
12 *Japanese Journal of Clinical Oncology* 2014;44(5):456–62. doi:  
13 10.1093/jjco/hyu032  
14
- 15 42. Muramatsu K, Miyaoka H, Kamijima K, et al. The patient health questionnaire,  
16 Japanese version: validity according to the mini–international  
17 neuropsychiatric interview–plus. *Psychological reports* 2007;101(3 Pt 1):952–  
18 60. doi: 10.2466/pr0.101.3.952–960 [published Online First: 2008/02/01]  
19
- 20 43. Okajima I, Nakajima S, Kobayashi M, et al. Development and validation of the  
21 Japanese version of the Athens Insomnia Scale. *Psychiatry and clinical  
22 neurosciences* 2013;67(6):420–25. doi: 10.1111/pcn.12073 [published Online  
23 First: 2013/08/05]  
24
- 25 44. Soldatos CR, Dikeos DG, Paparrigopoulos TJ. Athens Insomnia Scale: validation  
26 of an instrument based on ICD–10 criteria. *Journal of psychosomatic  
27 research* 2000;48(6):555–60.  
28
- 29 45. Rabin R, de Charro F. EQ–5D: a measure of health status from the EuroQol  
30 Group. *Annals of medicine* 2001;33(5):337–43. [published Online First:  
31 2001/08/09]  
32
- 33 46. Tsuchiya A, Ikeda S, Ikegami N, et al. Estimating an EQ–5D population value set:  
34 the case of Japan. *Health economics* 2002;11(4):341–53. doi: 10.1002/hec.673  
35 [published Online First: 2002/05/15]  
36
- 37 47. Monda V, Villano I, Messina A, et al. Exercise Modifies the Gut Microbiota with  
38 Positive Health Effects. *Oxidative medicine and cellular longevity*  
39 2017;2017:3831972. doi: 10.1155/2017/3831972 [published Online First:  
40 2017/03/31]  
41
- 42 48. Zebrowska A, Mizia–Stec K, Mizia M, et al. Omega–3 fatty acids supplementation  
43 improves endothelial function and maximal oxygen uptake in endurance–  
44 trained athletes. *European journal of sport science* 2015;15(4):305–14. doi:  
45 10.1080/17461391.2014.949310 [published Online First: 2014/09/02]  
46  
47  
48  
49  
50  
51  
52  
53  
54  
55  
56  
57  
58  
59  
60

- 1  
2  
3  
4  
5  
6 49. Liu G, Muhlhausler BS, Gibson RA. A method for long term stabilisation of long  
7 chain polyunsaturated fatty acids in dried blood spots and its clinical  
8 application. *Prostaglandins, leukotrienes, and essential fatty acids*  
9 2014;91(6):251–60. doi: 10.1016/j.plefa.2014.09.009 [published Online First:  
10 2014/12/03]  
11  
12  
13  
14 50. Scribbans TD, Vecsey S, Hankinson PB, et al. The Effect of Training Intensity on  
15 VO2max in Young Healthy Adults: A Meta-Regression and Meta-Analysis.  
16 *International journal of exercise science* 2016;9(2):230–47. [published Online  
17 First: 2016/05/18]  
18  
19  
20 51. Courneya KS, Mackey JR, Bell GJ, et al. Randomized controlled trial of exercise  
21 training in postmenopausal breast cancer survivors: cardiopulmonary and  
22 quality of life outcomes. *J Clin Oncol* 2003;21(9):1660–8. doi:  
23 10.1200/jco.2003.04.093 [published Online First: 2003/05/02]  
24  
25  
26 52. Shapiro CL, Recht A. Side effects of adjuvant treatment of breast cancer. *The*  
27 *New England journal of medicine* 2001;344(26):1997–2008. doi:  
28 10.1056/nejm200106283442607 [published Online First: 2001/06/30]  
29  
30  
31 53. Peel JB, Sui X, Adams SA, et al. A prospective study of cardiorespiratory fitness  
32 and breast cancer mortality. *Med Sci Sports Exerc* 2009;41(4):742–8. doi:  
33 10.1249/MSS.0b013e31818edac7 [published Online First: 2009/03/12]  
34  
35  
36 54. Jones LW, Courneya KS, Mackey JR, et al. Cardiopulmonary function and age-  
37 related decline across the breast cancer survivorship continuum. *J Clin*  
38 *Oncol* 2012;30(20):2530–7. doi: 10.1200/JCO.2011.39.9014 [published Online  
39 First: 2012/05/23]  
40  
41  
42 55. Okumatsu K, Tsujimoto T, Wakaba K, et al. Physical fitness level in Japanese  
43 breast cancer survivors. *Japanese Journal of Physical Fitness and Sports*  
44 *Medicine* 2018;67(2):169–76. doi: 10.7600/jspfsm.67.169  
45  
46  
47  
48  
49  
50  
51  
52  
53  
54  
55  
56  
57  
58  
59  
60



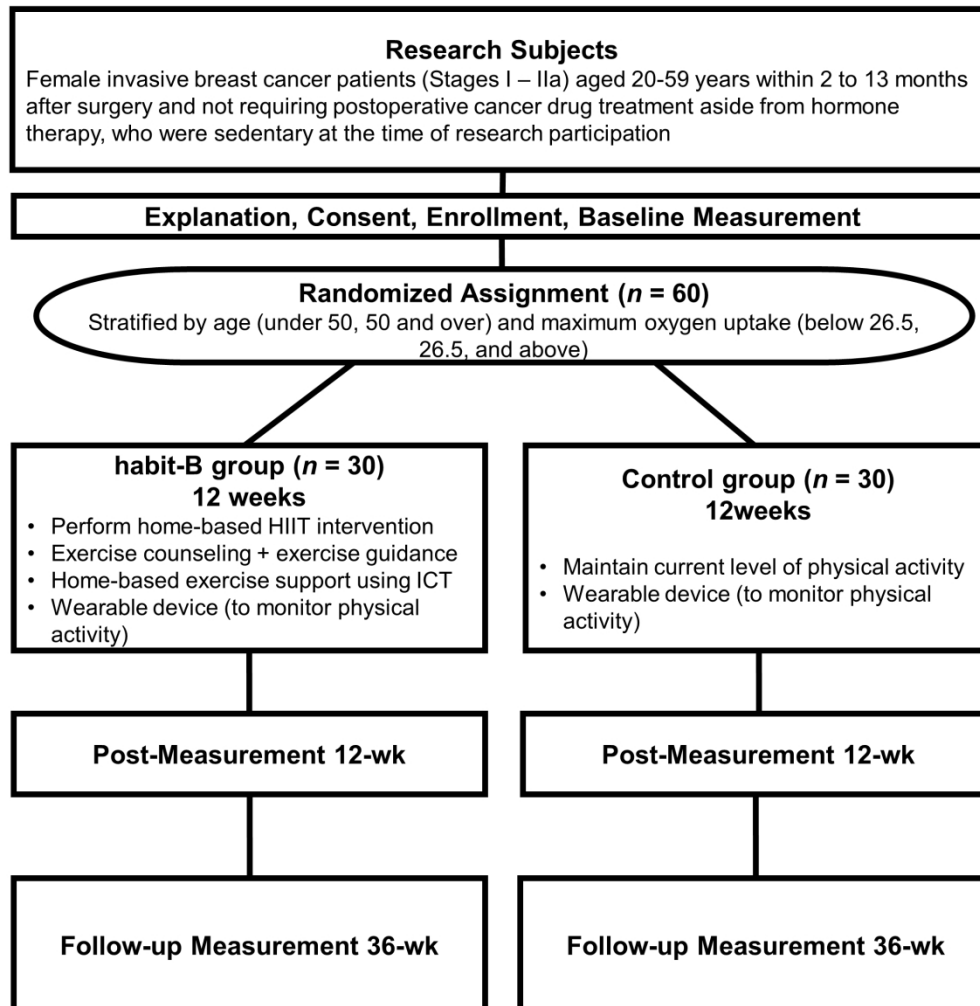



1  
2  
3  
4  
5  
6  
7  
8  
9  
10  
11  
12  
13  
14  
15  
16  
17  
18  
19  
20  
21  
22  
23  
24  
25  
26  
27  
28  
29  
30  
31  
32  
33  
34  
35  
36  
37  
38  
39  
40  
41  
42  
43  
44  
45  
46  
47  
48  
49  
50  
51  
52  
53  
54  
55  
56  
57  
58  
59  
60

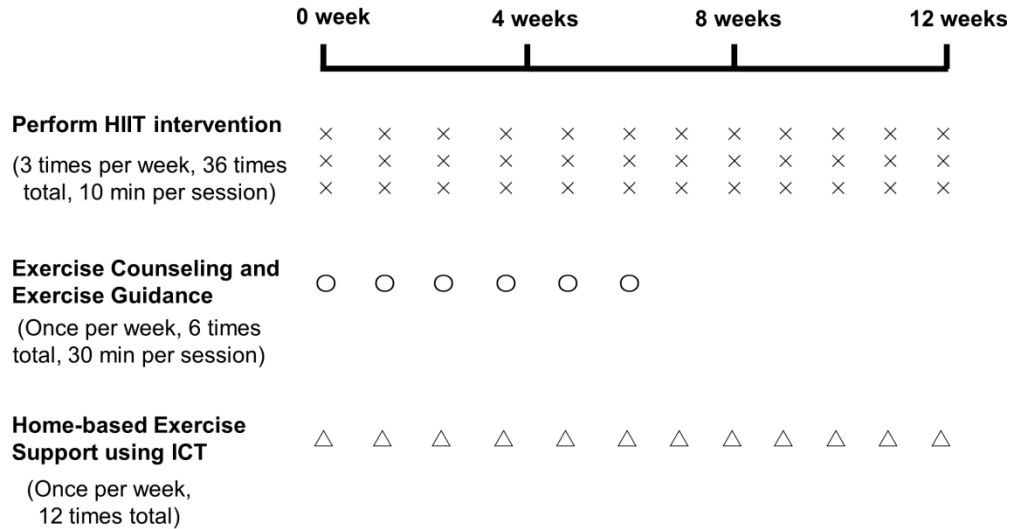

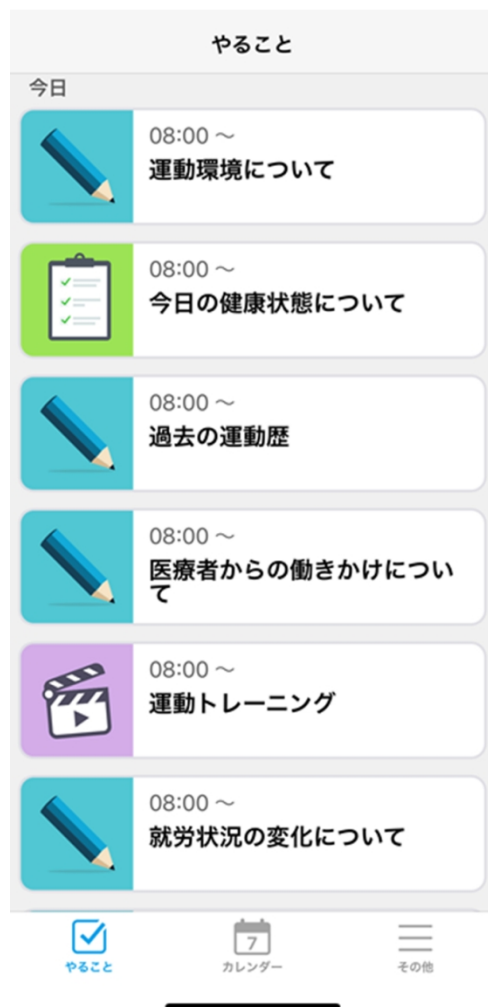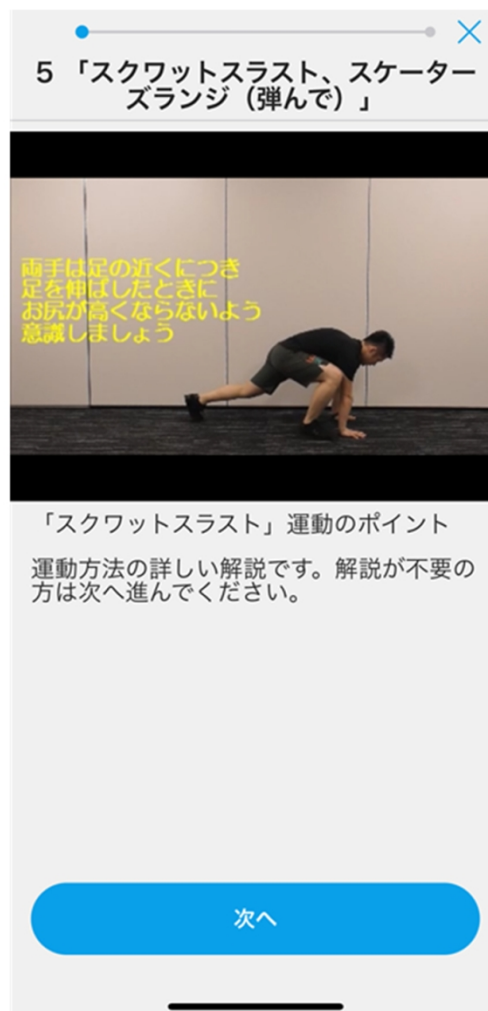

1  
2  
3  
4  
5  
6  
7  
8  
9  
10  
11  
12  
13  
14  
15  
16  
17  
18  
19  
20  
21  
22  
23  
24  
25  
26  
27  
28  
29  
30  
31  
32  
33  
34  
35  
36  
37  
38  
39  
40  
41  
42  
43  
44  
45  
46  
47  
48  
49  
50  
51  
52  
53  
54  
55  
56  
57  
58  
59  
60

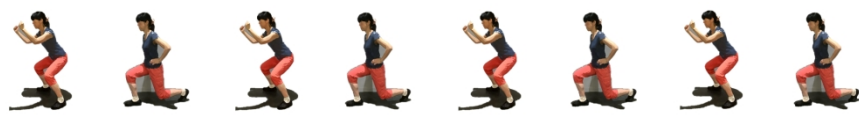

|                          |       |      |       |      |       |      |       |      |       |      |       |      |       |      |       |                 |
|--------------------------|-------|------|-------|------|-------|------|-------|------|-------|------|-------|------|-------|------|-------|-----------------|
| 3 min and 10 sec Warm up | Squat | rest | Lunge | rest | Squat | rest | Lunge | rest | Squat | rest | Lunge | rest | Squat | rest | Lunge | 3 min cool down |
|                          | 20 s  | 10 s | 20 s  |                 |

10 min

1  
2  
3  
4  
5  
6  
7  
8  
9  
10  
11  
12  
13  
14  
15  
16  
17  
18  
19  
20  
21  
22  
23  
24  
25  
26  
27  
28  
29  
30  
31  
32  
33  
34  
35  
36  
37  
38  
39  
40  
41  
42  
43  
44  
45  
46  
47  
48  
49  
50  
51  
52  
53  
54  
55  
56  
57  
58  
59  
60



NCC 法政大学  
habit-B

1人ではなくみんなで頑張りましょう!

---

【TSUKIJI habit-B プロジェクト】  
現在、私たちは乳がんサバイバー向けに有酸素能力を向上させるための運動プログラムを開発しています。

〒104-0045 東京都中央区豊町5-1-1  
https://www.ncc.go.jp/cj/cp/ab/d/online/habit\_b\_support/project/20181228175920.html  
お問い合わせ habit-Bプロジェクト  
国立がん研究センター 健康室 / 法政大学 健康実習



*Let's training*

乳がんサバイバーのあなたへ

## 体力向上のためのトレーニング

自宅で継続・安心トレーニングのご紹介



こんなことありませんか？

|                                         |                                        |
|-----------------------------------------|----------------------------------------|
| <input type="checkbox"/> 体力の低下を感じている    | <input type="checkbox"/> 旧もとの体力に戻したい   |
| <input type="checkbox"/> 疲れやすく感じる       | <input type="checkbox"/> 一人でトレーニングは不安だ |
| <input type="checkbox"/> そろそろ運動をはじめてみたい | <input type="checkbox"/> 毎日を楽しんで過ごしたい  |

毎日の生活に運動を取り入れましょう!

### 疲れにくいカラダをつくる4つの運動

心臓機能を高く維持することは疲れにくいカラダをつくり、乳がんサバイバーにとってきわめて重要です。下記の運動は、ふともやおしりの筋肉を意識しながら丁寧に実施することで運動中に心拍数を上昇させて心臓機能を向上させます。さらにこれらの運動は認識やサルコペニアの予防にも役立ちます。

**Step 1**



**Point**  
膝つま先の向きを揃えましょう

**Step 2**



**Point**  
膝つま先の向きを揃えて、両足のつま先を揃えましょう

**Step 3**



**Point**  
膝を深く落としましょう

**Step 4**



**Point**  
しゃがみ込むとき、膝立ての姿勢から立ち上がり、膝を一歩スライドの姿勢を繰り返しましょう。

| 運動強度 ★                                                                           | 運動強度 ★★                                                                             | 運動強度 ★★★                                                                                                            | 運動強度 ★★★★★                                                                                                                                                                                             |
|----------------------------------------------------------------------------------|-------------------------------------------------------------------------------------|---------------------------------------------------------------------------------------------------------------------|--------------------------------------------------------------------------------------------------------------------------------------------------------------------------------------------------------|
| <p><b>スクワット</b></p> <p>足を肩幅からやや広めに広げ、お尻を後ろに突き出しながら、上体を倒し過ぎないように膝の曲げ伸ばしを行います。</p> | <p><b>フロントランジ</b></p> <p>片足づつ足を前に出しましょう。背筋を伸ばして、前に出した足の膝がつま先より前に出ないように膝を曲げましょう。</p> | <p><b>ステイパーズランジ</b></p> <p>左右のジャンプ動作が含まれます。膝へ負担がかかる姿勢を避けるように注意しましょう。背筋の曲も、膝つま先の向きを揃えて、次の動作へスムーズにつなげられるようにしましょう。</p> | <p><b>バーピー</b></p> <p>全身を効率よく動かす運動です。</p> <ol style="list-style-type: none"> <li>①しゃがみこんで手をつく</li> <li>②手をついたまま飛び跳ねて足を後ろに伸ばして、膝が足先の姿勢になる</li> <li>③飛び跳ねて膝を曲げて、しゃがみこんだ姿勢にもどる</li> <li>④立ち上がる</li> </ol> |

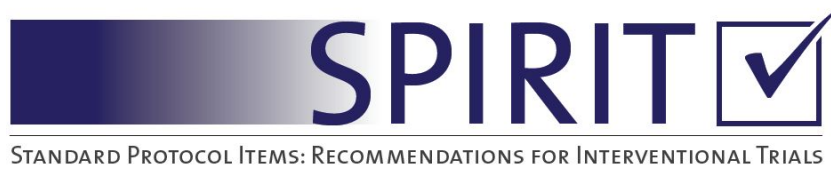

STANDARD PROTOCOL ITEMS: RECOMMENDATIONS FOR INTERVENTIONAL TRIALS

SPIRIT 2013 Checklist: Recommended items to address in a clinical trial protocol and related documents\*

| Section/item                      | Item No | Description                                                                                                                                                                                                                                                                                    |
|-----------------------------------|---------|------------------------------------------------------------------------------------------------------------------------------------------------------------------------------------------------------------------------------------------------------------------------------------------------|
| <b>Administrative information</b> |         |                                                                                                                                                                                                                                                                                                |
| Title                             | 1       | Descriptive title identifying the study design, population, interventions, and, if applicable, trial acronym (p1)                                                                                                                                                                              |
| Trial registration                | 2a      | Trial identifier and registry name. If not yet registered, name of intended registry (p4, 20)                                                                                                                                                                                                  |
|                                   | 2b      | All items from the World Health Organization Trial Registration Data Set (n/a)                                                                                                                                                                                                                 |
| Protocol version                  | 3       | Date and version identifier (p4, 20)                                                                                                                                                                                                                                                           |
| Funding                           | 4       | Sources and types of financial, material, and other support (p23)                                                                                                                                                                                                                              |
| Roles and responsibilities        | 5a      | Names, affiliations, and roles of protocol contributors (p23)                                                                                                                                                                                                                                  |
|                                   | 5b      | Name and contact information for the trial sponsor (p23)                                                                                                                                                                                                                                       |
|                                   | 5c      | Role of study sponsor and funders, if any, in study design; collection, management, analysis, and interpretation of data; writing of the report; and the decision to submit the report for publication, including whether they will have ultimate authority over any of these activities (n/a) |
|                                   | 5d      | Composition, roles, and responsibilities of the coordinating centre, steering committee, endpoint adjudication committee, data management team, and other individuals or groups overseeing the trial, if applicable (see Item 21a for data monitoring committee) (n/a)                         |
| <b>Introduction</b>               |         |                                                                                                                                                                                                                                                                                                |
| Background and rationale          | 6a      | Description of research question and justification for undertaking the trial, including summary of relevant studies (published and unpublished) examining benefits and harms for each intervention (p6)                                                                                        |
|                                   | 6b      | Explanation for choice of comparators (p11)                                                                                                                                                                                                                                                    |
| Objectives                        | 7       | Specific objectives or hypotheses (p6)                                                                                                                                                                                                                                                         |
| Trial design                      | 8       | Description of trial design including type of trial (eg, parallel group, crossover, factorial, single group), allocation ratio, and framework (eg, superiority, equivalence, noninferiority, exploratory) (p8)                                                                                 |

## Methods: Participants, interventions, and outcomes

|                      |     |                                                                                                                                                                                                                                                                                                                                                                                                          |
|----------------------|-----|----------------------------------------------------------------------------------------------------------------------------------------------------------------------------------------------------------------------------------------------------------------------------------------------------------------------------------------------------------------------------------------------------------|
| Study setting        | 9   | Description of study settings (eg, community clinic, academic hospital) and list of countries where data will be collected. Reference to where list of study sites can be obtained( <a href="#">p5</a> )                                                                                                                                                                                                 |
| Eligibility criteria | 10  | Inclusion and exclusion criteria for participants. If applicable, eligibility criteria for study centres and individuals who will perform the interventions (eg, surgeons, psychotherapists) ( <a href="#">p8,9</a> )                                                                                                                                                                                    |
| Interventions        | 11a | Interventions for each group with sufficient detail to allow replication, including how and when they will be administered( <a href="#">p9-11</a> )                                                                                                                                                                                                                                                      |
|                      | 11b | Criteria for discontinuing or modifying allocated interventions for a given trial participant (eg, drug dose change in response to harms, participant request, or improving/worsening disease) ( <a href="#">p13</a> )                                                                                                                                                                                   |
|                      | 11c | Strategies to improve adherence to intervention protocols, and any procedures for monitoring adherence (eg, drug tablet return, laboratory tests) ( <a href="#">p11</a> )                                                                                                                                                                                                                                |
|                      | 11d | Relevant concomitant care and interventions that are permitted or prohibited during the trial( <a href="#">p12,13</a> )                                                                                                                                                                                                                                                                                  |
| Outcomes             | 12  | Primary, secondary, and other outcomes, including the specific measurement variable (eg, systolic blood pressure), analysis metric (eg, change from baseline, final value, time to event), method of aggregation (eg, median, proportion), and time point for each outcome. Explanation of the clinical relevance of chosen efficacy and harm outcomes is strongly recommended( <a href="#">p14-18</a> ) |
| Participant timeline | 13  | Time schedule of enrolment, interventions (including any run-ins and washouts), assessments, and visits for participants. A schematic diagram is highly recommended (see <a href="#">Figure 1,2, and Table 1</a> )                                                                                                                                                                                       |
| Sample size          | 14  | Estimated number of participants needed to achieve study objectives and how it was determined, including clinical and statistical assumptions supporting any sample size calculations( <a href="#">p19</a> )                                                                                                                                                                                             |
| Recruitment          | 15  | Strategies for achieving adequate participant enrolment to reach target sample size( <a href="#">n/a</a> )                                                                                                                                                                                                                                                                                               |

## Methods: Assignment of interventions (for controlled trials)

### Allocation:

|                     |     |                                                                                                                                                                                                                                                                                                                                                                                   |
|---------------------|-----|-----------------------------------------------------------------------------------------------------------------------------------------------------------------------------------------------------------------------------------------------------------------------------------------------------------------------------------------------------------------------------------|
| Sequence generation | 16a | Method of generating the allocation sequence (eg, computer-generated random numbers), and list of any factors for stratification. To reduce predictability of a random sequence, details of any planned restriction (eg, blocking) should be provided in a separate document that is unavailable to those who enrol participants or assign interventions( <a href="#">p8,12</a> ) |
|---------------------|-----|-----------------------------------------------------------------------------------------------------------------------------------------------------------------------------------------------------------------------------------------------------------------------------------------------------------------------------------------------------------------------------------|

|    |                |     |                                                                            |
|----|----------------|-----|----------------------------------------------------------------------------|
| 1  |                |     |                                                                            |
| 2  | Allocation     | 16b | Mechanism of implementing the allocation sequence (eg, central             |
| 3  | concealment    |     | telephone; sequentially numbered, opaque, sealed envelopes),               |
| 4  | mechanism      |     | describing any steps to conceal the sequence until interventions are       |
| 5  |                |     | assigned( <a href="#">p8,12</a> )                                          |
| 6  |                |     |                                                                            |
| 7  | Implementation | 16c | Who will generate the allocation sequence, who will enrol participants,    |
| 8  |                |     | and who will assign participants to interventions( <a href="#">p8,12</a> ) |
| 9  |                |     |                                                                            |
| 10 | Blinding       | 17a | Who will be blinded after assignment to interventions (eg, trial           |
| 11 | (masking)      |     | participants, care providers, outcome assessors, data analysts), and       |
| 12 |                |     | how( <a href="#">p12</a> )                                                 |
| 13 |                |     |                                                                            |
| 14 |                | 17b | If blinded, circumstances under which unblinding is permissible, and       |
| 15 |                |     | procedure for revealing a participant's allocated intervention during      |
| 16 |                |     | the trial( <a href="#">n/a</a> )                                           |
| 17 |                |     |                                                                            |
| 18 |                |     |                                                                            |
| 19 |                |     |                                                                            |

### Methods: Data collection, management, and analysis

|    |                 |     |                                                                                      |
|----|-----------------|-----|--------------------------------------------------------------------------------------|
| 21 | Data collection | 18a | Plans for assessment and collection of outcome, baseline, and other                  |
| 22 | methods         |     | trial data, including any related processes to promote data quality (eg,             |
| 23 |                 |     | duplicate measurements, training of assessors) and a description of                  |
| 24 |                 |     | study instruments (eg, questionnaires, laboratory tests) along with                  |
| 25 |                 |     | their reliability and validity, if known. Reference to where data                    |
| 26 |                 |     | collection forms can be found, if not in the protocol( <a href="#">p18</a> )         |
| 27 |                 |     |                                                                                      |
| 28 |                 | 18b | Plans to promote participant retention and complete follow-up,                       |
| 29 |                 |     | including list of any outcome data to be collected for participants who              |
| 30 |                 |     | discontinue or deviate from intervention protocols( <a href="#">p10,13</a> )         |
| 31 |                 |     |                                                                                      |
| 32 | Data            | 19  | Plans for data entry, coding, security, and storage, including any                   |
| 33 | management      |     | related processes to promote data quality (eg, double data entry;                    |
| 34 |                 |     | range checks for data values). Reference to where details of data                    |
| 35 |                 |     | management procedures can be found, if not in the protocol( <a href="#">p11,12</a> ) |
| 36 |                 |     |                                                                                      |
| 37 |                 |     |                                                                                      |
| 38 |                 |     |                                                                                      |
| 39 |                 |     |                                                                                      |
| 40 | Statistical     | 20a | Statistical methods for analysing primary and secondary outcomes.                    |
| 41 | methods         |     | Reference to where other details of the statistical analysis plan can be             |
| 42 |                 |     | found, if not in the protocol( <a href="#">p18,19</a> )                              |
| 43 |                 |     |                                                                                      |
| 44 |                 | 20b | Methods for any additional analyses (eg, subgroup and adjusted                       |
| 45 |                 |     | analyses) ( <a href="#">p18,19</a> )                                                 |
| 46 |                 |     |                                                                                      |
| 47 |                 | 20c | Definition of analysis population relating to protocol non-adherence                 |
| 48 |                 |     | (eg, as randomised analysis), and any statistical methods to handle                  |
| 49 |                 |     | missing data (eg, multiple imputation) ( <a href="#">p18,19</a> )                    |
| 50 |                 |     |                                                                                      |
| 51 |                 |     |                                                                                      |

### Methods: Monitoring

|    |                 |     |                                                                                    |
|----|-----------------|-----|------------------------------------------------------------------------------------|
| 52 |                 |     |                                                                                    |
| 53 |                 |     |                                                                                    |
| 54 | Data monitoring | 21a | Composition of data monitoring committee (DMC); summary of its role                |
| 55 |                 |     | and reporting structure; statement of whether it is independent from               |
| 56 |                 |     | the sponsor and competing interests; and reference to where further                |
| 57 |                 |     | details about its charter can be found, if not in the protocol.                    |
| 58 |                 |     | Alternatively, an explanation of why a DMC is not needed( <a href="#">p11,12</a> ) |
| 59 |                 |     |                                                                                    |
| 60 |                 |     |                                                                                    |

|    |          |     |                                                                                                                                                                                        |
|----|----------|-----|----------------------------------------------------------------------------------------------------------------------------------------------------------------------------------------|
| 1  |          | 21b | Description of any interim analyses and stopping guidelines, including who will have access to these interim results and make the final decision to terminate the trial(n/a)           |
| 2  |          |     |                                                                                                                                                                                        |
| 3  |          |     |                                                                                                                                                                                        |
| 4  |          |     |                                                                                                                                                                                        |
| 5  |          |     |                                                                                                                                                                                        |
| 6  | Harms    | 22  | Plans for collecting, assessing, reporting, and managing solicited and spontaneously reported adverse events and other unintended effects of trial interventions or trial conduct(p17) |
| 7  |          |     |                                                                                                                                                                                        |
| 8  |          |     |                                                                                                                                                                                        |
| 9  |          |     |                                                                                                                                                                                        |
| 10 | Auditing | 23  | Frequency and procedures for auditing trial conduct, if any, and whether the process will be independent from investigators and the sponsor(p11,12)                                    |
| 11 |          |     |                                                                                                                                                                                        |
| 12 |          |     |                                                                                                                                                                                        |
| 13 |          |     |                                                                                                                                                                                        |
| 14 |          |     |                                                                                                                                                                                        |

### Ethics and dissemination

|    |                               |     |                                                                                                                                                                                                                                                                                            |
|----|-------------------------------|-----|--------------------------------------------------------------------------------------------------------------------------------------------------------------------------------------------------------------------------------------------------------------------------------------------|
| 15 |                               |     |                                                                                                                                                                                                                                                                                            |
| 16 |                               |     |                                                                                                                                                                                                                                                                                            |
| 17 | Research ethics approval      | 24  | Plans for seeking research ethics committee/institutional review board (REC/IRB) approval(p4)                                                                                                                                                                                              |
| 18 |                               |     |                                                                                                                                                                                                                                                                                            |
| 19 |                               |     |                                                                                                                                                                                                                                                                                            |
| 20 |                               |     |                                                                                                                                                                                                                                                                                            |
| 21 | Protocol amendments           | 25  | Plans for communicating important protocol modifications (eg, changes to eligibility criteria, outcomes, analyses) to relevant parties (eg, investigators, REC/IRBs, trial participants, trial registries, journals, regulators) (n/a)                                                     |
| 22 |                               |     |                                                                                                                                                                                                                                                                                            |
| 23 |                               |     |                                                                                                                                                                                                                                                                                            |
| 24 |                               |     |                                                                                                                                                                                                                                                                                            |
| 25 |                               |     |                                                                                                                                                                                                                                                                                            |
| 26 | Consent or assent             | 26a | Who will obtain informed consent or assent from potential trial participants or authorised surrogates, and how (see Item 32) (n/a)                                                                                                                                                         |
| 27 |                               |     |                                                                                                                                                                                                                                                                                            |
| 28 |                               |     |                                                                                                                                                                                                                                                                                            |
| 29 |                               | 26b | Additional consent provisions for collection and use of participant data and biological specimens in ancillary studies, if applicable(n/a)                                                                                                                                                 |
| 30 |                               |     |                                                                                                                                                                                                                                                                                            |
| 31 |                               |     |                                                                                                                                                                                                                                                                                            |
| 32 |                               |     |                                                                                                                                                                                                                                                                                            |
| 33 | Confidentiality               | 27  | How personal information about potential and enrolled participants will be collected, shared, and maintained in order to protect confidentiality before, during, and after the trial(p12)                                                                                                  |
| 34 |                               |     |                                                                                                                                                                                                                                                                                            |
| 35 |                               |     |                                                                                                                                                                                                                                                                                            |
| 36 |                               |     |                                                                                                                                                                                                                                                                                            |
| 37 | Declaration of interests      | 28  | Financial and other competing interests for principal investigators for the overall trial and each study site(p23)                                                                                                                                                                         |
| 38 |                               |     |                                                                                                                                                                                                                                                                                            |
| 39 |                               |     |                                                                                                                                                                                                                                                                                            |
| 40 | Access to data                | 29  | Statement of who will have access to the final trial dataset, and disclosure of contractual agreements that limit such access for investigators(n/a)                                                                                                                                       |
| 41 |                               |     |                                                                                                                                                                                                                                                                                            |
| 42 |                               |     |                                                                                                                                                                                                                                                                                            |
| 43 |                               |     |                                                                                                                                                                                                                                                                                            |
| 44 |                               |     |                                                                                                                                                                                                                                                                                            |
| 45 | Ancillary and post-trial care | 30  | Provisions, if any, for ancillary and post-trial care, and for compensation to those who suffer harm from trial participation(p17,18)                                                                                                                                                      |
| 46 |                               |     |                                                                                                                                                                                                                                                                                            |
| 47 |                               |     |                                                                                                                                                                                                                                                                                            |
| 48 | Dissemination policy          | 31a | Plans for investigators and sponsor to communicate trial results to participants, healthcare professionals, the public, and other relevant groups (eg, via publication, reporting in results databases, or other data sharing arrangements), including any publication restrictions(p4,20) |
| 49 |                               |     |                                                                                                                                                                                                                                                                                            |
| 50 |                               |     |                                                                                                                                                                                                                                                                                            |
| 51 |                               |     |                                                                                                                                                                                                                                                                                            |
| 52 |                               |     |                                                                                                                                                                                                                                                                                            |
| 53 |                               |     |                                                                                                                                                                                                                                                                                            |
| 54 |                               |     |                                                                                                                                                                                                                                                                                            |
| 55 |                               | 31b | Authorship eligibility guidelines and any intended use of professional writers(p11)                                                                                                                                                                                                        |
| 56 |                               |     |                                                                                                                                                                                                                                                                                            |
| 57 |                               |     |                                                                                                                                                                                                                                                                                            |
| 58 |                               | 31c | Plans, if any, for granting public access to the full protocol, participant-level dataset, and statistical code(n/a)                                                                                                                                                                       |
| 59 |                               |     |                                                                                                                                                                                                                                                                                            |
| 60 |                               |     |                                                                                                                                                                                                                                                                                            |



**Appendices**

|                            |    |                                                                                                                                                                                                                      |
|----------------------------|----|----------------------------------------------------------------------------------------------------------------------------------------------------------------------------------------------------------------------|
| Informed consent materials | 32 | Model consent form and other related documentation given to participants and authorised surrogates <a href="#">(n/a)</a>                                                                                             |
| Biological specimens       | 33 | Plans for collection, laboratory evaluation, and storage of biological specimens for genetic or molecular analysis in the current trial and for future use in ancillary studies, if applicable <a href="#">(p17)</a> |

---

\*It is strongly recommended that this checklist be read in conjunction with the SPIRIT 2013 Explanation & Elaboration for important clarification on the items. Amendments to the protocol should be tracked and dated. The SPIRIT checklist is copyrighted by the SPIRIT Group under the Creative Commons "[Attribution-NonCommercial-NoDerivs 3.0 Unported](#)" license.

For peer review only

# BMJ Open

## Effect of home-based high-intensity interval training and behavioral modification using information and communication technology on cardiorespiratory fitness and exercise habits among sedentary breast cancer survivors: the habit-B study protocol for a randomized controlled trial

|                                 |                                                                                                                                                                                                                                                                                                                                                                                                                                                                                                                                                                                                                                                                                                                                                                                                                                                                                                                                                                                                                                                                                                                                                                   |
|---------------------------------|-------------------------------------------------------------------------------------------------------------------------------------------------------------------------------------------------------------------------------------------------------------------------------------------------------------------------------------------------------------------------------------------------------------------------------------------------------------------------------------------------------------------------------------------------------------------------------------------------------------------------------------------------------------------------------------------------------------------------------------------------------------------------------------------------------------------------------------------------------------------------------------------------------------------------------------------------------------------------------------------------------------------------------------------------------------------------------------------------------------------------------------------------------------------|
| Journal:                        | <i>BMJ Open</i>                                                                                                                                                                                                                                                                                                                                                                                                                                                                                                                                                                                                                                                                                                                                                                                                                                                                                                                                                                                                                                                                                                                                                   |
| Manuscript ID                   | bmjopen-2019-030911.R2                                                                                                                                                                                                                                                                                                                                                                                                                                                                                                                                                                                                                                                                                                                                                                                                                                                                                                                                                                                                                                                                                                                                            |
| Article Type:                   | Protocol                                                                                                                                                                                                                                                                                                                                                                                                                                                                                                                                                                                                                                                                                                                                                                                                                                                                                                                                                                                                                                                                                                                                                          |
| Date Submitted by the Author:   | 16-Jul-2019                                                                                                                                                                                                                                                                                                                                                                                                                                                                                                                                                                                                                                                                                                                                                                                                                                                                                                                                                                                                                                                                                                                                                       |
| Complete List of Authors:       | Tsuji, Katsunori; National Cancer Center Japan, Division of Health Care Research, Center for Public Health Sciences<br>Ochi, Eisuke; National Cancer Center Japan, Division of Health Care Research, Center for Public Health Sciences; Hosei University, Faculty of Bioscience and Applied Chemistry<br>Okubo, Ryo; National Cancer Center Japan, Division of Health Care Research, Center for Public Health Sciences<br>Shimizu, Yoichi; National Cancer Center Japan, Division of Health Care Research, Center for Public Health Sciences<br>Kuchiba, Aya; National Cancer Center Japan, Division of Biostatistical Research, Center for Public Health Sciences; National Cancer Center Japan, Biostatistics Division, Center for Research Administration and Support<br>Ueno, Taro; SUSMED, Inc.<br>Shimazu, Taichi; National Cancer Center Japan, Division of Prevention, Center for Public Health Sciences<br>Kinoshita, Takayuki; National Cancer Center Hospital, Department of Breast Surgery<br>Sakurai, Naomi; Cancer Solutions<br>Matsuoka, Yutaka; National Cancer Center Japan, Division of Health Care Research, Center for Public Health Sciences |
| <b>Primary Subject Heading</b>: | Sports and exercise medicine                                                                                                                                                                                                                                                                                                                                                                                                                                                                                                                                                                                                                                                                                                                                                                                                                                                                                                                                                                                                                                                                                                                                      |
| Secondary Subject Heading:      | Mental health, Oncology                                                                                                                                                                                                                                                                                                                                                                                                                                                                                                                                                                                                                                                                                                                                                                                                                                                                                                                                                                                                                                                                                                                                           |
| Keywords:                       | Breast tumours < ONCOLOGY, SPORTS MEDICINE, PREVENTIVE MEDICINE, CLINICAL PHYSIOLOGY                                                                                                                                                                                                                                                                                                                                                                                                                                                                                                                                                                                                                                                                                                                                                                                                                                                                                                                                                                                                                                                                              |
|                                 |                                                                                                                                                                                                                                                                                                                                                                                                                                                                                                                                                                                                                                                                                                                                                                                                                                                                                                                                                                                                                                                                                                                                                                   |

SCHOLARONE™  
Manuscripts

1  
2  
3  
4  
5  
6  
7  
8  
9  
10  
11  
12  
13  
14  
15  
16  
17  
18  
19  
20  
21  
22  
23  
24  
25  
26  
27  
28  
29  
30  
31  
32  
33  
34  
35  
36  
37  
38  
39  
40  
41  
42  
43  
44  
45  
46  
47  
48  
49  
50  
51  
52  
53  
54  
55  
56  
57  
58  
59  
60

## BMJ Open *Study protocols*

Effect of home-based high-intensity interval training and behavioral modification using information and communication technology on cardiorespiratory fitness and exercise habits among sedentary breast cancer survivors: the habit-B study protocol for a randomized controlled trial

Katsunori Tsuji<sup>1\*</sup>, Eisuke Ochi<sup>1, 2\*</sup>, Ryo Okubo<sup>1</sup>, Yoichi Shimizu<sup>1</sup>, Aya Kuchiba<sup>3,4</sup>, Taro Ueno<sup>5</sup>, Taichi Shimazu<sup>6</sup>, Takayuki Kinoshita<sup>7</sup>, Naomi Sakurai<sup>8</sup>, Yutaka J. Matsuoka<sup>1</sup>

1. Division of Health Care Research, Center for Public Health Sciences, National Cancer Center Japan, Tokyo, Japan
2. Faculty of Bioscience and Applied Chemistry, Hosei University, Tokyo, Japan
3. Division of Biostatistical Research, Center for Public Health Sciences, National Cancer Center Japan, Tokyo, Japan
4. Biostatistics Division, Center for Research Administration and Support, National Cancer Center Japan, Tokyo, Japan
5. SUSMED, Inc., Tokyo, Japan
6. Division of Prevention, Center for Public Health Sciences, National Cancer Center Japan, Tokyo, Japan
7. Department of Breast Surgery, National Cancer Center Hospital, Tokyo, Japan
8. Cancer Solutions, Tokyo, Japan

\* These two authors contributed equally to this work

Corresponding author

Yutaka J. Matsuoka, MD, PhD

Division of Health Care Research, Center for Public Health Sciences, National

1  
2  
3  
4  
5  
6  
7  
8  
9  
10  
11  
12  
13  
14  
15  
16  
17  
18  
19  
20  
21  
22  
23  
24  
25  
26  
27  
28  
29  
30  
31  
32  
33  
34  
35  
36  
37  
38  
39  
40  
41  
42  
43  
44  
45  
46  
47  
48  
49  
50  
51  
52  
53  
54  
55  
56  
57  
58  
59  
60

Cancer Center Japan, Tokyo, Japan

E-mail address: yumatsuo@ncc.go.jp, Phone: +81-3-3547-5201 ext. 3382

For peer review only

## ABSTRACT

### Introduction

Maintaining high levels of physical activity not only helps to maintain and improve physical health and quality of life, but also plays a role in reducing adverse effects due to cancer treatments. Moreover, a greater degree of cardiorespiratory fitness is associated with reduced risk of all-cause mortality. However, there are no home-based programs for improving cardiorespiratory fitness using body weight exercises for breast cancer survivors. This study will assess the efficacy of the newly developed habit-B program on maximum oxygen uptake compared with treatment as usual with wearable device. The effects of this program on exercise habits, level of physical activity, physical fitness, and subjective indices will also be investigated.

### Methods and analysis

This is a 12-week, parallel-group, single blind, randomized controlled trial. Allocation will be managed by a central server using a computer-generated random allocation sequence provided by an independent data center. Participants will be assigned to the habit-B Program (high-intensity interval training exercise, exercise counseling + guidance, home-based exercise support using information and communication technology, and a wearable device) or treatment as usual with a wearable device. Subjects will be sedentary women aged 20 to 59 years who have received breast surgery in the past 2 to 13 months after diagnosis of invasive breast cancer (Stage I-IIa) and have never received chemo-therapy except for

1  
2  
3  
4  
5  
6 hormone therapy. The primary endpoint is the change in peak oxygen uptake  
7  
8 ( $VO_{2peak}$ ; mL/kg/min) between the groups after 12 weeks of intervention.  
9

### 10 **Ethics and dissemination**

11  
12  
13 The study protocol was approved by the Institutional Review Board of the National  
14  
15  
16 Cancer Center Japan on 28 February 2019 (ID: 2018-347). The findings will be  
17  
18  
19 disseminated through peer reviewed publications and conference presentations.  
20

21  
22  
23 **Trial status** Study enrolment, intervention, and data collection are ongoing. The  
24  
25  
26 estimated end date for this study is on March 31, 2021.  
27

28  
29 **Trial registration number** UMIN000036400; Pre-results.  
30

### 31 **Strengths and limitations of this study**

- 32  
33  
34  
35  
36  
37  
38  
39  
40  
41  
42  
43  
44  
45  
46  
47  
48  
49  
50  
51  
52  
53  
54  
55  
56  
57
1. This clinical trial will be the world's first home-based HIIT program using ICT to increase cardiorespiratory fitness in sedentary breast cancer survivors.
  2. The habit-B program is designed based on the theory of Bandura for sedentary breast cancer survivors to develop exercise habits.
  3. Collaborative work with professionals in the field of clinical oncology, exercise science, mental health, rehabilitation, public health, nursing, and cancer survivors constitutes a new model for cancer survivorship care.
  4. We cannot rigorously exclude breast cancer survivors who may have exercise habits because the definition of sedentary subjects will be based on self-report.

### 58 **INTRODUCTION**

1  
2  
3  
4  
5  
6 Breast cancer, which is one of the most common cancers affecting women,  
7  
8 newly affects over 86,000 women each year<sup>1</sup>. It is recommended that cancer  
9  
10 survivors acquire and maintain healthy behaviors to extend survival, such as  
11  
12 staying reasonably fit through appropriate physical exercise and having a healthy  
13  
14 diet <sup>2</sup>. High levels of physical activity not only help to maintain and improve  
15  
16 physical health and quality of life (QOL), but also play a role in reducing short- and  
17  
18 long-term side effects of cancer treatment. The American Cancer Society guidelines  
19  
20 recommend a minimum of 150 min moderate physical activity or 75 min intensive  
21  
22 physical activity per week, in addition to usual physical activity in daily life<sup>3</sup>, and  
23  
24 the Japan Breast Cancer Society's Clinical Guidelines for Breast Cancer strongly  
25  
26 recommend maintaining a high level of physical activity<sup>4 5</sup>.

27  
28  
29  
30  
31  
32  
33 The ENERGY Trial, an early and representative study conducted in the US,  
34  
35 demonstrated the effectiveness of a home exercise program and nutritional advice  
36  
37 to promote weight loss among breast cancer survivors<sup>6</sup>. However, because the  
38  
39 proportion of overweight adults in Japan is lower than that in the US<sup>7</sup>, it is not  
40  
41 appropriate to adopt the US-developed program in Japan. It would appear suitable  
42  
43 though to develop intervention around measurements of  $VO_{2peak}$ , the globally  
44  
45 important health indicator of cardiorespiratory fitness <sup>8 9</sup>.

46  
47  
48  
49  
50  
51  $VO_{2peak}$  decreases with age, and a meta-analysis has suggested that women  
52  
53 who are sedentary have a decrease of 3.2 mL/kg/min over 10 years<sup>10</sup>. A cohort  
54  
55 study suggested that the all-cause mortality rate decreased by 17% for each 1  
56  
57 metabolic equivalent (MET) increase (3.5 mL/kg/min) in  $VO_{2peak}$  for women<sup>11</sup>. A  
58  
59  
60



1  
2  
3  
4  
5  
6 systematic review demonstrated that the median  $VO_{2peak}$  of breast cancer  
7  
8 survivors not receiving chemotherapy was lower than that of healthy sedentary  
9  
10 women (25.3 mL/kg/min vs. 29.7 mL/kg/min)<sup>12</sup>. In a 16-year follow-up study of  
11  
12 breast cancer survivors<sup>12</sup>, hazard ratios were 0.67 for the moderate  $VO_{2peak}$  group  
13  
14 (8.5 METs) and 0.45 for the high group (11.1 METs) compared with the low  $VO_{2peak}$   
15  
16 group (6.7 METs). In this report, the mortality rate was reduced by maintaining a  
17  
18  $VO_{2peak}$  of 8 METs or above<sup>12</sup>. Against this background, it is necessary to develop an  
19  
20 exercise program that will increase  $VO_{2peak}$  in breast cancer survivors.  
21  
22  
23  
24  
25

26 When considering how to increase  $VO_{2peak}$ , research has advanced in recent  
27  
28 years with the use of HIIT for athletes and sedentary populations<sup>13-15</sup>. HIIT allows  
29  
30 subjects to exercise at vigorous intensity within 10 min, resulting in improved  
31  
32 cardiorespiratory fitness<sup>9 16</sup>. A recent systematic review showed, based on the  
33  
34 findings of 12 studies of HIIT conducted in supervised experimental settings, that  
35  
36 HIIT appeared to be more beneficial than treatment as usual for improving  
37  
38 physical fitness and health-related outcomes in cancer survivors during any stage  
39  
40 of treatment and aftercare<sup>16</sup>. To our knowledge, only one study has evaluated  
41  
42 changes in cardiorespiratory fitness following a home-based HIIT program, which  
43  
44 involved healthy young women<sup>17</sup>. Given that no home-based HIIT programs with  
45  
46 body weight exercises have been reported for breast cancer survivors to date, it is  
47  
48 necessary to develop such programs and examine their efficacy and feasibility.  
49  
50  
51  
52  
53  
54

55 Recent emerging technologies such as smartphone applications (apps) and  
56  
57 wearable devices are promising tools for the monitoring of cancer patients' daily  
58  
59  
60

1  
2  
3  
4  
5  
6 activity levels and for facilitating coaching, self-monitoring, feedback, and  
7  
8 encouragement to exercise<sup>18,19</sup>. Apps<sup>20</sup> and wearable devices<sup>21</sup> are being used for  
9  
10 both subjective and objective measures in the field of clinical oncology. However,  
11  
12 further investigations are needed of their potential utility in objective evaluations  
13  
14 of physical activity as well as in lifestyle modification and maintenance and  
15  
16 enhancement of QOL in real-world settings.  
17  
18  
19

20  
21 The aim of this study is to investigate the effect of the newly developed  
22  
23 habit-B program, comprising **h**ome-based high-intensity interval training **a**nd  
24  
25 **b**ehavioral modification using **i**nformation and communication **t**echnology on  
26  
27 cardiorespiratory fitness and exercise habits for sedentary **b**reast cancer  
28  
29 survivors. We will investigate whether the habit-B program improves  $VO_{2peak}$   
30  
31 compared with a control group as well as investigate the safety and feasibility of  
32  
33 program. The secondary objectives are to investigate the effect of this program on  
34  
35 exercise habits, physical activity level, physical function, and subjective measures.  
36  
37  
38  
39  
40  
41  
42  
43  
44  
45  
46  
47  
48  
49  
50  
51  
52  
53  
54  
55  
56  
57  
58  
59  
60

## METHODS AND ANALYSIS

### Trial design

In this study 12-week, parallel-group, single blind, randomized controlled trial (Figure 1), participants will be randomly assigned to intervention either with the habit-B program (HIIT exercise, exercise counseling + guidance, home-based exercise support using ICT, and a wearable device) or treatment as usual with a wearable device (Fitbit Versa smart watch; Fitbit Inc., San Francisco, CA). An independent data center will provide computer-generated random allocation. Participants will be assigned by the minimization method, a form of dynamic randomization, using two prognostic factors:  $VO_{2peak}$  and age. Based on the allocation sequences, the contents of the app that participants use during the trial will be assigned automatically to either the habit-B program or control.

### Participants

The eligibility criteria for participants are as follows: (1) female, aged between 20 and 59 years at diagnosis (stages I-IIa); (2) diagnosed with invasive breast cancer within 2 to 13 months after surgery; (3) not requiring cancer chemotherapy aside from hormone therapy; (4) currently engages in not more than moderate intensity exercise for 30 min on 2 separate days per week (total of 60 min), which is based on the National Health and Nutrition Survey Japan<sup>22</sup>; (5) ability to complete an electronic patient reported outcome (e-PRO) questionnaire via a smartphone; (6) consent to trial participation obtained in writing from the

1  
2  
3  
4  
5  
6 patient themselves; and (7) ability to read, write, and understand Japanese. The  
7  
8 exclusion criteria are as follows: (1) judged to have severely reduced cognitive  
9  
10 function by a primary physician; (2) exercise judged to be risky by a primary  
11  
12 physician; (3) history of smoking within the previous 12 months; (4) body mass  
13  
14 index of 30 or above; (5) abnormal electrocardiogram in preoperative testing,  
15  
16 resting heart rate (HR) below 50 beats/min or above 100 beats/min, or stage III  
17  
18 hypertension or above (diastolic blood pressure over 110 mmHg or systolic blood  
19  
20 pressure over 180 mmHg); and (6) judged unfit for the trial by a primary physician  
21  
22 for other reasons such as the administration of beta-adrenergic blocking agents.  
23  
24  
25  
26  
27  
28  
29  
30

### 31 **Interventions**

32  
33 This will be a randomized, single-blind study. Participants will be  
34  
35 enrolled and assigned using an electronic data capture system with an app. The  
36  
37 protocol intervention will be started within 21 days of enrollment. If for some  
38  
39 reason the start is delayed beyond 21 days, the reason will be entered into the  
40  
41 electronic Case Report Form (eCRF). If it is determined that the intervention  
42  
43 cannot be started, the details will be noted in the eCRF as “protocol intervention  
44  
45 stopped.”  
46  
47  
48  
49  
50  
51

#### 52 53 The habit-B program group

54  
55 The habit-B program (Figure 2) comprises home-based exercise support  
56  
57 utilizing 6 weeks of exercise counseling/exercise guidance (once per week, 6 times  
58  
59  
60

1  
2  
3  
4  
5  
6 total, 30 min per session) and 12 weeks of ICT interventions, which are provided  
7  
8 with personalized e-mail (once per week, 12 times in total), and a newly developed  
9  
10 exercise app (during each exercise session, shown in Figure 3). Participants will be  
11  
12 encouraged to complete the following program HIIT using specific body weight  
13  
14 exercises for one 10-min training session 3 times a week for 12 weeks (total of 36  
15  
16 sessions during the trial period, as shown in Figures 2 and 4): (1) one bout of 10-  
17  
18 min exercises; (2) a total of 10 min exercise, comprising a 3-min warm-up, 4-min  
19  
20 training (8 sets of 20 s exercise + 10 s rest), and a 3-min cool-down; (3) these  
21  
22 training exercises are designed to increase in intensity each week; and (4) the  
23  
24 details of these exercises are divided into three stages according to  
25  
26 cardiorespiratory fitness ( $VO_{2peak}$ ) at Week 0 and the contents of training are  
27  
28 designed to increase physical strength incrementally in accordance with the  
29  
30 individual's level of strength. In addition, we will continue to follow up on the  
31  
32 between-group differences in e-PRO data of change from baseline to 24 and 36  
33  
34 weeks post-intervention.  
35  
36  
37  
38  
39  
40  
41  
42  
43

44 The social cognitive theory proposed by Bandura et al. may be helpful to  
45  
46 apply when considering interventions for behavioral change<sup>23</sup>, chiefly in that it  
47  
48 affords a framework for understanding the underlying reasons for making and  
49  
50 maintaining health behaviors<sup>24</sup>. Its key concepts involve (1) understanding of health  
51  
52 risks and benefits, (2) perceived self-efficacy of being able to control one's own  
53  
54 health habits, (3) projected costs and benefits or expected outcomes, (4) specified  
55  
56 health goals with short- and long-term intentions to engage in the behavior, (5)  
57  
58  
59  
60

1  
2  
3  
4  
5  
6 perceived facilitators and social support, and (6) barriers to instituting change<sup>23 24</sup>.

7  
8 In the present study, we developed the exercise program applying the first 5  
9  
10 concepts.

11  
12  
13 We will also provide the participant a brochure as a reminder to exercise and  
14  
15 will check the type of physical activity they engage in in daily life (Figure 5). When  
16  
17 developing the habit-B program, we collaborated closely with exercise scientists,  
18  
19 oncologists, physical therapists, nurses, mental health practitioners, and breast  
20  
21 cancer survivors.  
22  
23  
24  
25  
26  
27

## 28 29 Control group

30  
31 The control group will be provided a wearable device and setup support  
32  
33 at the start of intervention. Self-monitoring using the wearable device will be  
34  
35 recommended during the trial period. While there are no reports of increasing  
36  
37  $VO_{2peak}$  with the use of a wearable device alone, other reports have ruled out their  
38  
39 efficacy with regard to effects on exercise habits<sup>25</sup>. In this study, the wearable  
40  
41 devices are used only to monitor physical activity in the control group.  
42  
43  
44  
45  
46  
47

## 48 49 **PROCEDURE**

### 50 51 **Data collection, management, monitoring, and auditing**

52  
53 We will collect all data except qualitative interview data, blood samples,  
54  
55 fecal samples, and medical economic costs through the e-PRO system. Those who  
56  
57 provide consent will be enrolled in the app-based e-PRO system on their  
58  
59  
60

1  
2  
3  
4  
5  
6 smartphone. If the entered data is insufficient, enrollment will not be accepted  
7  
8 until all fields are completed at baseline. The electronic data capture system will be  
9  
10 used for data management and central monitoring. Because this exercise program  
11  
12 will not be invasive, there is no need to establish a data monitoring committee or  
13  
14 to complete auditing in this study.  
15  
16  
17  
18  
19  
20

### 21 **Random assignment and assignment adjustment factors**

22  
23 After enrollment and the additional input of the  $VO_{2peak}$  value, patients  
24  
25 will be randomly assigned. In the process of random assignment,  $VO_{2peak}$  (obtained  
26  
27 from the baseline measurement performed after obtaining informed consent) and  
28  
29 age will be used as assignment adjustment factors, and automatic assignment will  
30  
31 be performed using the data center's assignment feature. Only the measurer will  
32  
33 be blinded in this study, because interventions differ for the intervention group  
34  
35 and control group.  
36  
37  
38  
39  
40  
41  
42  
43

### 44 **Dataset availability**

45  
46 The data sharing policy in this study is defined with reference to the  
47  
48 example proposed by the International Committee of Medical Journal Editors  
49  
50 (ICMJE): Individual participant data will be made publicly available for a 5-year  
51  
52 period through the University Hospital Medical Information Network – Individual  
53  
54 Case Data Repository (UMIN-ICDR) (<https://www.umin.ac.jp/icdr/index-j.html>).  
55  
56  
57  
58  
59  
60

### **Concomitant treatments**

There are no regulated concomitant therapies or supportive therapies in this study.

### **Stopping rules for participants**

Situations in which the intervention protocol is terminated for any of the following reasons will be defined as stopping of the protocol intervention: (1) dropping out due to withdrawal of consent or inability to measure the primary endpoint ( $VO_{2peak}$ ); (2) if a primary physician deems it necessary to stop the protocol intervention for a participant due to adverse events such as stress; (3) death of the patient during the protocol intervention period; (4) sudden worsening of the participant's condition after enrollment or discovery of a protocol violation or ineligibility. A researcher will report the reason for stopping the protocol intervention to the data center. In this event, as long as consent is not withdrawn, follow-up including the questionnaire survey will be continued.

### **Stopping of the assessment**

Situations in which the participant declines assessment will effectively stop the assessment. A researcher will confirm the possibility of implementing the remaining parts of the intervention and follow-up with the participant. Stopping of the assessment will be recorded along with the details of the reason for stopping.



1  
2  
3  
4  
5  
6 As a rule, the remaining aspect of follow-up will be implemented as stipulated per  
7  
8 protocol.  
9

## 10 11 12 13 **Assessment measures**

14  
15  
16 Table 1 shows the outcome measurement schedule.  
17

18  
19  
20  
21 **Primary outcome measure: Cardiorespiratory fitness ( $VO_{2peak}$ )**

22  
23  $VO_{2peak}$  is the maximum oxygen uptake observed during exercise  
24 tolerance testing and is used as an indicator of cardiorespiratory fitness<sup>26 27</sup>. For  
25 each participant,  $VO_{2peak}$  will be measured using the incremental multistage load  
26 method with a bicycle ergometer (Ergomedic 828E, Monark, Stockholm, Sweden)  
27 at 60 revolutions per min (rpm). The test will begin at 0.5 kp and increase by 0.25  
28 kp per min until exhaustion. When the participant's pedal rotation speed drops  
29 below 55 rpm 3 times, the test will be deemed concluded. Respiratory gases will be  
30 analyzed using an automatic gas analyzer (Air Monitor AE-310S, Minato Medical  
31 Science Co., Ltd., Osaka, Japan). Rated perceived exertion and HR will be recorded  
32 after 45 s in each stage. The maximum value of  $VO_2$  observed during exercise will  
33 be used as the  $VO_{2peak}$ .  
34  
35  
36  
37  
38  
39  
40  
41  
42  
43  
44  
45  
46  
47  
48  
49  
50  
51  
52  
53

54 **Secondary outcome measures**

55  
56 *Physical function*  
57  
58  
59  
60

1  
2  
3  
4  
5  
6 An alternative indicator of  $VO_{2peak}$  the 6-min walk test (m), will be  
7  
8 performed<sup>28</sup>. Walking speed (m/s), a diagnostic criterion for sarcopenia, will also  
9  
10 be measured. A 5-m section in the middle of an 11-m line will be measured to  
11  
12 calculate walking speed<sup>29</sup>. One-repetition maximum for leg press, which reflects  
13  
14 muscle strength in the lower body, will be assessed using a leg press machine  
15  
16 (Powertec Leg Press P-LP16; Powertec, Paramount, CA)<sup>30 31</sup>. After a thorough  
17  
18 warm-up, measurements will be performed by incrementally increasing the load  
19  
20 until a weight, which can be lifted only once, is reached. Load will be increased by  
21  
22 two levels at a time. Grip strength (TKK 5401 Grip-D; Takei, Niigata, Japan) will  
23  
24 also be measured<sup>31 32</sup>. The chair stand test, which reflects combined leg strength  
25  
26 for the lower limbs as a whole, will be performed<sup>31 33</sup>. Participants will sit and  
27  
28 stand from a chair for 10 s and the number of chair stands will be measured. The  
29  
30 timed up and go test, which is used in clinical settings as an assessment of  
31  
32 functionality as well as muscular strength, will also be performed<sup>31</sup>. The functional  
33  
34 reach test, which as a method of assessing dynamic balance is considered an  
35  
36 indicator of expected fall risk, will also be performed<sup>34</sup>. While keeping the hand at  
37  
38 the same height, the participant will extend their arm forward as far as possible,  
39  
40 without moving the feet, to make a mark at the farthest point they can reach.  
41  
42 Lifting the heels and standing on tiptoe is allowed. The two-step test will also be  
43  
44 performed<sup>35</sup>. This test comprehensively assesses ability to walk, including leg  
45  
46 strength, balance, and flexibility. Based on bioelectrical impedance analysis, a body  
47  
48  
49  
50  
51  
52  
53  
54  
55  
56  
57  
58  
59  
60

1  
2  
3  
4  
5  
6 composition meter (MC-780A-N, TANITA, Japan) will be used to send a weak  
7  
8 electrical current through the body via electrodes.  
9

### 10 11 12 13 *Physical activity level*

14  
15  
16 The Global Physical Activity Questionnaire (GPAQ) was developed in  
17  
18 2002 as an internationally standardized questionnaire for surveying physical  
19  
20 activity level. The GPAQ is widely used in policy development by the World Health  
21  
22 Organization<sup>36-38</sup>. The face validity of the Japanese version has been confirmed<sup>39</sup>.  
23  
24 In addition, as an objective measure of physical activity during the research period,  
25  
26 resting HR, steps, distance, calorie expenditure, and the duration of each sleep  
27  
28 stage as well as wake up time will be measured using an activity monitor and  
29  
30 logged for 24-h periods (Fitbit versa, Fitbit Inc., San Francisco, CA). Maximum HR  
31  
32 during exercise will also be measured to confirm whether the intensity of the  
33  
34 exercise being implemented is appropriate. The accurately measured group will be  
35  
36 defined as the group who wears the Fitbit versa at least 60% of the time during the  
37  
38 12-week intervention period.  
39  
40  
41  
42  
43  
44  
45  
46  
47  
48

### 49 *Subjective measures*

50  
51 Fear of cancer recurrence (FCR) will be assessed by the overall fear index  
52  
53 score on the Concerns About Recurrence Scale<sup>40 41</sup>. This instrument comprises 4  
54  
55 items scored on a 6-point Likert scale (range, 1–6), with a higher score indicating  
56  
57 worse FCR. Depression will be assessed using the Patient Health Questionnaire-9  
58  
59  
60

1  
2  
3  
4  
5  
6 42. Fatigue will be assessed by the Cancer Fatigue Scale. Sleep will be assessed by  
7  
8 the Athens Insomnia Scale<sup>43 44</sup>. Health-related QOL will be assessed using the  
9  
10 EuroQol 5 Dimensions questionnaire<sup>45 46</sup>.  
11  
12  
13  
14  
15

### 16 *Biological assessments*

17  
18 To assess changes in gut microbiota, intestinal metabolites, and intestinal  
19 immunity<sup>47</sup>, a 1-g fecal sample will be obtained at baseline and at 12 weeks. Blood  
20  
21 compositions of n-3 polyunsaturated fatty acids<sup>48</sup> will be assessed from capillary  
22  
23 dried blood spot samples (approximately 80  $\mu$ L) at baseline<sup>49</sup>.  
24  
25  
26  
27  
28  
29  
30

### 31 *Medical economic costs*

32  
33 For cost-benefit analysis, the number of staff, working hours, labor costs,  
34  
35 equipment costs, office expenses, number of unexpected medical consultations,  
36  
37 direct medical costs, and costs of other medical services used will be obtained.  
38  
39  
40  
41  
42  
43

### 44 **Harms**

45  
46 The intervention in this research will potentially place stress on  
47  
48 participants physically and in terms of their time, because it will take  
49  
50 approximately 1 h and 30 min. There will also be temporary exhaustion, although  
51  
52 individual differences will be considered in exercise implementation. There are no  
53  
54 financial risks associated with participation in the study.  
55  
56  
57  
58  
59  
60

## Compensation

If participants develop unexpected health issues due to study participation during or after completion of the study, treatment will be provided appropriately in the same way as standard medical care. Medical expenses at that time will be handled within the medical insurance to which the participant is enrolled. No financial compensation, except for providing the wearable device, will be given in this study.

## DATA ANALYSIS

The primary endpoint,  $VO_{2peak}$ , will be calculated as follows. Measurements will be taken at the start of the intervention (0 week) and at the conclusion of the intervention (12 weeks). The analysis set for primary analyses will consist of all randomized subjects. Our primary analysis is intention-to-treat analysis and patients without outcome data will be excluded from the analyses. After completing primary endpoint data locking, analyses centering on the primary endpoint will be performed. The objective of primary analysis in this study is to investigate whether the habit-B program group (trial treatment group) surpasses the group receiving treatment as usual (control) in  $VO_{2peak}$ , the primary endpoint. One-sided tests will be used, because, if the trial intervention group is inferior to the control group, it is not important in this trial whether that difference is statistically significant. The trial will adopt a one-sided significance level of 2.5%. A between-groups comparison will be performed using an independent two-sample

1  
2  
3  
4  
5  
6 t-test to determine the significance of amount of change in  $VO_{2peak}$  (mL/kg/min)  
7  
8 from 0 week to 12 weeks (after intervention completion) between the trial  
9  
10 intervention and the control groups. Secondary endpoint analyses will be  
11  
12 performed with the goal of supplementing the primary analyses. The detailed  
13  
14 methods for supplementary analyses will be specified in the Statistical Analysis  
15  
16 Plan before the study data is fixed. Once all data has been locked following  
17  
18 conclusion of the primary analysis period and follow-up, final analyses will be  
19  
20 performed.  
21  
22  
23  
24  
25  
26  
27  
28

### 29 **Sample size estimation**

30  
31 The main hypothesis of this study is that the intervention group will  
32  
33 significantly surpass the control group in terms of the amount of change in  $VO_{2peak}$   
34  
35 from 0 week to 12 weeks. Regarding the clinical significance of the results of an  
36  
37 exercise program, it is common to use an increase of 10% in  $VO_{2peak}$  to evaluate the  
38  
39 effects of an exercise program<sup>50</sup>. As such, an increase of 10% from  $VO_{2peak}$  at the  
40  
41 start of exercise has been established for this trial. According to a previous study of  
42  
43 intervention similar to that in the present study<sup>51</sup>, the standard deviation for the  
44  
45  $VO_{2peak}$  of the intervention group was 2.6 mL/kg/min. Based on the above  
46  
47 hypothesis, by estimating the number of subjects required for a one-sided 2.5%  
48  
49 and a power of 80% in the analysis, 28 individuals per group are necessary for a  
50  
51 total of 56 in both groups (SAS 9.4 software; SAS Institute Inc., Cary, NC). With the  
52  
53 estimation that 4 participants will drop out, enrollment of 60 patients is planned.  
54  
55  
56  
57  
58  
59  
60

## Study period

The study period of this trial will be from April 2019 to March 2021; the participant entry period will be from April 2019 to March 2020. Study enrolment, intervention, and data collection are ongoing.

## PATIENT AND PUBLIC INVOLVEMENT STATEMENT

This study protocol was designed with the involvement of a breast cancer survivor who participated in this study as a researcher and coauthor. She discussed issues with other survivors in instances where survivors' preferences and opinions should be considered. In the process of creating the habit-B program, we conducted a preliminary confirmation of the feasibility and safety of this program in 5 breast cancer survivors.

## ETHICAL CONSIDERATIONS AND DISSEMINATION

The protocol was approved by the Institutional Review Board of the National Cancer Center Research Ethical Review Committee on 28 February 2019 (ID: 2018-274). The results obtained will be submitted for publication in a peer-reviewed international journal, and the main relevant findings will be presented at conferences.

## DISCUSSION

An excellent review by Shapiro et al. affirms the positive role that high levels of physical activity play in improving not only health-related QOL and symptom management (e.g., chronic pain, fatigue, insomnia, sexual dysfunction, metabolic syndrome, bone loss, cognitive dysfunction, and depression), but also return to work in cancer survivors<sup>52</sup>. In addition, increased cardiorespiratory fitness may decrease all-cause mortality among cancer survivors<sup>53,54</sup>. However, there are currently no effective home-based exercise programs available for improving cardiorespiratory fitness for breast cancer survivors. No studies have precisely investigated cardiorespiratory fitness<sup>55</sup>; however, a small pilot study did estimate  $VO_2$  based on subjective exercise intensity among Japanese breast cancer survivors. Accordingly, the present study seeks to confirm whether our originally developed home-based exercise program (habit-B program) improves  $VO_{2peak}$  compared with treatment as usual with wearable device in sedentary breast cancer survivors in Japan. With the assumption that the program will be widely implemented if successful, it was designed to be (1) home based, (2) quick to implement (only 10 min in total), (3) use only body weight exercises involving the lower limbs, and (4) utilize a wearable device for which personalized ICT support is available. We believe that no similar studies have been implemented.

If it is found that the habit-B program is effective in increasing  $VO_{2peak}$ , we will then proceed to the next trial, aiming for its widespread implementation in society. Specifically, the aims of the next study will be (1) to investigate whether



1  
2  
3  
4  
5  
6 intervention using the program developed in this research but presented in a  
7  
8 simpler format is effective in establishing exercise habits and (2) to assess whether  
9  
10 the program can be implemented in societies in Eastern Asia, including in both  
11  
12 urban and rural Japan and other East Asian countries.  
13  
14

15  
16 We strongly believe that a successful support team comprising specialists in  
17  
18 the field of exercise science, medicine, rehabilitation, nursing, and patient  
19  
20 advocacy, as involved in this study, will provide a new horizon in cancer  
21  
22 survivorship care.  
23  
24  
25  
26  
27  
28  
29  
30  
31  
32  
33  
34  
35  
36  
37  
38  
39  
40  
41  
42  
43  
44  
45  
46  
47  
48  
49  
50  
51  
52  
53  
54  
55  
56  
57  
58  
59  
60

## Acknowledgements

We sincerely thank Dr. Hiroji Iwata, Dr. Hirokazu Arai, Ms. Noriko Watanabe, Dr. Noriaki Tatematsu, Dr. Hikaru Ihira, Mr. Tomoyasu Chigahara, Dr. Taro Ueno, Dr. Shinji Fukuda, and Dr. Eiko Saito for their generous support for the study. We also thank Ms. Ayako Sato for her role as an exercise model.

**Contributors** KT, EO, RO, YS, TK, and YM conceived the study and drafted the original protocol. KT, EO, RO, YS, TS, AK, TU, TK, and YM participated in refining the protocol. TU developed app and EDC system and managed datacenter. AK played a major role in the statistical analysis. KT, EO, TK, and NS contributed to developing the exercise program. KT, EO and YM drafted the manuscript. All authors participated in, read, and approved the final manuscript.

**Funding** This study is supported by a National Cancer Center Research and Development Fund (30-A-17).

**Competing interests** EO has received research support from Nippon Suisan Kaisha, Ltd. YJM has received speaker fees from Pfizer, Mochida, Eli Lilly, Morinaga Milk, and NTT Data and is conducting collaborative research with Morinaga Milk. AK has received speaking fees from Chugai Pharmaceutical Co., Ltd. All other authors declare that they have no competing interests regarding this work.

**Ethics approval.** The protocol was approved by the Institutional Review Board of the National Cancer Center on 28 February 2019 (ID: 2018-347).

## FIGURE LEGENDS

Figure 1. Flow diagram of study participants. HIIT, high-intensity interval training; ICT, information and communication technology.

Figure 2. Study design of the habit-b program (**h**ome-based high-intensity interval training **and** **b**ehavioral modification using **i**nformation and communication **t**echnology on cardiorespiratory fitness and exercise habits for sedentary **b**reast cancer survivors). HIIT, high-intensity interval training; ICT, information and communication technology.

Figure 3. Screenshots of the application for the smartphone-based exercise movie.

Figure 4. Sample of high-intensity interval training using body weight exercise.

Figure 5. Brochure reminding participants about the importance of exercise and providing instructions about physical activity in daily life.

## References

1. Denlinger CS, Sanft T, Baker KS, et al. Survivorship, Version 2.2017, NCCN Clinical Practice Guidelines in Oncology. *J Natl Compr Canc Netw* 2017;15(9):1140–63. doi: 10.6004/jnccn.2017.0146 [published Online First: 2017/09/07]
2. Public survey about cancer control in Japan. (*the Cabinet Office*), <https://survey.gov-online.go.jp/h26/h26-gantaisaku/5.html> (accessed on 2018/Aug./10)
3. Denlinger CS, Carlson RW, Are M, et al. Survivorship: Introduction and Definition: Clinical Practice Guidelines in Oncology. *Journal of the National Comprehensive Cancer Network : JNCCN* 2014;12(1):34–45.
4. Rock CL, Doyle C, Demark-Wahnefried W, et al. Nutrition and physical activity guidelines for cancer survivors. *CA: A Cancer Journal for Clinicians* 2012;62(4):242–74. doi: 10.3322/caac.21142
5. Hori M MT, Shibata A, Katanoda K, Sobue T, Nishimoto H, et al. Cancer incidence and incidence rates in Japan in 2009: a study of 32 population-based cancer registries for the Monitoring of Cancer Incidence in Japan (MCIJ) project. *Japanese journal of clinical oncology* 2015;45(9):884–91.
6. Rock CL, Flatt SW, Byers TE, et al. Results of the Exercise and Nutrition to Enhance Recovery and Good Health for You (ENERGY) Trial: A Behavioral Weight Loss Intervention in Overweight or Obese Breast Cancer Survivors. *J Clin Oncol* 2015;33(28):3169–76. doi: 10.1200/JCO.2015.61.1095 [published Online First: 2015/08/19]
7. Kuwabara M, Kuwabara R, Niwa K, et al. Different Risk for Hypertension, Diabetes, Dyslipidemia, and Hyperuricemia According to Level of Body Mass Index in Japanese and American Subjects. *Nutrients* 2018;10(8) doi: 10.3390/nu10081011 [published Online First: 2018/08/08]
8. Rogers LQ, Courneya KS, Anton PM, et al. Effects of the BEAT Cancer physical activity behavior change intervention on physical activity, aerobic fitness, and quality of life in breast cancer survivors: a multicenter randomized controlled

- 1  
2  
3  
4  
5  
6 trial. *Breast Cancer Res Treat* 2015;149(1):109–19. doi: 10.1007/s10549-014-  
7 3216-z [published Online First: 2014/11/25]  
8
- 9 9. Dolan LB, Campbell K, Gelmon K, et al. Interval versus continuous aerobic  
10 exercise training in breast cancer survivors—a pilot RCT. *Support Care*  
11 *Cancer* 2016;24(1):119–27. doi: 10.1007/s00520-015-2749-y [published  
12 Online First: 2015/05/10]  
13
- 14 10. Tanaka H, Desouza CA, Jones PP, et al. Greater rate of decline in maximal  
15 aerobic capacity with age in physically active vs. sedentary healthy women.  
16 *Journal of applied physiology (Bethesda, Md : 1985)* 1997;83(6):1947–53. doi:  
17 10.1152/jappl.1997.83.6.1947 [published Online First: 1998/02/14]  
18
- 19 11. Gulati M, Pandey DK, Arnsdorf MF, et al. Exercise capacity and the risk of death  
20 in women: the St James Women Take Heart Project. *Circulation*  
21 2003;108(13):1554–9. doi: 10.1161/01.Cir.0000091080.57509.E9 [published  
22 Online First: 2003/09/17]  
23
- 24 12. Peel AB, Thomas SM, Dittus K, et al. Cardiorespiratory fitness in breast cancer  
25 patients: a call for normative values. *Journal of the American Heart*  
26 *Association* 2014;3(1):e000432. doi: 10.1161/jaha.113.000432 [published  
27 Online First: 2014/01/15]  
28
- 29 13. Tabata I, Nishimura K, Kouzaki M, et al. Effects of moderate-intensity endurance  
30 and high-intensity intermittent training on anaerobic capacity and VO2max.  
31 *Med Sci Sports Exerc* 1996;28(10):1327–30. [published Online First:  
32 1996/10/01]  
33
- 34 14. Batacan RB, Jr., Duncan MJ, Dalbo VJ, et al. Effects of high-intensity interval  
35 training on cardiometabolic health: a systematic review and meta-analysis of  
36 intervention studies. *British journal of sports medicine* 2017;51(6):494–503.  
37 doi: 10.1136/bjsports-2015-095841 [published Online First: 2016/11/01]  
38
- 39 15. Mallol M, Bentley DJ, Norton L, et al. Comparison of Reduced-Volume High-  
40 Intensity Interval Training and High-Volume Training on Endurance  
41 Performance in Triathletes. *International journal of sports physiology and*  
42 *performance* 2019;14(2):239–45. doi: 10.1123/ijsp.2018-0359 [published  
43 Online First: 2018/08/07]  
44  
45  
46  
47  
48  
49  
50  
51  
52  
53  
54  
55  
56  
57  
58  
59  
60

16. Mugele H, Freitag N, Wilhelmi J, et al. High-intensity interval training in the therapy and aftercare of cancer patients: a systematic review with meta-analysis. *J Cancer Surviv* 2019 doi: 10.1007/s11764-019-00743-3 [published Online First: 2019/02/27]
17. McRae G, Payne A, Zelt JG, et al. Extremely low volume, whole-body aerobic-resistance training improves aerobic fitness and muscular endurance in females. *Applied physiology, nutrition, and metabolism = Physiologie appliquee, nutrition et metabolisme* 2012;37(6):1124-31. doi: 10.1139/h2012-093 [published Online First: 2012/09/22]
18. Gresham G, Hendifar AE, Spiegel B, et al. Wearable activity monitors to assess performance status and predict clinical outcomes in advanced cancer patients. *npj Digital Medicine* 2018;1(1):27. doi: 10.1038/s41746-018-0032-6
19. Piercy KL, Troiano RP, Ballard RM, et al. The Physical Activity Guidelines for Americans Physical Activity Guidelines for Americans Physical Activity Guidelines for Americans. *JAMA* 2018;320(19):2020-28. doi: 10.1001/jama.2018.14854
20. Akechi T, Yamaguchi T, Uchida M, et al. Smartphone problem-solving and behavioural activation therapy to reduce fear of recurrence among patients with breast cancer (SMartphone Intervention to LEssen fear of cancer recurrence: SMILE project): protocol for a randomised controlled trial. *BMJ Open* 2018;8(11):e024794. doi: 10.1136/bmjopen-2018-024794 [published Online First: 2018/11/11]
21. Gresham G, Schrack J, Gresham LM, et al. Wearable activity monitors in oncology trials: Current use of an emerging technology. *Contemp Clin Trials* 2018;64:13-21. doi: 10.1016/j.cct.2017.11.002 [published Online First: 2017/11/14]
22. Ministry of Health, Labour and Welfare Summary of results of the national nutrition survey, Japan. 2017.;<https://www.mhlw.go.jp/toukei/itiran/gaiyo/k-eisei.html> (accessed on 2018/Aug./10 (in Japanese))
23. Bandura A. Health promotion by social cognitive means. *Health education & behavior : the official publication of the Society for Public Health Education*

- 2004;31(2):143–64. doi: 10.1177/1090198104263660 [published Online First: 2004/04/20]
24. Stacey FG, James EL, Chapman K, et al. A systematic review and meta-analysis of social cognitive theory-based physical activity and/or nutrition behavior change interventions for cancer survivors. *J Cancer Surviv* 2015;9(2):305–38. doi: 10.1007/s11764-014-0413-z [published Online First: 2014/11/30]
25. Abedtash H, Holden RJ. Systematic review of the effectiveness of health-related behavioral interventions using portable activity sensing devices (PASDs). *Journal of the American Medical Informatics Association : JAMIA* 2017;24(5):1002–13. doi: 10.1093/jamia/ocx006 [published Online First: 2017/03/25]
26. Taylor HL, Buskirk E, Henschel A. Maximal oxygen intake as an objective measure of cardio-respiratory performance. *Journal of applied physiology* 1955;8(1):73–80. doi: 10.1152/jappl.1955.8.1.73 [published Online First: 1955/07/01]
27. Whipp BJ, Davis JA, Torres F, et al. A test to determine parameters of aerobic function during exercise. *Journal of applied physiology: respiratory, environmental and exercise physiology* 1981;50(1):217–21. doi: 10.1152/jappl.1981.50.1.217 [published Online First: 1981/01/01]
28. Ross RM, Murthy JN, Wollak ID, et al. The six minute walk test accurately estimates mean peak oxygen uptake. *BMC pulmonary medicine* 2010;10:31. doi: 10.1186/1471-2466-10-31 [published Online First: 2010/05/28]
29. Chen LK, Liu LK, Woo J, et al. Sarcopenia in Asia: consensus report of the Asian Working Group for Sarcopenia. *J Am Med Dir Assoc* 2014;15(2):95–101. doi: 10.1016/j.jamda.2013.11.025 [published Online First: 2014/01/28]
30. Schmitz KH, Ahmed RL, Troxel A, et al. Weight lifting in women with breast-cancer-related lymphedema. *The New England journal of medicine* 2009;361(7):664–73. doi: 10.1056/NEJMoa0810118 [published Online First: 2009/08/14]
31. Neil-Sztramko SE, Kirkham AA, Hung SH, et al. Aerobic capacity and upper limb strength are reduced in women diagnosed with breast cancer: a systematic

- 1  
2  
3  
4  
5  
6 review. *Journal of physiotherapy* 2014;60(4):189–200. doi:  
7 10.1016/j.jphys.2014.09.005 [published Online First: 2014/12/03]  
8
- 9 32. Van der Weijden–Van Doornik EM, Slot DE, Burtin C, et al. Grip Strength in  
10 Women Being Treated for Breast Cancer and Receiving Adjuvant Endocrine  
11 Therapy: Systematic Review. *Phys Ther* 2017;97(9):904–14. doi:  
12 10.1093/ptj/pzx069 [published Online First: 2017/10/04]  
13
- 14 33. Herrero F, San Juan AF, Fleck SJ, et al. Combined aerobic and resistance  
15 training in breast cancer survivors: A randomized, controlled pilot trial.  
16 *International journal of sports medicine* 2006;27(7):573–80. doi: 10.1055/s-  
17 2005–865848 [published Online First: 2006/06/28]  
18
- 19 34. Foley MP, Hasson SM. Effects of a Community–Based Multimodal Exercise  
20 Program on Health–Related Physical Fitness and Physical Function in Breast  
21 Cancer Survivors:A Pilot Study. *Integrative Cancer Therapies*  
22 2016;15(4):446–54. doi: 10.1177/1534735416639716  
23
- 24 35. Maruya K, Fujita H, Arai T, et al. Identifying elderly people at risk for cognitive  
25 decline by using the 2–step test. *J Phys Ther Sci* 2018;30(1):145–49. doi:  
26 10.1589/jpts.30.145  
27
- 28 36. Organization WH. Global Physical Activity Surveillance [Available from:  
29 <http://www.who.int/ncds/surveillance/steps/GPAQ/en/> accessed Aug. 10  
30 2018.  
31
- 32 37. Cleland CL, Hunter RF, Kee F, et al. Validity of the global physical activity  
33 questionnaire (GPAQ) in assessing levels and change in moderate–vigorous  
34 physical activity and sedentary behaviour. *BMC Public Health* 2014;14:1255.  
35 doi: 10.1186/1471–2458–14–1255 [published Online First: 2014/12/11]  
36
- 37 38. Chu AH, Ng SH, Koh D, et al. Reliability and Validity of the Self– and Interviewer–  
38 Administered Versions of the Global Physical Activity Questionnaire (GPAQ).  
39 *PLoS One* 2015;10(9):e0136944. doi: 10.1371/journal.pone.0136944 [published  
40 Online First: 2015/09/04]  
41
- 42 39. Bull FC, Maslin TS, Armstrong T. Global physical activity questionnaire (GPAQ):  
43 nine country reliability and validity study. *Journal of physical activity & health*  
44 2009;6(6):790–804. [published Online First: 2010/01/28]  
45  
46  
47  
48  
49  
50  
51  
52  
53  
54  
55  
56  
57  
58  
59  
60



- 1  
2  
3  
4  
5  
6 40. Vickberg SM. The Concerns About Recurrence Scale (CARS): a systematic  
7 measure of women's fears about the possibility of breast cancer recurrence.  
8 *Ann Behav Med* 2003;25(1):16–24.  
9
- 10 41. Momino K, Akechi T, Yamashita T, et al. Psychometric Properties of the  
11 Japanese Version of the Concerns About Recurrence Scale (CARS–J).  
12 *Japanese Journal of Clinical Oncology* 2014;44(5):456–62. doi:  
13 10.1093/jjco/hyu032  
14
- 15 42. Muramatsu K, Miyaoka H, Kamijima K, et al. The patient health questionnaire,  
16 Japanese version: validity according to the mini–international  
17 neuropsychiatric interview–plus. *Psychological reports* 2007;101(3 Pt 1):952–  
18 60. doi: 10.2466/pr0.101.3.952–960 [published Online First: 2008/02/01]  
19
- 20 43. Okajima I, Nakajima S, Kobayashi M, et al. Development and validation of the  
21 Japanese version of the Athens Insomnia Scale. *Psychiatry and clinical  
22 neurosciences* 2013;67(6):420–25. doi: 10.1111/pcn.12073 [published Online  
23 First: 2013/08/05]  
24
- 25 44. Soldatos CR, Dikeos DG, Paparrigopoulos TJ. Athens Insomnia Scale: validation  
26 of an instrument based on ICD–10 criteria. *Journal of psychosomatic  
27 research* 2000;48(6):555–60.  
28
- 29 45. Rabin R, de Charro F. EQ–5D: a measure of health status from the EuroQol  
30 Group. *Annals of medicine* 2001;33(5):337–43. [published Online First:  
31 2001/08/09]  
32
- 33 46. Tsuchiya A, Ikeda S, Ikegami N, et al. Estimating an EQ–5D population value set:  
34 the case of Japan. *Health economics* 2002;11(4):341–53. doi: 10.1002/hec.673  
35 [published Online First: 2002/05/15]  
36
- 37 47. Monda V, Villano I, Messina A, et al. Exercise Modifies the Gut Microbiota with  
38 Positive Health Effects. *Oxidative medicine and cellular longevity*  
39 2017;2017:3831972. doi: 10.1155/2017/3831972 [published Online First:  
40 2017/03/31]  
41
- 42 48. Zebrowska A, Mizia–Stec K, Mizia M, et al. Omega–3 fatty acids supplementation  
43 improves endothelial function and maximal oxygen uptake in endurance–  
44 trained athletes. *European journal of sport science* 2015;15(4):305–14. doi:  
45 10.1080/17461391.2014.949310 [published Online First: 2014/09/02]  
46  
47  
48  
49  
50  
51  
52  
53  
54  
55  
56  
57  
58  
59  
60

- 1  
2  
3  
4  
5  
6 49. Liu G, Muhlhausler BS, Gibson RA. A method for long term stabilisation of long  
7 chain polyunsaturated fatty acids in dried blood spots and its clinical  
8 application. *Prostaglandins, leukotrienes, and essential fatty acids*  
9 2014;91(6):251–60. doi: 10.1016/j.plefa.2014.09.009 [published Online First:  
10 2014/12/03]  
11  
12  
13  
14 50. Scribbans TD, Vecsey S, Hankinson PB, et al. The Effect of Training Intensity on  
15 VO2max in Young Healthy Adults: A Meta-Regression and Meta-Analysis.  
16 *International journal of exercise science* 2016;9(2):230–47. [published Online  
17 First: 2016/05/18]  
18  
19  
20  
21 51. Courneya KS, Mackey JR, Bell GJ, et al. Randomized controlled trial of exercise  
22 training in postmenopausal breast cancer survivors: cardiopulmonary and  
23 quality of life outcomes. *J Clin Oncol* 2003;21(9):1660–8. doi:  
24 10.1200/jco.2003.04.093 [published Online First: 2003/05/02]  
25  
26  
27 52. Shapiro CL, Recht A. Side effects of adjuvant treatment of breast cancer. *The*  
28 *New England journal of medicine* 2001;344(26):1997–2008. doi:  
29 10.1056/nejm200106283442607 [published Online First: 2001/06/30]  
30  
31  
32 53. Peel JB, Sui X, Adams SA, et al. A prospective study of cardiorespiratory fitness  
33 and breast cancer mortality. *Med Sci Sports Exerc* 2009;41(4):742–8. doi:  
34 10.1249/MSS.0b013e31818edac7 [published Online First: 2009/03/12]  
35  
36  
37 54. Jones LW, Courneya KS, Mackey JR, et al. Cardiopulmonary function and age-  
38 related decline across the breast cancer survivorship continuum. *J Clin*  
39 *Oncol* 2012;30(20):2530–7. doi: 10.1200/JCO.2011.39.9014 [published Online  
40 First: 2012/05/23]  
41  
42  
43  
44 55. Okumatsu K, Tsujimoto T, Wakaba K, et al. Physical fitness level in Japanese  
45 breast cancer survivors. *Japanese Journal of Physical Fitness and Sports*  
46 *Medicine* 2018;67(2):169–76. doi: 10.7600/jspfsm.67.169  
47  
48  
49  
50  
51  
52  
53  
54  
55  
56  
57  
58  
59  
60



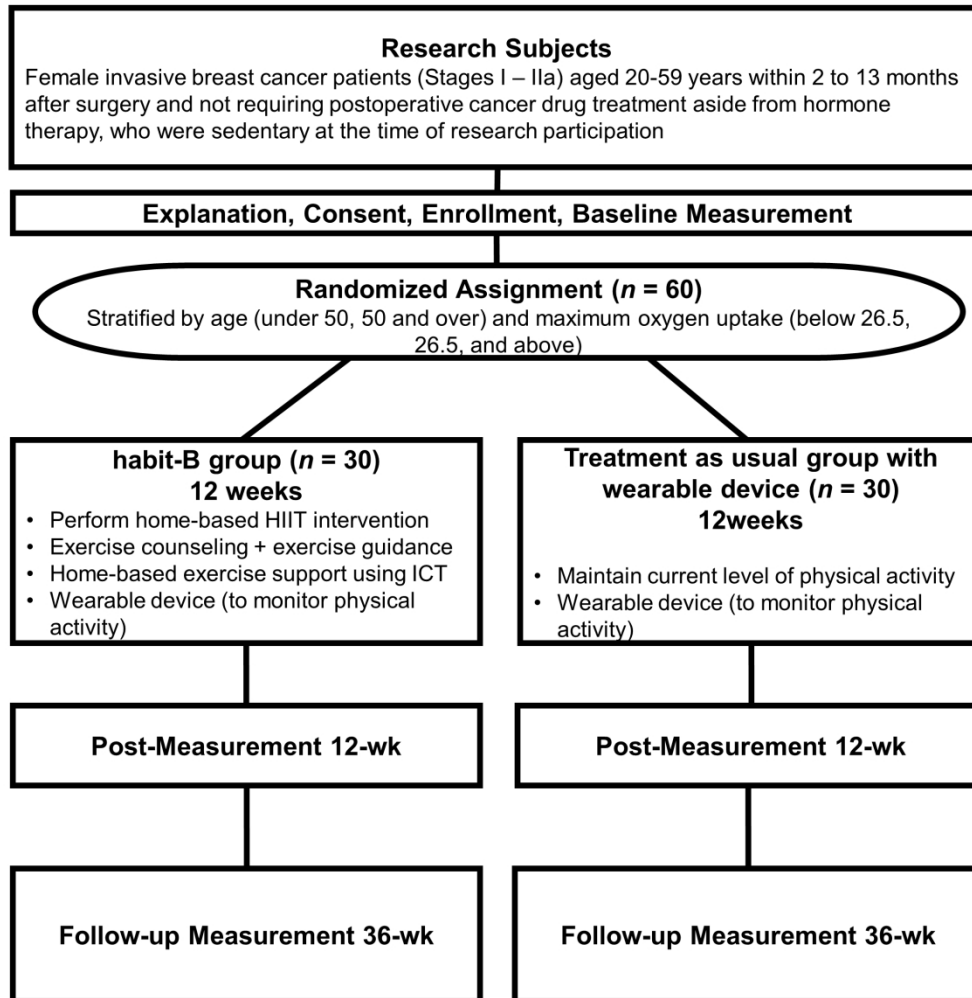

189x195mm (300 x 300 DPI)

1  
2  
3  
4  
5  
6  
7  
8  
9  
10  
11  
12  
13  
14  
15  
16  
17  
18  
19  
20  
21  
22  
23  
24  
25  
26  
27  
28  
29  
30  
31  
32  
33  
34  
35  
36  
37  
38  
39  
40  
41  
42  
43  
44  
45  
46  
47  
48  
49  
50  
51  
52  
53  
54  
55  
56  
57  
58  
59  
60



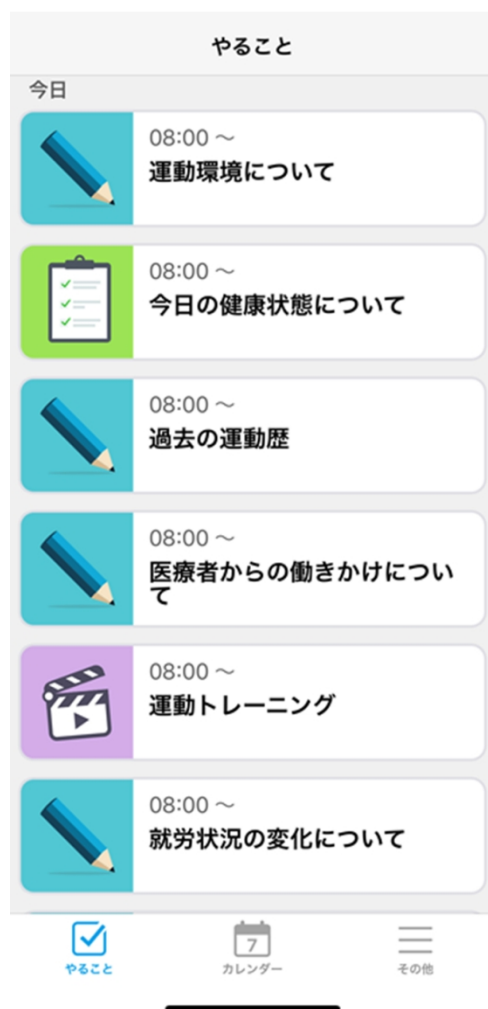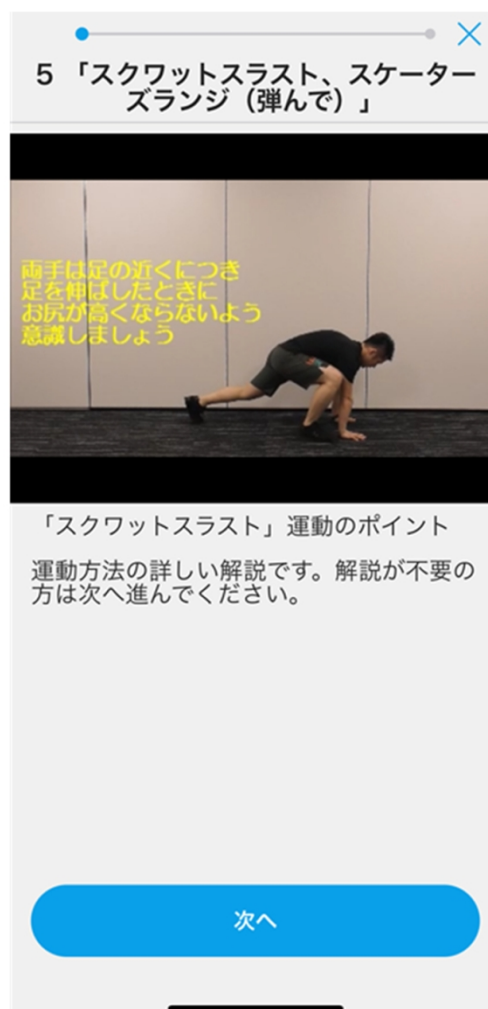

1  
2  
3  
4  
5  
6  
7  
8  
9  
10  
11  
12  
13  
14  
15  
16  
17  
18  
19  
20  
21  
22  
23  
24  
25  
26  
27  
28  
29  
30  
31  
32  
33  
34  
35  
36  
37  
38  
39  
40  
41  
42  
43  
44  
45  
46  
47  
48  
49  
50  
51  
52  
53  
54  
55  
56  
57  
58  
59  
60



|                          |       |      |       |      |       |      |       |      |       |      |       |      |       |      |       |                 |
|--------------------------|-------|------|-------|------|-------|------|-------|------|-------|------|-------|------|-------|------|-------|-----------------|
| 3 min and 10 sec Warm up | Squat | rest | Lunge | rest | Squat | rest | Lunge | rest | Squat | rest | Lunge | rest | Squat | rest | Lunge | 3 min cool down |
|                          | 20 s  | 10 s | 20 s  |                 |

10 min

1  
2  
3  
4  
5  
6  
7  
8  
9  
10  
11  
12  
13  
14  
15  
16  
17  
18  
19  
20  
21  
22  
23  
24  
25  
26  
27  
28  
29  
30  
31  
32  
33  
34  
35  
36  
37  
38  
39  
40  
41  
42  
43  
44  
45  
46  
47  
48  
49  
50  
51  
52  
53  
54  
55  
56  
57  
58  
59  
60



NCC 法政大学  
habit-B

1人ではなくみんなで頑張りましょう!

---

【TSUKIJI habit-B プロジェクト】  
現在、私たちは乳がんサバイバー向けに有酸素能力を向上させるための運動プログラムを開発しています。

〒104-0045 東京都中央区豊町5-1-1  
https://www.ncc.go.jp/cj/cjpb/ds/online/habit\_support/project/20181228175920.html  
お問い合わせ habit-Bプロジェクト  
国立がん研究センター 健康増進部/法政大学 健康増進部



*Let's training*

乳がんサバイバーのあなたへ

## 体力向上のためのトレーニング

自宅で継続・安心トレーニングのご紹介



こんなことありませんか？

|                                       |                                        |
|---------------------------------------|----------------------------------------|
| <input type="checkbox"/> 体力の低下を感じている  | <input type="checkbox"/> 旧もとの体力に戻したい   |
| <input type="checkbox"/> 疲れやすくなる      | <input type="checkbox"/> 一人でトレーニングは不安だ |
| <input type="checkbox"/> そろそろ運動をはじめたい | <input type="checkbox"/> 毎日を楽しみたい      |

毎日の生活に運動を取り入れましょう!

### 疲れにくいカラダをつくる4つの運動

心臓機能を高く維持することは疲れにくいカラダをつくり、乳がんサバイバーにとってきわめて重要です。下記の運動は、ふとももやおしりの筋肉を意識しながら丁寧に実施することで運動中に心拍数を上昇させて心臓機能を向上させます。さらにこれらの運動は認識やサルコペニアの予防にも役立ちます。

**Step 1**



**Point**  
膝つま先の向きを揃えましょう

**Step 2**



**Point**  
膝つま先の向きを揃えて、両足のつま先を揃えましょう

**Step 3**



**Point**  
膝を深く落としましょう

**Step 4**



**Point**  
しゃがみ込むとき、膝立ての姿勢から立ち上がり、膝を一歩スライドの姿勢を繰り返しましょう。

| 運動強度 ★                                                                           | 運動強度 ★★                                                                             | 運動強度 ★★★                                                                                                            | 運動強度 ★★★★★                                                                                                                                                                                            |
|----------------------------------------------------------------------------------|-------------------------------------------------------------------------------------|---------------------------------------------------------------------------------------------------------------------|-------------------------------------------------------------------------------------------------------------------------------------------------------------------------------------------------------|
| <p><b>スクワット</b></p> <p>足を肩幅からやや広めに広げ、お尻を後ろに突き出しながら、上体を倒し過ぎないように膝の曲げ伸ばしを行います。</p> | <p><b>フロントランジ</b></p> <p>片足づつ足を前に出しましょう。背筋を伸ばして、前に出した足の膝がつま先より前に出ないように膝を曲げましょう。</p> | <p><b>ステイパーズランジ</b></p> <p>左右のジャンプ動作が含まれます。膝へ負担がかかる姿勢を避けるように注意しましょう。背筋の曲も、膝つま先の向きを揃えて、次の動作へスムーズにつなげられるようにしましょう。</p> | <p><b>バーピー</b></p> <p>全身を効率よく動かす運動です。</p> <ol style="list-style-type: none"> <li>①しゃがみこんで手をつく</li> <li>②手をついたまま飛び跳ねて足を後ろに伸ばして、膝が足の姿勢になる</li> <li>③飛び跳ねて膝を曲げて、しゃがみこんだ姿勢にもどる</li> <li>④立ち上がる</li> </ol> |



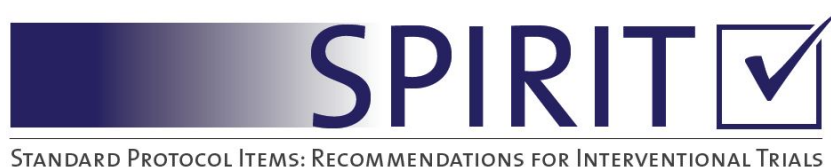

STANDARD PROTOCOL ITEMS: RECOMMENDATIONS FOR INTERVENTIONAL TRIALS

SPIRIT 2013 Checklist: Recommended items to address in a clinical trial protocol and related documents\*

| Section/item                      | Item No | Description                                                                                                                                                                                                                                                                                    |
|-----------------------------------|---------|------------------------------------------------------------------------------------------------------------------------------------------------------------------------------------------------------------------------------------------------------------------------------------------------|
| <b>Administrative information</b> |         |                                                                                                                                                                                                                                                                                                |
| Title                             | 1       | Descriptive title identifying the study design, population, interventions, and, if applicable, trial acronym (p1)                                                                                                                                                                              |
| Trial registration                | 2a      | Trial identifier and registry name. If not yet registered, name of intended registry (p4, 20)                                                                                                                                                                                                  |
|                                   | 2b      | All items from the World Health Organization Trial Registration Data Set (n/a)                                                                                                                                                                                                                 |
| Protocol version                  | 3       | Date and version identifier (p4, 20)                                                                                                                                                                                                                                                           |
| Funding                           | 4       | Sources and types of financial, material, and other support (p23)                                                                                                                                                                                                                              |
| Roles and responsibilities        | 5a      | Names, affiliations, and roles of protocol contributors (p23)                                                                                                                                                                                                                                  |
|                                   | 5b      | Name and contact information for the trial sponsor (p23)                                                                                                                                                                                                                                       |
|                                   | 5c      | Role of study sponsor and funders, if any, in study design; collection, management, analysis, and interpretation of data; writing of the report; and the decision to submit the report for publication, including whether they will have ultimate authority over any of these activities (n/a) |
|                                   | 5d      | Composition, roles, and responsibilities of the coordinating centre, steering committee, endpoint adjudication committee, data management team, and other individuals or groups overseeing the trial, if applicable (see Item 21a for data monitoring committee) (n/a)                         |
| <b>Introduction</b>               |         |                                                                                                                                                                                                                                                                                                |
| Background and rationale          | 6a      | Description of research question and justification for undertaking the trial, including summary of relevant studies (published and unpublished) examining benefits and harms for each intervention (p6)                                                                                        |
|                                   | 6b      | Explanation for choice of comparators (p11)                                                                                                                                                                                                                                                    |
| Objectives                        | 7       | Specific objectives or hypotheses (p6)                                                                                                                                                                                                                                                         |
| Trial design                      | 8       | Description of trial design including type of trial (eg, parallel group, crossover, factorial, single group), allocation ratio, and framework (eg, superiority, equivalence, noninferiority, exploratory) (p8)                                                                                 |

## Methods: Participants, interventions, and outcomes

|                      |     |                                                                                                                                                                                                                                                                                                                                                                                                          |
|----------------------|-----|----------------------------------------------------------------------------------------------------------------------------------------------------------------------------------------------------------------------------------------------------------------------------------------------------------------------------------------------------------------------------------------------------------|
| Study setting        | 9   | Description of study settings (eg, community clinic, academic hospital) and list of countries where data will be collected. Reference to where list of study sites can be obtained( <a href="#">p5</a> )                                                                                                                                                                                                 |
| Eligibility criteria | 10  | Inclusion and exclusion criteria for participants. If applicable, eligibility criteria for study centres and individuals who will perform the interventions (eg, surgeons, psychotherapists) ( <a href="#">p8,9</a> )                                                                                                                                                                                    |
| Interventions        | 11a | Interventions for each group with sufficient detail to allow replication, including how and when they will be administered( <a href="#">p9-11</a> )                                                                                                                                                                                                                                                      |
|                      | 11b | Criteria for discontinuing or modifying allocated interventions for a given trial participant (eg, drug dose change in response to harms, participant request, or improving/worsening disease) ( <a href="#">p13</a> )                                                                                                                                                                                   |
|                      | 11c | Strategies to improve adherence to intervention protocols, and any procedures for monitoring adherence (eg, drug tablet return, laboratory tests) ( <a href="#">p11</a> )                                                                                                                                                                                                                                |
|                      | 11d | Relevant concomitant care and interventions that are permitted or prohibited during the trial( <a href="#">p12,13</a> )                                                                                                                                                                                                                                                                                  |
| Outcomes             | 12  | Primary, secondary, and other outcomes, including the specific measurement variable (eg, systolic blood pressure), analysis metric (eg, change from baseline, final value, time to event), method of aggregation (eg, median, proportion), and time point for each outcome. Explanation of the clinical relevance of chosen efficacy and harm outcomes is strongly recommended( <a href="#">p14-18</a> ) |
| Participant timeline | 13  | Time schedule of enrolment, interventions (including any run-ins and washouts), assessments, and visits for participants. A schematic diagram is highly recommended (see <a href="#">Figure 1,2, and Table 1</a> )                                                                                                                                                                                       |
| Sample size          | 14  | Estimated number of participants needed to achieve study objectives and how it was determined, including clinical and statistical assumptions supporting any sample size calculations( <a href="#">p19</a> )                                                                                                                                                                                             |
| Recruitment          | 15  | Strategies for achieving adequate participant enrolment to reach target sample size( <a href="#">n/a</a> )                                                                                                                                                                                                                                                                                               |

## Methods: Assignment of interventions (for controlled trials)

### Allocation:

|                     |     |                                                                                                                                                                                                                                                                                                                                                                                   |
|---------------------|-----|-----------------------------------------------------------------------------------------------------------------------------------------------------------------------------------------------------------------------------------------------------------------------------------------------------------------------------------------------------------------------------------|
| Sequence generation | 16a | Method of generating the allocation sequence (eg, computer-generated random numbers), and list of any factors for stratification. To reduce predictability of a random sequence, details of any planned restriction (eg, blocking) should be provided in a separate document that is unavailable to those who enrol participants or assign interventions( <a href="#">p8,12</a> ) |
|---------------------|-----|-----------------------------------------------------------------------------------------------------------------------------------------------------------------------------------------------------------------------------------------------------------------------------------------------------------------------------------------------------------------------------------|

|    |                |     |                                                                            |
|----|----------------|-----|----------------------------------------------------------------------------|
| 1  |                |     |                                                                            |
| 2  | Allocation     | 16b | Mechanism of implementing the allocation sequence (eg, central             |
| 3  | concealment    |     | telephone; sequentially numbered, opaque, sealed envelopes),               |
| 4  | mechanism      |     | describing any steps to conceal the sequence until interventions are       |
| 5  |                |     | assigned( <a href="#">p8,12</a> )                                          |
| 6  |                |     |                                                                            |
| 7  | Implementation | 16c | Who will generate the allocation sequence, who will enrol participants,    |
| 8  |                |     | and who will assign participants to interventions( <a href="#">p8,12</a> ) |
| 9  |                |     |                                                                            |
| 10 | Blinding       | 17a | Who will be blinded after assignment to interventions (eg, trial           |
| 11 | (masking)      |     | participants, care providers, outcome assessors, data analysts), and       |
| 12 |                |     | how( <a href="#">p12</a> )                                                 |
| 13 |                |     |                                                                            |
| 14 |                | 17b | If blinded, circumstances under which unblinding is permissible, and       |
| 15 |                |     | procedure for revealing a participant's allocated intervention during      |
| 16 |                |     | the trial( <a href="#">n/a</a> )                                           |
| 17 |                |     |                                                                            |
| 18 |                |     |                                                                            |
| 19 |                |     |                                                                            |

### Methods: Data collection, management, and analysis

|    |                 |     |                                                                                      |
|----|-----------------|-----|--------------------------------------------------------------------------------------|
| 21 | Data collection | 18a | Plans for assessment and collection of outcome, baseline, and other                  |
| 22 | methods         |     | trial data, including any related processes to promote data quality (eg,             |
| 23 |                 |     | duplicate measurements, training of assessors) and a description of                  |
| 24 |                 |     | study instruments (eg, questionnaires, laboratory tests) along with                  |
| 25 |                 |     | their reliability and validity, if known. Reference to where data                    |
| 26 |                 |     | collection forms can be found, if not in the protocol( <a href="#">p18</a> )         |
| 27 |                 |     |                                                                                      |
| 28 |                 | 18b | Plans to promote participant retention and complete follow-up,                       |
| 29 |                 |     | including list of any outcome data to be collected for participants who              |
| 30 |                 |     | discontinue or deviate from intervention protocols( <a href="#">p10,13</a> )         |
| 31 |                 |     |                                                                                      |
| 32 | Data            | 19  | Plans for data entry, coding, security, and storage, including any                   |
| 33 | management      |     | related processes to promote data quality (eg, double data entry;                    |
| 34 |                 |     | range checks for data values). Reference to where details of data                    |
| 35 |                 |     | management procedures can be found, if not in the protocol( <a href="#">p11,12</a> ) |
| 36 |                 |     |                                                                                      |
| 37 |                 |     |                                                                                      |
| 38 |                 |     |                                                                                      |
| 39 |                 |     |                                                                                      |
| 40 | Statistical     | 20a | Statistical methods for analysing primary and secondary outcomes.                    |
| 41 | methods         |     | Reference to where other details of the statistical analysis plan can be             |
| 42 |                 |     | found, if not in the protocol( <a href="#">p18,19</a> )                              |
| 43 |                 |     |                                                                                      |
| 44 |                 | 20b | Methods for any additional analyses (eg, subgroup and adjusted                       |
| 45 |                 |     | analyses) ( <a href="#">p18,19</a> )                                                 |
| 46 |                 |     |                                                                                      |
| 47 |                 | 20c | Definition of analysis population relating to protocol non-adherence                 |
| 48 |                 |     | (eg, as randomised analysis), and any statistical methods to handle                  |
| 49 |                 |     | missing data (eg, multiple imputation) ( <a href="#">p18,19</a> )                    |
| 50 |                 |     |                                                                                      |
| 51 |                 |     |                                                                                      |

### Methods: Monitoring

|    |                 |     |                                                                                    |
|----|-----------------|-----|------------------------------------------------------------------------------------|
| 52 |                 |     |                                                                                    |
| 53 |                 |     |                                                                                    |
| 54 | Data monitoring | 21a | Composition of data monitoring committee (DMC); summary of its role                |
| 55 |                 |     | and reporting structure; statement of whether it is independent from               |
| 56 |                 |     | the sponsor and competing interests; and reference to where further                |
| 57 |                 |     | details about its charter can be found, if not in the protocol.                    |
| 58 |                 |     | Alternatively, an explanation of why a DMC is not needed( <a href="#">p11,12</a> ) |
| 59 |                 |     |                                                                                    |
| 60 |                 |     |                                                                                    |

|    |          |     |                                                                                                                                                                                        |
|----|----------|-----|----------------------------------------------------------------------------------------------------------------------------------------------------------------------------------------|
| 1  |          | 21b | Description of any interim analyses and stopping guidelines, including who will have access to these interim results and make the final decision to terminate the trial(n/a)           |
| 2  |          |     |                                                                                                                                                                                        |
| 3  |          |     |                                                                                                                                                                                        |
| 4  |          |     |                                                                                                                                                                                        |
| 5  |          |     |                                                                                                                                                                                        |
| 6  | Harms    | 22  | Plans for collecting, assessing, reporting, and managing solicited and spontaneously reported adverse events and other unintended effects of trial interventions or trial conduct(p17) |
| 7  |          |     |                                                                                                                                                                                        |
| 8  |          |     |                                                                                                                                                                                        |
| 9  |          |     |                                                                                                                                                                                        |
| 10 | Auditing | 23  | Frequency and procedures for auditing trial conduct, if any, and whether the process will be independent from investigators and the sponsor(p11,12)                                    |
| 11 |          |     |                                                                                                                                                                                        |
| 12 |          |     |                                                                                                                                                                                        |
| 13 |          |     |                                                                                                                                                                                        |
| 14 |          |     |                                                                                                                                                                                        |

### Ethics and dissemination

|    |                               |     |                                                                                                                                                                                                                                                                                            |
|----|-------------------------------|-----|--------------------------------------------------------------------------------------------------------------------------------------------------------------------------------------------------------------------------------------------------------------------------------------------|
| 15 |                               |     |                                                                                                                                                                                                                                                                                            |
| 16 |                               |     |                                                                                                                                                                                                                                                                                            |
| 17 | Research ethics approval      | 24  | Plans for seeking research ethics committee/institutional review board (REC/IRB) approval(p4)                                                                                                                                                                                              |
| 18 |                               |     |                                                                                                                                                                                                                                                                                            |
| 19 |                               |     |                                                                                                                                                                                                                                                                                            |
| 20 |                               |     |                                                                                                                                                                                                                                                                                            |
| 21 | Protocol amendments           | 25  | Plans for communicating important protocol modifications (eg, changes to eligibility criteria, outcomes, analyses) to relevant parties (eg, investigators, REC/IRBs, trial participants, trial registries, journals, regulators) (n/a)                                                     |
| 22 |                               |     |                                                                                                                                                                                                                                                                                            |
| 23 |                               |     |                                                                                                                                                                                                                                                                                            |
| 24 |                               |     |                                                                                                                                                                                                                                                                                            |
| 25 |                               |     |                                                                                                                                                                                                                                                                                            |
| 26 | Consent or assent             | 26a | Who will obtain informed consent or assent from potential trial participants or authorised surrogates, and how (see Item 32) (n/a)                                                                                                                                                         |
| 27 |                               |     |                                                                                                                                                                                                                                                                                            |
| 28 |                               |     |                                                                                                                                                                                                                                                                                            |
| 29 |                               | 26b | Additional consent provisions for collection and use of participant data and biological specimens in ancillary studies, if applicable(n/a)                                                                                                                                                 |
| 30 |                               |     |                                                                                                                                                                                                                                                                                            |
| 31 |                               |     |                                                                                                                                                                                                                                                                                            |
| 32 | Confidentiality               | 27  | How personal information about potential and enrolled participants will be collected, shared, and maintained in order to protect confidentiality before, during, and after the trial(p12)                                                                                                  |
| 33 |                               |     |                                                                                                                                                                                                                                                                                            |
| 34 |                               |     |                                                                                                                                                                                                                                                                                            |
| 35 |                               |     |                                                                                                                                                                                                                                                                                            |
| 36 |                               |     |                                                                                                                                                                                                                                                                                            |
| 37 | Declaration of interests      | 28  | Financial and other competing interests for principal investigators for the overall trial and each study site(p23)                                                                                                                                                                         |
| 38 |                               |     |                                                                                                                                                                                                                                                                                            |
| 39 |                               |     |                                                                                                                                                                                                                                                                                            |
| 40 | Access to data                | 29  | Statement of who will have access to the final trial dataset, and disclosure of contractual agreements that limit such access for investigators(n/a)                                                                                                                                       |
| 41 |                               |     |                                                                                                                                                                                                                                                                                            |
| 42 |                               |     |                                                                                                                                                                                                                                                                                            |
| 43 |                               |     |                                                                                                                                                                                                                                                                                            |
| 44 |                               |     |                                                                                                                                                                                                                                                                                            |
| 45 | Ancillary and post-trial care | 30  | Provisions, if any, for ancillary and post-trial care, and for compensation to those who suffer harm from trial participation(p17,18)                                                                                                                                                      |
| 46 |                               |     |                                                                                                                                                                                                                                                                                            |
| 47 |                               |     |                                                                                                                                                                                                                                                                                            |
| 48 | Dissemination policy          | 31a | Plans for investigators and sponsor to communicate trial results to participants, healthcare professionals, the public, and other relevant groups (eg, via publication, reporting in results databases, or other data sharing arrangements), including any publication restrictions(p4,20) |
| 49 |                               |     |                                                                                                                                                                                                                                                                                            |
| 50 |                               |     |                                                                                                                                                                                                                                                                                            |
| 51 |                               |     |                                                                                                                                                                                                                                                                                            |
| 52 |                               |     |                                                                                                                                                                                                                                                                                            |
| 53 |                               |     |                                                                                                                                                                                                                                                                                            |
| 54 |                               |     |                                                                                                                                                                                                                                                                                            |
| 55 |                               | 31b | Authorship eligibility guidelines and any intended use of professional writers(p11)                                                                                                                                                                                                        |
| 56 |                               |     |                                                                                                                                                                                                                                                                                            |
| 57 |                               |     |                                                                                                                                                                                                                                                                                            |
| 58 |                               | 31c | Plans, if any, for granting public access to the full protocol, participant-level dataset, and statistical code(n/a)                                                                                                                                                                       |
| 59 |                               |     |                                                                                                                                                                                                                                                                                            |
| 60 |                               |     |                                                                                                                                                                                                                                                                                            |

**Appendices**

|                            |    |                                                                                                                                                                                                     |
|----------------------------|----|-----------------------------------------------------------------------------------------------------------------------------------------------------------------------------------------------------|
| Informed consent materials | 32 | Model consent form and other related documentation given to participants and authorised surrogates(n/a)                                                                                             |
| Biological specimens       | 33 | Plans for collection, laboratory evaluation, and storage of biological specimens for genetic or molecular analysis in the current trial and for future use in ancillary studies, if applicable(p17) |

---

\*It is strongly recommended that this checklist be read in conjunction with the SPIRIT 2013 Explanation & Elaboration for important clarification on the items. Amendments to the protocol should be tracked and dated. The SPIRIT checklist is copyrighted by the SPIRIT Group under the Creative Commons "[Attribution-NonCommercial-NoDerivs 3.0 Unported](#)" license.

For peer review only
